# Supplementary material for: Latent profile analysis of nurses’ perceived professional benefits in China: a cross-sectional study
Source: PubMed Central journal article supplement — BMJ Open. 2023 Nov 2;13(11):e078051. doi: 10.1136/bmjopen-2023-078051 (PMC10626806; doi:10.1136/bmjopen-2023-078051), 2023-11-02
Supplement: bmjopen-2023-078051.draft_revisions.pdf [file bmjopen-2023-078051.draft_revisions.pdf]

# BMJ Open

BMJ Open is committed to open peer review. As part of this commitment we make the peer review history of every article we publish publicly available.

When an article is published we post the peer reviewers' comments and the authors' responses online. We also post the versions of the paper that were used during peer review. These are the versions that the peer review comments apply to.

The versions of the paper that follow are the versions that were submitted during the peer review process. They are not the versions of record or the final published versions. They should not be cited or distributed as the published version of this manuscript.

BMJ Open is an open access journal and the full, final, typeset and author-corrected version of record of the manuscript is available on our site with no access controls, subscription charges or pay-per-view fees (<http://bmjopen.bmj.com>).

If you have any questions on BMJ Open's open peer review process please email [info.bmjopen@bmj.com](mailto:info.bmjopen@bmj.com)

# BMJ Open

## Latent profile analysis of nurses' perceived professional benefits: a cross-sectional study

|                               |                                                                                                                                                                                                                                                                                                                                                                                                         |
|-------------------------------|---------------------------------------------------------------------------------------------------------------------------------------------------------------------------------------------------------------------------------------------------------------------------------------------------------------------------------------------------------------------------------------------------------|
| Journal:                      | <i>BMJ Open</i>                                                                                                                                                                                                                                                                                                                                                                                         |
| Manuscript ID                 | bmjopen-2023-078051                                                                                                                                                                                                                                                                                                                                                                                     |
| Article Type:                 | Original research                                                                                                                                                                                                                                                                                                                                                                                       |
| Date Submitted by the Author: | 22-Jul-2023                                                                                                                                                                                                                                                                                                                                                                                             |
| Complete List of Authors:     | Sun, Changli; Third Affiliated Hospital of Zunyi Medical University<br>Jiang, Hu; Affiliated Hospital of Zunyi Medical University<br>Yao, Qingfang; The Third Affiliated Hospital of Zunyi Medical University<br>Wang, Xianwei; The Third Affiliated Hospital of Zunyi Medical University<br>Wen, Xueke; Third Affiliated Hospital of Zunyi Medical University<br>Liu, Hanmei; Zunyi Medical University |
| Keywords:                     | Burnout, Professional, Burnout, China                                                                                                                                                                                                                                                                                                                                                                   |
|                               |                                                                                                                                                                                                                                                                                                                                                                                                         |

SCHOLARONE™  
Manuscripts

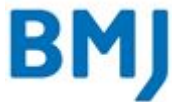

I, the Submitting Author has the right to grant and does grant on behalf of all authors of the Work (as defined in the below author licence), an exclusive licence and/or a non-exclusive licence for contributions from authors who are: i) UK Crown employees; ii) where BMJ has agreed a CC-BY licence shall apply, and/or iii) in accordance with the terms applicable for US Federal Government officers or employees acting as part of their official duties; on a worldwide, perpetual, irrevocable, royalty-free basis to BMJ Publishing Group Ltd ("BMJ") its licensees and where the relevant Journal is co-owned by BMJ to the co-owners of the Journal, to publish the Work in this journal and any other BMJ products and to exploit all rights, as set out in our [licence](#).

The Submitting Author accepts and understands that any supply made under these terms is made by BMJ to the Submitting Author unless you are acting as an employee on behalf of your employer or a postgraduate student of an affiliated institution which is paying any applicable article publishing charge ("APC") for Open Access articles. Where the Submitting Author wishes to make the Work available on an Open Access basis (and intends to pay the relevant APC), the terms of reuse of such Open Access shall be governed by a Creative Commons licence – details of these licences and which [Creative Commons](#) licence will apply to this Work are set out in our licence referred to above.

Other than as permitted in any relevant BMJ Author's Self Archiving Policies, I confirm this Work has not been accepted for publication elsewhere, is not being considered for publication elsewhere and does not duplicate material already published. I confirm all authors consent to publication of this Work and authorise the granting of this licence.

1  
2  
3  
4 **1 Latent profile analysis of nurses' perceived professional benefits: a**  
5  
6 **2 cross-sectional study**  
7

8  
9 **3 Running Head: LPA of nurses' perceived professional benefits**  
10

11  
12  
13  
14 5 Changli Sun<sup>1</sup>, Hu Jiang<sup>1\*</sup>, Qingfang Yao<sup>2</sup>, Xianwei Wang<sup>2</sup>, Xueke Wen<sup>1</sup> and Hanmei  
15  
16 6 Liu<sup>2</sup>,

17  
18 <sup>1</sup> The Third Affiliated Hospital of Zunyi Medical University (The First People's Hospital of  
19  
20 8 Zunyi), Zunyi, Guizhou, China

21  
22 9 <sup>2</sup> Zunyi Medical University, Zunyi, Guizhou, China

23  
24 10 \*Correspondence: [jianghuchn@163.com](mailto:jianghuchn@163.com), Nursing Department, The Third Affiliated  
25  
26 11 Hospital of Zunyi Medical University (The First People's Hospital of Zunyi), Zunyi,  
27  
28 12 Guizhou, China

29  
30  
31  
32  
33  
34  
35  
36  
37  
38  
39  
40  
41  
42  
43  
44  
45  
46  
47  
48  
49  
50  
51  
52  
53  
54  
55  
56  
57  
58  
59  
60

1  
2  
3  
4 14 **Latent profile analysis of nurses' perceived professional benefits: a**  
5  
6  
7 15 **cross-sectional study**

8  
9 16 **ABSTRACT**

10 17 **Aim:** To identify profiles of nurses' perceived professional benefits as well as their  
11  
12  
13 18 predictors.

14  
15 19 **Design:** Cross-sectional descriptive study.

16  
17 20 **Methods:** From July 6 and July 27, 2022, a total of 1,309 registered nurses participated  
18  
19 21 in the survey by convenient sampling. We collected the Nurses' Perceived Professional  
20  
21 22 Benefits Questionnaire (NPPBQ) and demographic data. Using latent profile analysis  
22  
23 23 (LPA), subgroups of nurses' perceived professional benefits were identified. Moreover,  
24  
25 24 univariate and multinomial logistic regression analysis were conducted to find the  
26  
27 25 factors that were linked with the profiles.

28  
29 26 **Results:** The survey was validly completed by 1309 nurses. The findings of the LPA  
30  
31 27 demonstrated three unique profiles: low perceived professional benefits (11.8%),  
32  
33 28 moderate perceived professional benefits (57.1%), and high perceived professional  
34  
35 29 benefits (31.1%). There was a correlation between marital status, the number of night  
36  
37 30 shifts performed each month, and job title.

38 31 **No Patient or Public Contribution.**

39  
40 32  
41  
42 33 **Keywords:** nurse, perceived professional benefits, latent profile analysis, cross-  
43  
44 34 sectional study

45 35  
46  
47  
48  
49  
50  
51  
52  
53  
54  
55  
56  
57  
58  
59  
60

## 1 INTRODUCTION

It is estimated that 69% of the global health workforce consists of nurses<sup>1</sup>. Yet, the present physical and mental health of nurses is not encouraging, as they confront high levels of stress, burnout, turnover, and their own ageing<sup>2-4</sup>. Nursing is no longer a desirable and appealing profession<sup>5</sup>, which makes nurse shortages a widespread worldwide concern<sup>6</sup>. These issues have a direct bearing on the sustainability and continued growth of the nursing workforce. In recent years, nursing in China has experienced remarkable growth, and the most recent statistics indicate that China has more than 5 million registered nurses<sup>7</sup>. Chinese nurses are extremely susceptible to burnout, and a high desire to leave is a serious concern<sup>8,9</sup>. However, there is a dearth of comprehensive study and viable remedies.

The mental health of nurses is receiving increasing attention from managers and researchers in the context of positive psychology. It is beginning to be recognized that nurses' own positive psychology promotes job satisfaction and professional identity, lessens burnout, and hence reduces turnover rates<sup>10,11</sup>. Moreover, despite the fact that nursing is a high-risk, high-stress profession, nurses are able to achieve benefit findings<sup>12-14</sup>. In recent years, the concept of nurses' perceived professional benefits arises naturally, and has gradually attracted the attention of researchers.

### 1.1 Background

Regarding nurses' perceptions of their professional perks, there is no universally agreed definition. Nurses' perceived professional benefits (NPPB) refer to nurses' perceptions of the gains and benefits they receive in their profession during the hiring process, as well as their belief that working in nursing can promote their overall growth and development<sup>15,16</sup>. Essentially, perceived professional benefits can be classified as an emotional experience and cognitive evaluation, which has two aspects: actual benefits and spiritual benefits<sup>15</sup>.

The profession of nursing can be beneficial to nurses in a number of ways. Previous studies<sup>17,18</sup> reported that nursing preceptorship offers many benefits, and nurses may find themselves being more committed to the position as a result. A

1  
2  
3  
4 66 qualitative study <sup>19</sup> found that nurses who were involved in caring for dying patients  
5  
6 67 got a great lot of experience and benefited considerably; they can create a personal  
7  
8 68 philosophy on death and life, in addition to professional growth. Nurses who served  
9  
10 69 as advanced practice nurse roles perceived numerous benefits, including improved  
11  
12 70 patient care quality and safety, professionalism, personal development, career  
13  
14 71 development, intrinsic satisfaction with the role, and impact on other professional  
15  
16 72 groups <sup>20</sup>. A person's perception of professional benefit is an endogenous motivation  
17  
18 73 for his or her development and has a positive effect on that person's career. According  
19  
20 74 to prior study, improving the perceived professional benefit of nurses reduces burnout  
21  
22 75 reduction and enables nurses to approach their work with a good attitude and obtain  
23  
24 76 more favorable comments <sup>21 22</sup>.

25 77 Measures created by researchers to evaluate the perceived professional benefits  
26  
27 78 of nurses were still in little supply. The Preceptor's Perspective of Benefits and  
28  
29 79 Rewards (PPBR) measure was designed by Dibert and Goldenberg <sup>23</sup> to evaluate the  
30  
31 80 perceived benefits of clinical preceptor nurses, however, it is not relevant to general  
32  
33 81 clinical nurses. A questionnaire entitled Nurses' Perceived Professional Benefits  
34  
35 82 Questionnaire (NPPBQ) was developed to assess how Chinese nurses perceive the  
36  
37 83 gains and benefits of their employment <sup>16 24</sup>. This questionnaire has been utilized in a  
38  
39 84 lot of research to date. While we now have a better grasp of nurses' perceptions of  
40  
41 85 professional benefits, but the heterogeneity of the population is still lack, screening  
42  
43 86 strategies for future precision interventions cannot be developed for identifying low-  
44  
45 87 benefit populations.

46 88 The use of latent profile analysis (LPA) is frequently used to determine the  
47  
48 89 number of subpopulations in a given sample. LPA is a statistical method that use  
49  
50 90 potential category variables to explain the link between exogenous continuous-type  
51  
52 91 indicators, permitting the assessment of the correlation between exogenous indicators  
53  
54 92 and the maintenance of local independence among exogenous indicators <sup>25</sup>.

55  
56 93 To our knowledge, no studies have been conducted using LPA-based analyses of  
57  
58 94 the perceived professional benefits of nurses have been done. The current study was  
59  
60 95 created to bridge that gap. This study's objective was to examine the characteristics

1  
2  
3  
4 96 and determinants of nurses' perceived professional benefits as well as the predictors of  
5 97 these latent profiles.  
6  
7  
8 98

## 99 **2 THE STUDY**

### 100 **2.1 Study design**

101 An online survey was used in this study to conduct a cross-sectional analysis. This  
102 study was designed and reported in accordance with the guidelines for Strengthening  
103 the Reporting of Observational Studies in Epidemiology (STROBE).  
104

### 105 **2.2. Sample size estimation**

106 An examination of the latent profiles of perceived professional benefits among  
107 nurses was conducted in this study. LPA needs a sample size larger than 500<sup>25 26</sup>,  
108 therefore, the minimum sample size for this study was 500.  
109

### 110 **2.3 Participants**

111 Participants in this study required to meet the inclusion criteria and be registered  
112 nurses. To be considered, candidates had to satisfy the following criteria to be  
113 considered: (1) having worked as a nurse in a medical facility for at least one year,  
114 and (2) being willing to participate in this study. The following were the exclusion  
115 criteria: having been diagnosed with a severe psychological or physical disorder.  
116

### 117 **2.4 Instruments**

#### 118 **2.4.1 Demographic**

119 This study gathered and evaluated demographic data including age, gender, greatest  
120 degree of education, marital status, and other participant characteristics.  
121

#### 122 **2.4.2 Nurses' Perceived Professional Benefits Questionnaire (NPPBQ)**

123 The questionnaire was designed by Hu and Liu<sup>16</sup> to investigate the gains and benefits  
124 that nurses perceived from their jobs. The authors then reduced it to 17 items by 2020  
125<sup>24</sup>. The questionnaire has five dimensions: personal growth, a good nurse-patient



1  
2  
3  
4 126 relationship, recognition from family and friends, a positive occupational perception,  
5  
6 127 and team belonging. Items are scored on a 5-point Likert scale (1 = strongly disagree,  
7  
8 128 2 = disagree, 3 = not sure, 4 = agree, 5 = strongly agree). Cronbach's alphas for the  
9  
10 129 questionnaires were 0.94, and the NPPBQ subquestionnaires' alphas were 0.84, 0.83,  
11  
12 130 0.74, 0.79, and 0.85.

13  
14 131

15  
16 132

### 17 133 **2.5 Data collection**

18  
19 134 During the dates of July 6 and July 27, 2022, data was gathered. Wenjuanxing  
20  
21 135 (www.wjx.cn) was used to develop a web-based questionnaire. Wechat was used to  
22  
23 136 send the URL and QR code for the web questionnaire. The survey can be completed  
24  
25 137 by clicking on the link or scanning the QR code.

26  
27 138

### 28 29 139 **2.6 Statistical analyses**

30  
31 140 Latent profile analysis was conducted using Mplus 7.4 software. Log likelihood (LL),  
32  
33 141 Akaike information criterion (AIC), Akaike Information Criterion (BIC), Adjusted  
34  
35 142 Bayesian Information Criteria (aBIC), Entropy, Lo-Mendell-Rubin (LMR), and the  
36  
37 143 Bootstrapped Likelihood Ratio Test (BLRT) were used to assess model fit and  
38  
39 144 determine the appropriate number of categories. In order to decide which model best  
40  
41 145 fit the data, the models from each category's fitting results were combined with the  
42  
43 146 aforementioned indicators. The data was examined using the SPSS 26.0 statistical  
44  
45 147 program. We utilized frequency and composition ratios for categorical data, whereas  
46  
47 148 mean and standard deviation were utilized for continuous variables. The chi-square  
48  
49 149 test was performed to compare category variables across groups. ANOVA was used  
50  
51 150 to compare continuous variables among multiple groups. A multivariate logistic  
52  
53 151 regression model was employed to analyze the variations in demographic variables. A  
54  
55 152 statistically significant difference was indicated by  $p < 0.05$ .

56  
57 153

### 58 59 154 **2.7 Ethical considerations**

60

1  
2  
3  
4 155 The Ethics Committee of the First People's Hospital of Zunyi (2022-016) approved  
5  
6 156 the study, and participants gave permission for data collection. Before to completing  
7  
8 157 the survey, participants will be informed of the major substance of the study and the  
9  
10 158 objective of the investigation, and they will have the option to provide informed  
11  
12 159 consent. In addition, participants were also informed that the study's findings would  
13  
14 160 be given in aggregate form and that no participant could be identified. If a person  
15  
16 161 declined to complete the questionnaire, the collection was immediately ended.  
17  
18 162

### 19 163 **3 RESULTS**

#### 20 164 **3.1 Participant characteristics**

21  
22  
23 165 A total of 1409 nurses completed the questionnaire, while 58 nurses denied  
24  
25 166 participation, for a total number of 1351 questionnaires received. 42 surveys were  
26  
27 167 considered invalid due to insufficient or inaccurate information. 92.9 percent of the  
28  
29 168 final 1309 surveys were correctly returned. The ages of the participants varied from 18  
30  
31 169 to 59 years old, with a mean age of 32.25 (SD: 6.18) years old. The bulk of participants  
32  
33 170 were female (86.7%), whereas the minority were male (3.2%).  
34  
35 171

#### 36 172 **3.2 Characteristics of the different classes**

37  
38  
39 173 On the basis of the NPPBQ's five dimensions, it was established that a model with three  
40  
41 174 latent classes provided the greatest match. Table 1 provides the results. While the AIC  
42  
43 175 and BIC in class 4 were lower in class 4 than in class 3, the entropy was greater;  
44  
45 176 nonetheless, the lowest category probability in class 4 was 1.4%, which is  
46  
47 177 unsatisfactory. As a consequence, we decided that the best-fitting model is class 3.  
48  
49 178 Using a three-class model, Figure 1 illustrates the mean scores for each category within  
50  
51 179 the NPPBQ's dimensions. The percentages increase from class 1 to class 3 as follows:  
52  
53 180 11.8% (155 nurses), 57.1% (747 nurses), and 31.1% (407 nurses). For the sake of  
54  
55 181 brevity, based on the profile scores, we named class 1 as the low perceived professional  
56  
57 182 benefits, class 2 as the moderate perceived professional benefits, and class 3 as the high  
58  
59 183 perceived professional benefits.  
60  
184

### 185 3.3 The scale and dimension scores of different profiles

186 The findings of a one-way ANOVA indicated statistically significant differences in the  
187 scale and dimension scores of different profiles (both  $p < 0.001$ ). The results were shown  
188 in Figure 2 demonstrates the outcomes.

### 190 3.4 Demographic and related characteristics of each profile

191 The ANOVA and chi-square tests indicated statistically significant differences  
192 between the three profiles differed statistically in terms of age, marital status, children,  
193 professional title, job title, working years, and number of night shifts per month. Table  
194 2 is a summary of the results.

195 A multivariate logistic regression model was constructed using the variables with  
196 statistically significant differences as determined by ANOVA and chi-square tests. Of  
197 the three profiles, the class 3 was chosen as a reference to find the predictors linked  
198 with NPPBQ. As shown in Table 3, nurses who were single/divorced/widowed were  
199 more likely to belonged to low perceived professional benefits ( $OR: 1.984$ ,  
200  $95\%CI: 1.028-3.828$ ). The number of night shifts worked per month was associated with  
201 low perceived professional benefits ( $OR: 0.633$ ,  $95\% CI: 0.405-0.988$ ), compared to  
202 those with more than five night shifts, those without night shifts tended to fall into the  
203 high perceived professional benefits. Nurses without a job title were more likely to be  
204 in the moderate perceived professional benefits ( $OR: 1.489$ ,  $95\% CI: 1.028-2.157$ ).  
205 Other variables were not statistically significant in the multivariate logistic regression.

#### 206 4 DISCUSSION

207 The purpose of this research was to identify distinct profiles of nurses' perceived  
208 professional benefits. Furthermore, the current study employed multinomial logistic  
209 regression to investigate predictors of these profiles.

210 In this study, we investigated 1309 nurses who validly completed the questionnaire.  
211 As a result, three latent profiles were identified: low perceived professional benefits,  
212 moderate perceived professional benefits, and high perceived professional benefits. Our  
213 research revealed that the majority of nurses had a moderate or higher levels of  
214 perceived professional benefits, with just 11.8% of nurses belonging to the category of  
215 nurses with low perceived professional benefits. Most studies reported nurses had an  
216 upper-moderate level of perceived professional benefits<sup>27 28</sup>, and our findings are  
217 consistent with those of previous studies.

218 In the last three years, nurses have been a key part of the fight against the COVID-  
219 19 outbreak. Despite heavy job pressure, nurses have had a feeling of professional  
220 calling and value<sup>29</sup>, which has effectively enhanced their sense of professional benefit  
221<sup>12</sup>. At the same time, the critical role of nurses in defending people's lives and health  
222 has earned the society's respect and recognition, as well as a positive social image<sup>30 31</sup>,  
223 which can further enhance nurses' sense of professional benefit. Our survey was  
224 conducted during the COVID-19 epidemic, and nurses' perceptions of professional  
225 benefit may be elevated.

226 Another finding of our study revealed that the membership of profiles can be  
227 predicted by some characteristics such as the number of night shifts, job title, and  
228 marriage status. Nursing is a continuous, 24-hour profession, and nurse's work normally  
229 takes the form of night shifts. It is widely proven that night shifts negatively impact the  
230 physical and emotional health of nurses<sup>32-35</sup>. Nurses working rotating night shifts were  
231 normally younger, and they had the lower scores of job satisfaction, quality of sleep,  
232 and quantity of sleep<sup>36</sup>, these factors resulted in a low perceived professional benefits.  
233 Consistent with past research, our findings indicate that the greater the frequency of  
234 night shifts, the lower the perceived professional benefit<sup>28</sup>.

1  
2  
3  
4 235 The majority of nurses in the moderate perceived professional benefits group  
5  
6 236 lacked a work title, while the majority of nurses in the highly perceived professional  
7  
8 237 benefits group held a job title. This has been validated by other research, and our  
9  
10 238 work provides more support for this notion <sup>28</sup>. Holding a managerial position at a  
11  
12 239 hospital is a means of advancing one's career, and nurses highly value this  
13  
14 240 opportunity.

15  
16 241 Our study found that nurses who were single/divorced/widowed were more  
17  
18 242 likely to belong to low perceived professional benefits, which is consistent with  
19  
20 243 earlier findings <sup>28</sup>. This may be because, unlike single/divorced/widowed nurses,  
21  
22 244 married nurses receive more social support from their spouses and other family  
23  
24 245 members.

25  
26 246 Unfortunately, our research failed to demonstrate that the profiles can be predicted  
27  
28 247 by other factors in the model variables. Our findings in the univariate analysis results  
29  
30 248 were consistent with earlier research. Nevertheless, because the bulk of prior research  
31  
32 249 did not employ multi-factor models, it was impossible to compare our findings could  
33  
34 250 not be compared to those of others. In addition, certain putative contributing elements  
35  
36 251 were not adequately proven, and further research is required to confirm them in the  
37  
38 252 future.

39  
40 253 Professional benefit for nurses is a psychological process that is dynamic and  
41  
42 254 impacted by a number of elements. According to our results, 57.1% of nurses perceived  
43  
44 255 professional benefits as moderate. However, they may perceive low professional  
45  
46 256 benefits as a result of personal, organizational, environmental or social reasons.  
47  
48 257 Although many studies have been conducted to investigate the relationship between  
49  
50 258 professional benefits, professional identity, and burnout, they only make spectacular  
51  
52 259 observations without delving into the mechanisms and theories. As Willetts and Clarke  
53  
54 260 <sup>37</sup> argued, using social identity theory as a research framework may assist in clarifying  
55  
56 261 and describing nurses' professional identities. In order to better understand how nurses  
57  
58 262 perceive the benefits of having a career, it is necessary to develop additional theoretical  
59  
60 263 models.

1  
2  
3  
4 264 Our research has theoretical and practical implications for the future study of  
5  
6 265 nurses' perceived professional benefits. In this survey, we presented a unique  
7  
8 266 perspective and a basis for future research on the perceived career benefits of nurses.  
9  
10 267 Additionally, our research has identified subgroups of registered nurses based on their  
11  
12 268 perceptions of professional benefits and offers treatments based on these findings. It is  
13  
14 269 important to realize that there are many interventions available for addressing job  
15  
16 270 satisfaction <sup>38</sup> and burnout <sup>39</sup>. In the future, further assistance programs targeting  
17  
18 271 perceived professional benefits should be implemented.  
19

20 272

#### 21 273 **4.1 Limitations**

22  
23 274 The research was limited in some ways. First, this was a web-based survey, and the  
24  
25 275 sample process and self-reporting strategy may have resulted in some bias. Second, we  
26  
27 276 only polled nurses in mainland China, and our sample only reflected the current  
28  
29 277 situation in a single nation. Lastly, the constraints of the study's design prohibited an  
30  
31 278 in-depth assessment of the psychological factors behind nurses' perceptions of their  
32  
33 279 professional benefit. As a result, more rigorously designed studies will be required in  
34  
35 280 the future to investigate this issue in depth.  
36

37 281

#### 38 282 **5 CONCLUSION**

39  
40 283 Our study identified three professional benefits profiles among nurses. The results of  
41  
42 284 our study indicated that nurses enjoy a high level of professional benefits.  
43  
44 285 Notwithstanding the study's limitations of the study and the present condition of  
45  
46 286 nursing, it is vital that we engage on several levels to encourage a stable nursing  
47  
48 287 workforce, including policy, organisation, financial income, and career development,  
49  
50 288 so that nurses experience a sense of professional gain.  
51

52 289  
53  
54  
55  
56  
57  
58  
59  
60

1  
2  
3  
4 290 **Acknowledgements**

5 291 None.

6  
7 292

8  
9 293 **CONFLICT OF INTEREST**

10  
11 294 The authors have no conflicts of interest to declare.

12  
13 295

14  
15 296 **AUTHOR CONTRIBUTIONS**

16  
17 297 Jiang Hu and Sun Changli were responsible for the conception and study design. Yao

18  
19 298 Qiangfang, Wang Xianwei and Liu Hanmei performed the data collection. Yao

20  
21 299 Qiangfang, Wang Xianwei and Wen Xueke contributed to the analysis of the data.

22  
23 300 Sun Changli and Jiang Hu were involved in drafting the manuscript and revising it.

24  
25 301 All authors have read and approved the final manuscript.

26  
27 302

28  
29 303 **FUNDING**

30  
31 304 This study was funded by the Science and Technology Fund Project of Guizhou

32  
33 305 Provincial Health and Health Commission (gzwjkj2019-1-030).

34  
35 306  
36  
37  
38  
39  
40  
41  
42  
43  
44  
45  
46  
47  
48  
49  
50  
51  
52  
53  
54  
55  
56  
57  
58  
59  
60

307 **REFERENCES**

- 308 1. Malone B. A Perspective on the State of the World's Nursing Report. *Nurs Adm Q*  
309 2021;**45**(1):6-12.
- 310 2. Ivziku D, de Maria M, Ferramosca FMP, et al. What determines physical, mental and  
311 emotional workloads on nurses? A cross-sectional study. *J Nurs Manag*  
312 2022;**30**(8):4387-97.
- 313 3. Morgan B, Jordan L, Rivera LA. Considerations for an aging nurse anesthetists workforce.  
314 *Geriatr Nurs* 2020;**41**(6):1017-19.
- 315 4. Tamata AT, Mohammadnezhad M. A systematic review study on the factors affecting  
316 shortage of nursing workforce in the hospitals. *Nurs Open* 2023;**10**(3):1247-57.
- 317 5. van der Cingel M, Brouwer J. What makes a nurse today? A debate on the nursing  
318 professional identity and its need for change. *Nurs Philos* 2021;**22**(2):e12343.
- 319 6. Udod S. A Call for Urgent Action: Innovations for Nurse Retention in Addressing the Nursing  
320 Shortage. *Nurs Rep* 2023;**13**(1):145-47.
- 321 7. National Bureau of Statistics of China. China Statistical Yearbook. Secondary China  
322 Statistical Yearbook 2022. <http://www.stats.gov.cn/sj/ndsj/2022/indexch.htm>.
- 323 8. Zeng LN, Zhang JW, Zong QQ, et al. Prevalence of burnout in mental health nurses in China:  
324 A meta-analysis of observational studies. *Arch Psychiatr Nurs* 2020;**34**(3):141-48.
- 325 9. Chen JP, Dai YM, Qin Y, et al. Factors influencing turnover intention among male nurses in  
326 China: A large-scale descriptive correlational study. *Int Nurs Rev* 2023.
- 327 10. Yu JF, Ding YM, Jia RY, et al. Professional identity and emotional labour affect the  
328 relationship between perceived organisational justice and job performance among  
329 Chinese hospital nurses. *J Nurs Manag* 2022;**30**(5):1252-62.



- 1  
2  
3  
4 330 11. Lin L, Liu X, He G. Mindfulness and Job Satisfaction Among Hospital Nurses: The Mediating  
5  
6 331 Roles of Positive Affect and Resilience. *J Psychosoc Nurs Ment Health Serv*  
7  
8  
9 332 2020;**58**(6):46-55.  
10  
11 333 12. Wang X, Chen F, Dai P, et al. Perceived professional benefits and associated factors  
12  
13  
14 334 among nurses during the COVID-19 pandemic: A cross-sectional study. *Nurs Open*  
15  
16  
17 335 2023;**10**(3):1461-70.  
18  
19 336 13. Jiang H, Huang N, Tian W, et al. Factors Associated With Post-traumatic Stress Disorder  
20  
21  
22 337 Among Nurses During COVID-19. *Front Psychol* 2022;**13**:745158.  
23  
24 338 14. Liu S, Duan X, Han P, et al. Occupational benefit perception of acute and critical care nurses:  
25  
26  
27 339 A qualitative meta-synthesis. *Front Public Health* 2022;**10**:976146.  
28  
29 340 15. Zhou H, Zhu Y, Zhang X, et al. Psychological Capital and Perceived Professional Benefits:  
30  
31  
32 341 Testing the Mediating Role of Perceived Nursing Work Environment Among Chinese  
33  
34  
35 342 Nurses. *J Psychosoc Nurs Ment Health Serv* 2018;**56**(4):38-47.  
36  
37 343 16. Hu J, Liu X. The preparation of nurses' occupational benefit questionnaire and its reliability  
38  
39  
40 344 and validity test [J]. *J Chin People's Liberation Army* 2013;**30**(22):1-5.  
41  
42 345 17. Macey A, Green C, Jarden RJ. ICU nurse preceptors' perceptions of benefits, rewards,  
43  
44  
45 346 supports and commitment to the preceptor role: A mixed-methods study. *Nurse Educ*  
46  
47  
48 347 *Pract* 2021;**51**:102995.  
49  
50 348 18. Natan MB, Qeadan H, Egbaria W. The commitment of Israeli nursing preceptors to the role  
51  
52  
53 349 of preceptor. *Nurse Educ Today* 2014;**34**(12):1425-9.  
54  
55 350 19. Zheng RS, Guo QH, Dong FQ, et al. Chinese oncology nurses' experience on caring for  
56  
57  
58 351 dying patients who are on their final days: a qualitative study. *Int J Nurs Stud*  
59  
60

- 1  
2  
3  
4 352 2015;**52**(1):288-96.  
5  
6  
7 353 20. Christiansen A, Vernon V, Jinks A. Perceptions of the benefits and challenges of the role of  
8  
9 354 advanced practice nurses in nurse-led out-of-hours care in Hong Kong: a questionnaire  
10  
11 355 study. *J Clin Nurs* 2013;**22**(7-8):1173-81.  
12  
13  
14 356 21. Wu B, Zhao Y, Xu D, et al. Factors associated with nurses' willingness to participate in care  
15  
16 357 of patients with COVID-19: A survey in China. *J Nurs Manag* 2020;**28**(7):1704-12.  
17  
18  
19 358 22. Liu X, Ju X, Liu X. The relationship between resilience and intent to stay among Chinese  
20  
21 359 nurses to support Wuhan in managing COVID-19: The serial mediation effect of post-  
22  
23 360 traumatic growth and perceived professional benefits. *Nurs Open* 2021;**8**(5):2866-76.  
24  
25  
26  
27 361 23. Dibert C, Goldenberg D. Preceptors' perceptions of benefits, rewards, supports and  
28  
29 362 commitment to the preceptor role. *J Adv Nurs* 1995;**21**(6):1144-51.  
30  
31  
32 363 24. Hu Y, Hu J, Li L, et al. Development and preliminary validation of a brief nurses' perceived  
33  
34 364 professional benefit questionnaire (NPPBQ). *BMC Med Res Methodol* 2020;**20**(1):18.  
35  
36  
37  
38 365 25. Spurk D, Hirschi A, Wang M, et al. Latent profile analysis: A review and "how to" guide of  
39  
40 366 its application within vocational behavior research. *Journal of vocational behavior*  
41  
42 367 2020;**120**:103445.  
43  
44  
45 368 26. Nylund KL, Asparouhov T, Muthén BO. Deciding on the number of classes in latent class  
46  
47 369 analysis and growth mixture modeling: A Monte Carlo simulation study. *Structural*  
48  
49 370 *equation modeling: A multidisciplinary Journal* 2007;**14**(4):535-69.  
50  
51  
52  
53 371 27. Ma HW, Dan X, Xu SH, et al. [Current status of nurses' perceived professional benefits and  
54  
55 372 influencing factors in 3A-level hospitals in Tianjin]. *Zhonghua Lao Dong Wei Sheng Zhi*  
56  
57 373 *Ye Bing Za Zhi* 2017;**35**(6):443-47.  
58  
59  
60

- 1  
2  
3  
4 374 28. Zhan T, Li H, Ding X. Can social support enhance sense of coherence and perceived  
5  
6 375 professional benefits among Chinese registered nurses? A mediation model. *J Nurs*  
7  
8  
9 376 *Manag* 2020;**28**(3):488-94.
- 10  
11 377 29. Savitsky B, Radomislensky I, Hendel T. Nurses' occupational satisfaction during Covid-19  
12  
13  
14 378 pandemic. *Appl Nurs Res* 2021;**59**:151416.
- 15  
16  
17 379 30. Mohammed S, Peter E, Killackey T, et al. The "nurse as hero" discourse in the COVID-19  
18  
19 380 pandemic: A poststructural discourse analysis. *Int J Nurs Stud* 2021;**117**:103887.
- 20  
21  
22 381 31. Begnini D, Cicoella DA, Freitas KR, et al. Heroines in Covid-19 times: visibility of nursing  
23  
24 382 in the pandemic. *Rev Gaucha Enferm* 2021;**42**(spe):e20200373.
- 25  
26  
27 383 32. James L, Elkins-Brown N, Wilson M, et al. The effects of three consecutive 12-hour shifts  
28  
29 384 on cognition, sleepiness, and domains of nursing performance in day and night shift  
30  
31 385 nurses: A quasi-experimental study. *Int J Nurs Stud* 2021;**123**:104041.
- 32  
33  
34 386 33. Weaver SH, de Cordova PB, Vitale TR, et al. Experiences and perceptions of nurses  
35  
36 387 working night shift: a qualitative systematic review. *JBI Evid Synth* 2023;**21**(1):33-97.
- 37  
38  
39 388 34. Borroni E, Frigerio G, Polledri E, et al. Metabolomic profiles in night shift workers: A cross-  
40  
41 389 sectional study on hospital female nurses. *Front Public Health* 2023;**11**:1082074.
- 42  
43  
44 390 35. Jørgensen JT, Rozing MP, Westendorp RGJ, et al. Shift work and incidence of psychiatric  
45  
46 391 disorders: The Danish Nurse Cohort study. *J Psychiatr Res* 2021;**139**:132-38.
- 47  
48  
49 392 36. Ferri P, Guadi M, Marcheselli L, et al. The impact of shift work on the psychological and  
50  
51 393 physical health of nurses in a general hospital: a comparison between rotating night  
52  
53 394 shifts and day shifts. *Risk Manag Healthc Policy* 2016;**9**:203-11.
- 54  
55  
56  
57  
58 395 37. Willetts G, Clarke D. Constructing nurses' professional identity through social identity theory.  
59  
60

1  
2  
3  
4 396 *Int J Nurs Pract* 2014;**20**(2):164-69.

5  
6 397 38. Niskala J, Kanste O, Tomietto M, et al. Interventions to improve nurses' job satisfaction: A  
7  
8  
9 398 systematic review and meta-analysis. *J Adv Nurs* 2020;**76**(7):1498-508.

10  
11 399 39. Lee HF, Kuo CC, Chien TW, et al. A Meta-Analysis of the Effects of Coping Strategies on  
12  
13  
14 400 Reducing Nurse Burnout. *Appl Nurs Res* 2016;**31**:100-10.

15  
16  
17 401  
18  
19  
20  
21  
22  
23  
24  
25  
26  
27  
28  
29  
30  
31  
32  
33  
34  
35  
36  
37  
38  
39  
40  
41  
42  
43  
44  
45  
46  
47  
48  
49  
50  
51  
52  
53  
54  
55  
56  
57  
58  
59  
60

For peer review only

**Table 1** Potential profile analysis indicators (N=1309)

| Model   | LL <sup>a</sup> | AIC <sup>b</sup> | BIC <sup>c</sup> | aBIC <sup>d</sup> | Entropy | LMR <sup>e</sup><br><i>p</i> -value | BLRT <sup>f</sup><br><i>p</i> -value | Category probability    |
|---------|-----------------|------------------|------------------|-------------------|---------|-------------------------------------|--------------------------------------|-------------------------|
| Class 1 | -14709.353      | 29438.706        | 29490.476        | 29458.711         | -       | -                                   | -                                    | -                       |
| Class 2 | -13420.425      | 26872.850        | 26955.682        | 26904.857         | 0.905   | < 0.001                             | < 0.001                              | 0.654/0.346             |
| Class 3 | -12583.629      | 25211.257        | 25325.152        | 25255.268         | 0.936   | 0.007                               | < 0.001                              | 0.118/0.571/0.311       |
| Class 4 | -12307.807      | 24671.613        | 24816.570        | 24727.627         | 0.940   | 0.036                               | < 0.001                              | 0.151/0.014/0.530/0.306 |

a Akaike information criterion, b Bayesian information criterion, c Sample adjusted bayesian information criterion, d Lo-Mendell-Rubin Likelihood Ratio Test, f Bootstrapped Likelihood Ratio Test.

**Table 2** Demographic and characteristics by latent profile (N=1309)

| Variables                | Class 1      | Class 2      | Class 3      | $\chi^2/F$ | <i>p</i> |
|--------------------------|--------------|--------------|--------------|------------|----------|
| Age (SD)                 | 30.94 (5.37) | 31.76 (5.91) | 33.64 (6.71) | 16.545     | < 0.001  |
| Gender                   |              |              |              | 0.600      | 0.741    |
| Male                     | 6 (3.9)      | 25 (3.3)     | 11 (2.7)     |            |          |
| Female                   | 149 (96.1)   | 722 (96.7)   | 396 (97.3)   |            |          |
| Highest Degree           |              |              |              | 1.602      | 0.449    |
| Junior college and below | 29 (18.7)    | 111 (14.9)   | 60 (14.7)    |            |          |
| Bachelor's and above     | 126 (81.3)   | 636 (85.1)   | 347 (85.3)   |            |          |
| Marital status           |              |              |              | 25.768     | < 0.001  |
| Single/divorced/widowed  | 62 (40.0)    | 218 (29.2)   | 80 (19.7)    |            |          |
| Married                  | 93 (60.0)    | 529 (70.8)   | 327 (80.3)   |            |          |
| Children                 |              |              |              | 26.943     | < 0.001  |
| Yes                      | 87 (56.1)    | 481 (64.4)   | 311 (76.4)   |            |          |
| No                       | 68 (43.9)    | 266 (35.6)   | 96 (23.6)    |            |          |

1  
2  
3  
4  
5  
6  
7  
8  
9  
10  
11  
12  
13  
14  
15  
16  
17  
18  
19  
20  
21  
22  
23  
24  
25  
26  
27  
28  
29  
30  
31  
32  
33  
34  
35  
36  
37  
38  
39  
40  
41  
42  
43  
44  
45  
46

|                               |            |            |            |        |         |
|-------------------------------|------------|------------|------------|--------|---------|
| Professional title            |            |            |            | 23.589 | < 0.001 |
| Junior Level                  | 102 (65.8) | 448 (60.0) | 207 (50.9) |        |         |
| Intermediate level            | 50 (32.3)  | 280 (37.5) | 172 (42.3) |        |         |
| Senior level                  | 3 (1.9)    | 19 (2.5)   | 28 (6.9)   |        |         |
| Job title                     |            |            |            | 17.086 | < 0.001 |
| Yes                           | 18 (11.6)  | 86 (11.5)  | 82 (20.1)  |        |         |
| No                            | 137 (88.4) | 661 (88.5) | 325 (79.9) |        |         |
| Working years (years)         |            |            |            | 32.903 | < 0.001 |
| ≤5                            | 52 (33.5)  | 217 (29.0) | 79 (19.4)  |        |         |
| 6–15                          | 91 (58.7)  | 438 (58.6) | 241 (59.2) |        |         |
| ≥16                           | 12 (7.7)   | 92 (12.3)  | 87 (21.4)  |        |         |
| Average monthly income (yuan) |            |            |            | 7.990  | 0.239   |
| ≤3000                         | 23 (14.8)  | 75 (10.0)  | 43 (10.6)  |        |         |
| 3001~6000                     | 93 (60.0)  | 415 (55.6) | 217 (53.3) |        |         |
| 6001~9000                     | 27 (17.4)  | 179 (24.0) | 105 (25.8) |        |         |

For peer review only

|    |                            |           |            |            |        |
|----|----------------------------|-----------|------------|------------|--------|
| 1  |                            |           |            |            |        |
| 2  |                            |           |            |            |        |
| 3  |                            |           |            |            |        |
| 4  |                            |           |            |            |        |
| 5  | ≥9001                      | 12 (7.7)  | 78 (10.4)  | 42 (10.3)  |        |
| 6  |                            |           |            |            |        |
| 7  | Number of night shifts per |           |            |            |        |
| 8  | month                      |           |            |            | 17.797 |
| 9  |                            |           |            |            | 0.001  |
| 10 | 0                          | 42 (27.1) | 233 (31.2) | 164 (40.3) |        |
| 11 |                            |           |            |            |        |
| 12 | 1-4                        | 22 (14.2) | 143 (19.1) | 73 (17.9)  |        |
| 13 |                            |           |            |            |        |
| 14 | ≥5                         | 91 (58.7) | 371 (49.7) | 170 (41.8) |        |
| 15 |                            |           |            |            |        |
| 16 | <hr/>                      |           |            |            |        |
| 17 |                            |           |            |            |        |
| 18 |                            |           |            |            |        |
| 19 |                            |           |            |            |        |
| 20 |                            |           |            |            |        |
| 21 |                            |           |            |            |        |
| 22 |                            |           |            |            |        |
| 23 |                            |           |            |            |        |
| 24 |                            |           |            |            |        |
| 25 |                            |           |            |            |        |
| 26 |                            |           |            |            |        |
| 27 |                            |           |            |            |        |
| 28 |                            |           |            |            |        |
| 29 |                            |           |            |            |        |
| 30 |                            |           |            |            |        |
| 31 |                            |           |            |            |        |
| 32 |                            |           |            |            |        |
| 33 |                            |           |            |            |        |
| 34 |                            |           |            |            |        |
| 35 |                            |           |            |            |        |
| 36 |                            |           |            |            |        |
| 37 |                            |           |            |            |        |
| 38 |                            |           |            |            |        |
| 39 |                            |           |            |            |        |
| 40 |                            |           |            |            |        |
| 41 |                            |           |            |            |        |
| 42 |                            |           |            |            |        |
| 43 |                            |           |            |            |        |
| 44 |                            |           |            |            |        |
| 45 |                            |           |            |            |        |
| 46 |                            |           |            |            |        |



**Table 3** Predictors of latent profile membership

| Variables               | Class 1 VS Class 3 |           |               | Class 2 VS Class 3 |           |               |
|-------------------------|--------------------|-----------|---------------|--------------------|-----------|---------------|
|                         | $\beta$            | <i>OR</i> | 95% <i>CI</i> | $\beta$            | <i>OR</i> | 95% <i>CI</i> |
| Age (SD)                | 0.004              | 1.004     | 0.941-1.070   | -0.005             | 0.995     | 0.957-1.034   |
| Marital status          |                    |           |               |                    |           |               |
| Single/divorced/widowed | 0.685              | 1.984*    | 1.028-3.828   | 0.115              | 1.122     | 0.716-1.760   |
| Married (Ref)           |                    |           |               |                    |           |               |
| Children                |                    |           |               |                    |           |               |
| No                      | 0.177              | 1.194     | 0.622-2.293   | 0.240              | 1.272     | 0.822-1.967   |
| Yes (Ref)               |                    |           |               |                    |           |               |
| Professional title      |                    |           |               |                    |           |               |
| Junior Level            | 0.368              | 1.444     | 0.334-6.241   | 0.359              | 1.433     | 0.661-3.105   |
| Intermediate level      | 0.378              | 1.460     | 0.370-5.766   | 0.429              | 1.535     | 0.764-3.085   |
| Senior level (Ref)      |                    |           |               |                    |           |               |
| Job title               |                    |           |               |                    |           |               |
| No                      | 0.139              | 1.984     | 1.028-3.828   | 0.398              | 1.489*    | 1.028-2.157   |

|    |                            |        |        |             |        |       |             |
|----|----------------------------|--------|--------|-------------|--------|-------|-------------|
| 1  |                            |        |        |             |        |       |             |
| 2  |                            |        |        |             |        |       |             |
| 3  |                            |        |        |             |        |       |             |
| 4  |                            |        |        |             |        |       |             |
| 5  | Yes (Ref)                  |        |        |             |        |       |             |
| 6  |                            |        |        |             |        |       |             |
| 7  | Working years (years)      |        |        |             |        |       |             |
| 8  |                            |        |        |             |        |       |             |
| 9  | ≤5                         | 0.781  | 2.184  | 0.666-7.161 | 0.411  | 1.508 | 0.748-3.042 |
| 10 |                            |        |        |             |        |       |             |
| 11 | 6–15                       | 0.721  | 2.057  | 0.847-5.000 | 0.228  | 1.256 | 0.773-2.039 |
| 12 |                            |        |        |             |        |       |             |
| 13 | ≥16 (Ref)                  |        |        |             |        |       |             |
| 14 |                            |        |        |             |        |       |             |
| 15 | Number of night shifts per |        |        |             |        |       |             |
| 16 | month                      |        |        |             |        |       |             |
| 17 |                            |        |        |             |        |       |             |
| 18 | 0                          | -0.458 | 0.633* | 0.405-0.988 | -0.223 | 0.800 | 0.601-1.064 |
| 19 |                            |        |        |             |        |       |             |
| 20 | 1–4                        | -0.354 | 0.702  | 0.400-1.231 | 0.089  | 1.094 | 0.768-1.558 |
| 21 |                            |        |        |             |        |       |             |
| 22 | ≥5 (Ref)                   |        |        |             |        |       |             |
| 23 |                            |        |        |             |        |       |             |

\* $p < 0.05$ ; OR, Odds ratio; 95% CI, 95% Confidence Interval; Ref, Reference.

1  
2  
3  
4  
5  
6  
7  
8  
9  
10  
11  
12  
13  
14  
15  
16  
17  
18  
19  
20  
21  
22  
23  
24  
25  
26  
27  
28  
29  
30  
31  
32  
33  
34  
35  
36  
37  
38  
39  
40  
41  
42  
43  
44  
45  
46  
47  
48  
49  
50  
51  
52  
53  
54  
55  
56  
57  
58  
59  
60

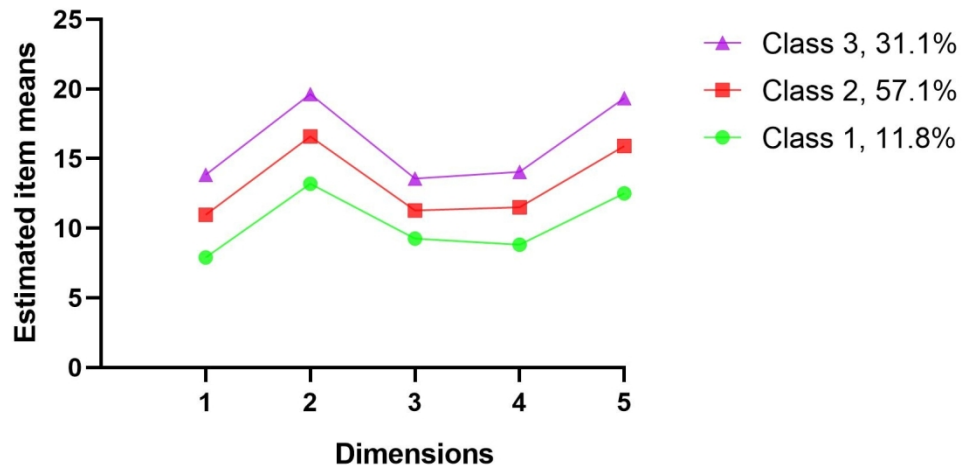

Latent profiles of NPPBQ  
145x76mm (300 x 300 DPI)

1  
2  
3  
4  
5  
6  
7  
8  
9  
10  
11  
12  
13  
14  
15  
16  
17  
18  
19  
20  
21  
22  
23  
24  
25  
26  
27  
28  
29  
30  
31  
32  
33  
34  
35  
36  
37  
38  
39  
40  
41  
42  
43  
44  
45  
46  
47  
48  
49  
50  
51  
52  
53  
54  
55  
56  
57  
58  
59  
60

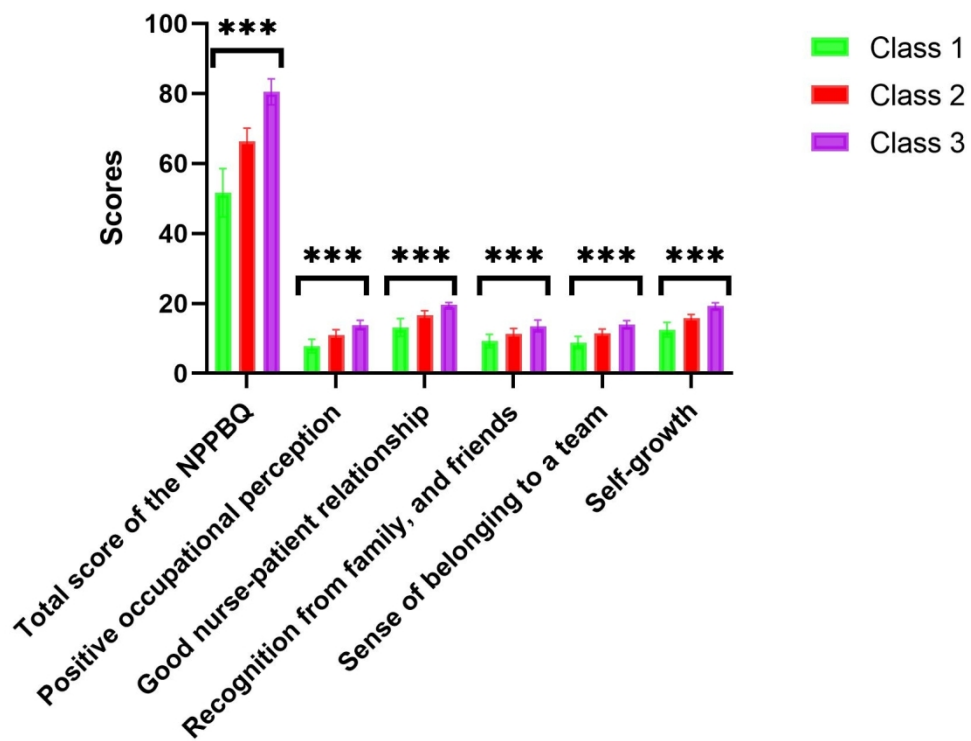

The scale and dimension scores of different profiles

145x114mm (300 x 300 DPI)

STROBE Statement—Checklist of items that should be included in reports of *cross-sectional studies*

|                              | Item No | Recommendation                                                                                                                                                                                               | Page No |
|------------------------------|---------|--------------------------------------------------------------------------------------------------------------------------------------------------------------------------------------------------------------|---------|
| <b>Title and abstract</b>    | 1       | (a) Indicate the study's design with a commonly used term in the title or the abstract                                                                                                                       | 2       |
|                              |         | (b) Provide in the abstract an informative and balanced summary of what was done and what was found                                                                                                          | 2       |
| <b>Introduction</b>          |         |                                                                                                                                                                                                              |         |
| Background/rationale         | 2       | Explain the scientific background and rationale for the investigation being reported                                                                                                                         | 3-4     |
| Objectives                   | 3       | State specific objectives, including any prespecified hypotheses                                                                                                                                             | 4-5     |
| <b>Methods</b>               |         |                                                                                                                                                                                                              |         |
| Study design                 | 4       | Present key elements of study design early in the paper                                                                                                                                                      | 5       |
| Setting                      | 5       | Describe the setting, locations, and relevant dates, including periods of recruitment, exposure, follow-up, and data collection                                                                              | 5       |
| Participants                 | 6       | (a) Give the eligibility criteria, and the sources and methods of selection of participants                                                                                                                  | 5       |
| Variables                    | 7       | Clearly define all outcomes, exposures, predictors, potential confounders, and effect modifiers. Give diagnostic criteria, if applicable                                                                     | 5-6     |
| Data sources/<br>measurement | 8*      | For each variable of interest, give sources of data and details of methods of assessment (measurement). Describe comparability of assessment methods if there is more than one group                         | 5-6     |
| Bias                         | 9       | Describe any efforts to address potential sources of bias                                                                                                                                                    | 6       |
| Study size                   | 10      | Explain how the study size was arrived at                                                                                                                                                                    | 5       |
| Quantitative variables       | 11      | Explain how quantitative variables were handled in the analyses. If applicable, describe which groupings were chosen and why                                                                                 | 5-6     |
| Statistical methods          | 12      | (a) Describe all statistical methods, including those used to control for confounding                                                                                                                        | 6       |
|                              |         | (b) Describe any methods used to examine subgroups and interactions                                                                                                                                          | NA      |
|                              |         | (c) Explain how missing data were addressed                                                                                                                                                                  | NA      |
|                              |         | (d) If applicable, describe analytical methods taking account of sampling strategy                                                                                                                           | NA      |
|                              |         | (e) Describe any sensitivity analyses                                                                                                                                                                        | NA      |
| <b>Results</b>               |         |                                                                                                                                                                                                              |         |
| Participants                 | 13*     | (a) Report numbers of individuals at each stage of study—eg numbers potentially eligible, examined for eligibility, confirmed eligible, included in the study, completing follow-up, and analysed            | 7       |
|                              |         | (b) Give reasons for non-participation at each stage                                                                                                                                                         | 7       |
|                              |         | (c) Consider use of a flow diagram                                                                                                                                                                           | NA      |
| Descriptive data             | 14*     | (a) Give characteristics of study participants (eg demographic, clinical, social) and information on exposures and potential confounders                                                                     | 7       |
|                              |         | (b) Indicate number of participants with missing data for each variable of interest                                                                                                                          | NA      |
| Outcome data                 | 15*     | Report numbers of outcome events or summary measures                                                                                                                                                         | 8       |
| Main results                 | 16      | (a) Give unadjusted estimates and, if applicable, confounder-adjusted estimates and their precision (eg, 95% confidence interval). Make clear which confounders were adjusted for and why they were included | NA      |

|                          |    |                                                                                                                                                                            |      |
|--------------------------|----|----------------------------------------------------------------------------------------------------------------------------------------------------------------------------|------|
|                          |    | (b) Report category boundaries when continuous variables were categorized                                                                                                  | 8    |
|                          |    | (c) If relevant, consider translating estimates of relative risk into absolute risk for a meaningful time period                                                           | NA   |
| Other analyses           | 17 | Report other analyses done—eg analyses of subgroups and interactions, and sensitivity analyses                                                                             | NA   |
| <b>Discussion</b>        |    |                                                                                                                                                                            |      |
| Key results              | 18 | Summarise key results with reference to study objectives                                                                                                                   | 9-11 |
| Limitations              | 19 | Discuss limitations of the study, taking into account sources of potential bias or imprecision. Discuss both direction and magnitude of any potential bias                 | 11   |
| Interpretation           | 20 | Give a cautious overall interpretation of results considering objectives, limitations, multiplicity of analyses, results from similar studies, and other relevant evidence | 11   |
| Generalisability         | 21 | Discuss the generalisability (external validity) of the study results                                                                                                      | 11   |
| <b>Other information</b> |    |                                                                                                                                                                            |      |
| Funding                  | 22 | Give the source of funding and the role of the funders for the present study and, if applicable, for the original study on which the present article is based              | 12   |

\*Give information separately for exposed and unexposed groups.

**Note:** An Explanation and Elaboration article discusses each checklist item and gives methodological background and published examples of transparent reporting. The STROBE checklist is best used in conjunction with this article (freely available on the Web sites of PLoS Medicine at <http://www.plosmedicine.org/>, Annals of Internal Medicine at <http://www.annals.org/>, and Epidemiology at <http://www.epidem.com/>). Information on the STROBE Initiative is available at [www.strobe-statement.org](http://www.strobe-statement.org).

# BMJ Open

## Latent profile analysis of nurses' perceived professional benefits in China: a cross-sectional study

|                                 |                                                                                                                                                                                                                                                                                                                                                                                  |
|---------------------------------|----------------------------------------------------------------------------------------------------------------------------------------------------------------------------------------------------------------------------------------------------------------------------------------------------------------------------------------------------------------------------------|
| Journal:                        | <i>BMJ Open</i>                                                                                                                                                                                                                                                                                                                                                                  |
| Manuscript ID                   | bmjopen-2023-078051.R1                                                                                                                                                                                                                                                                                                                                                           |
| Article Type:                   | Original research                                                                                                                                                                                                                                                                                                                                                                |
| Date Submitted by the Author:   | 04-Oct-2023                                                                                                                                                                                                                                                                                                                                                                      |
| Complete List of Authors:       | Sun, Changli; Third Affiliated Hospital of Zunyi Medical University<br>Jiang, Hu; Zunyi Medical University<br>Yao, Qingfang; The Third Affiliated Hospital of Zunyi Medical University<br>Wang, Xianwei; The Third Affiliated Hospital of Zunyi Medical University<br>Wen, Xueke; Third Affiliated Hospital of Zunyi Medical University<br>Liu, Hanmei; Zunyi Medical University |
| <b>Primary Subject Heading</b>: | Occupational and environmental medicine                                                                                                                                                                                                                                                                                                                                          |
| Secondary Subject Heading:      | Nursing, Occupational and environmental medicine                                                                                                                                                                                                                                                                                                                                 |
| Keywords:                       | Burnout, Professional, Burnout, China                                                                                                                                                                                                                                                                                                                                            |
|                                 |                                                                                                                                                                                                                                                                                                                                                                                  |

SCHOLARONE™  
Manuscripts



I, the Submitting Author has the right to grant and does grant on behalf of all authors of the Work (as defined in the below author licence), an exclusive licence and/or a non-exclusive licence for contributions from authors who are: i) UK Crown employees; ii) where BMJ has agreed a CC-BY licence shall apply, and/or iii) in accordance with the terms applicable for US Federal Government officers or employees acting as part of their official duties; on a worldwide, perpetual, irrevocable, royalty-free basis to BMJ Publishing Group Ltd ("BMJ") its licensees and where the relevant Journal is co-owned by BMJ to the co-owners of the Journal, to publish the Work in this journal and any other BMJ products and to exploit all rights, as set out in our [licence](#).

The Submitting Author accepts and understands that any supply made under these terms is made by BMJ to the Submitting Author unless you are acting as an employee on behalf of your employer or a postgraduate student of an affiliated institution which is paying any applicable article publishing charge ("APC") for Open Access articles. Where the Submitting Author wishes to make the Work available on an Open Access basis (and intends to pay the relevant APC), the terms of reuse of such Open Access shall be governed by a Creative Commons licence – details of these licences and which [Creative Commons](#) licence will apply to this Work are set out in our licence referred to above.

Other than as permitted in any relevant BMJ Author's Self Archiving Policies, I confirm this Work has not been accepted for publication elsewhere, is not being considered for publication elsewhere and does not duplicate material already published. I confirm all authors consent to publication of this Work and authorise the granting of this licence.



1  
2  
3  
4 **1 Latent profile analysis of nurses' perceived professional benefits in**  
5  
6 **2 China: a cross-sectional study**  
7  
8  
9 **3 Running Head: LPA of nurses' perceived professional benefits**  
10  
11  
12

13  
14 5 Changli Sun<sup>1</sup>, Hu Jiang<sup>1\*</sup>, Qingfang Yao<sup>2</sup>, Xianwei Wang<sup>2</sup>, Xueke Wen<sup>1</sup> and Hanmei  
15  
16 6 Liu<sup>2</sup>,

17  
18 7 <sup>1</sup> The Third Affiliated Hospital of Zunyi Medical University (The First People's Hospital of  
19  
20 8 Zunyi), Zunyi, Guizhou, China

21  
22 9 <sup>2</sup> Zunyi Medical University, Zunyi, Guizhou, China

23  
24 10 \*Correspondence: [jianghuchn@163.com](mailto:jianghuchn@163.com), Nursing Department, The Third Affiliated  
25  
26 11 Hospital of Zunyi Medical University (The First People's Hospital of Zunyi), Zunyi,  
27  
28 12 Guizhou, China

29  
30  
31  
32  
33  
34  
35  
36  
37  
38  
39  
40  
41  
42  
43  
44  
45  
46  
47  
48  
49  
50  
51  
52  
53  
54  
55  
56  
57  
58  
59  
60

1  
2  
3  
4 14 **Latent profile analysis of nurses' perceived professional benefits in**  
5  
6  
7 15 **China: a cross-sectional study**

8  
9 16 **ABSTRACT**

10 17 **Objective:** To identify profiles of nurses' perceived professional benefits as well as  
11  
12  
13 18 their predictors.

14  
15 19 **Design:** Cross-sectional study.

16  
17 20 **Setting:** The study was carried out online in China.

18  
19 21 **Methods:** From July 6 and July 27, 2022, a total of 1,309 registered nurses participated  
20  
21  
22 22 in the survey by convenient sampling. We collected the Nurses' Perceived Professional  
23  
24 23 Benefits Questionnaire (NPPBQ) and demographic data. Using latent profile analysis  
25  
26 24 (LPA), subgroups of nurses' perceived professional benefits were identified. Moreover,  
27  
28 25 univariate and multinomial logistic regression analysis were conducted to find the  
29  
30 26 factors that were linked with the profiles.

31  
32 27 **Results:** The survey was validly completed by 1309 nurses, with a 92.9% effective  
33  
34 28 return rate. The findings of the LPA demonstrated three unique profiles: low perceived  
35  
36 29 professional benefits (11.8%), moderate perceived professional benefits (57.1%), and  
37  
38 30 high perceived professional benefits (31.1%). There was a correlation between marital  
39  
40 31 status, the number of night shifts per month, and leadership role.

41  
42 32 **Conclusions:** According to our research, registered nurses have three unique  
43  
44 33 professional benefit profiles. In order to sustain the nursing workforce, despite the fact  
45  
46 34 that nurses get a high level of professional benefits, interventions are necessary to  
47  
48 35 increase nurses' perception of their professional value.

49  
50 36  
51 37 **Keywords:** nurse, perceived professional benefits, latent profile analysis, cross-  
52  
53 38 sectional study

54  
55  
56 40 **Strengths and limitations of this study:**

- 57  
58 41 ● A total of 1,309 registered nurses participated in the survey across the country.  
59  
60 42 ● Three unique professional benefit profiles and influencing factors were found

1  
2  
3  
4 43 among nurses.

5 44 ● The generalization of this study was limited by the web-based cross-sectional

6  
7 45 design and convenient sampling method.  
8  
9  
10  
11  
12  
13  
14  
15  
16  
17  
18  
19  
20  
21  
22  
23  
24  
25  
26  
27  
28  
29  
30  
31  
32  
33  
34  
35  
36  
37  
38  
39  
40  
41  
42  
43  
44  
45  
46  
47  
48  
49  
50  
51  
52  
53  
54  
55  
56  
57  
58  
59  
60

For peer review only

## 46 INTRODUCTION

47 Despite the fact that nursing is a high-risk, high-stress profession, nurses are able  
48 to achieve benefit findings [1-3]. In recent years, the concept of nurses' perceived  
49 professional benefits arises naturally, and has gradually attracted the attention of  
50 researchers. Nurses' perceived professional benefits (NPPB) refer to nurses'  
51 perceptions of the gains and benefits they receive in their profession during the hiring  
52 process, as well as their belief that working in nursing can promote their overall  
53 growth and development [4, 5]. Essentially, perceived professional benefits can be  
54 classified as an emotional experience and cognitive evaluation, which has two  
55 aspects: actual benefits and spiritual benefits [4]. However, there is a lack of in-depth  
56 research on the group heterogeneity of perceived professional benefits among nurse  
57 populations.

### 58 Background

59 It is estimated that 69% of the global health workforce consists of nurses [6].  
60 Yet, the present physical and mental health of nurses is not encouraging, as they  
61 confront high levels of stress, burnout, turnover, and their own ageing [7-9]. Nursing  
62 is no longer a desirable and appealing profession [10], which makes nurse shortages a  
63 widespread worldwide concern [11]. These issues have a direct bearing on the  
64 sustainability and continued growth of the nursing workforce. In recent years, nursing  
65 in China has experienced remarkable growth, and the most recent statistics indicate  
66 that China has more than 5 million registered nurses [12]. Chinese nurses are  
67 extremely susceptible to burnout, and a high desire to leave is a serious concern [13,  
68 14]. However, there is a dearth of comprehensive study and viable remedies.

69 The mental health of nurses is receiving increasing attention from managers and  
70 researchers in the context of positive psychology. It is beginning to be recognized that  
71 nurses' own positive psychology promotes job satisfaction and professional identity,  
72 lessens burnout, and hence reduces turnover rates [15, 16].

73 The profession of nursing can be beneficial to nurses in a number of ways.  
74 Previous studies [17, 18] reported that nursing preceptorship offers many benefits,  
75 and nurses may find themselves being more committed to the position as a result. A

1  
2  
3  
4 76 qualitative study [19] found that nurses who were involved in caring for dying  
5  
6 77 patients got a great lot of experience and benefited considerably; they can create a  
7  
8 78 personal philosophy on death and life, in addition to professional growth. Nurses who  
9  
10 79 served as advanced practice nurse roles perceived numerous benefits, including  
11  
12 80 improved patient care quality and safety, professionalism, personal development,  
13  
14 81 career development, intrinsic satisfaction with the role, and impact on other  
15  
16 82 professional groups [20]. A person's perception of professional benefit is an  
17  
18 83 endogenous motivation for his or her development and has a positive effect on that  
19  
20 84 person's career. According to prior studies, improving the perceived professional  
21  
22 85 benefit of nurses reduces burnout reduction and enables nurses to approach their work  
23  
24 86 with a good attitude and obtain more favorable comments [21, 22].

25 87 Measures created by researchers to evaluate the perceived professional benefits  
26  
27 88 of nurses were still in little supply. The Preceptor's Perspective of Benefits and  
28  
29 89 Rewards (PPBR) measure was designed by Dibert, et al. [23] to evaluate the  
30  
31 90 perceived benefits of clinical preceptor nurses, however, it is not relevant to general  
32  
33 91 clinical nurses. A questionnaire entitled Nurses' Perceived Professional Benefits  
34  
35 92 Questionnaire (NPPBQ) was developed to assess how Chinese nurses perceive the  
36  
37 93 gains and benefits of their employment [5, 24]. This questionnaire has been utilized in  
38  
39 94 a lot of research to date. While we now have a better grasp of nurses' perceptions of  
40  
41 95 professional benefits, but the heterogeneity of the population is still lack, screening  
42  
43 96 strategies for future precision interventions cannot be developed for identifying low-  
44  
45 97 benefit populations.

46 98 To our knowledge, it has not been shown that sufficient evidence exists to  
47  
48 99 answer the questions of whether nurses' perceived professional benefits differ in  
49  
50 100 groups and what factors contribute to these differences. The current study was created  
51  
52 101 to bridge that gap. This study's objective was to examine the characteristics and  
53  
54 102 determinants of nurses' perceived professional benefits as well as the predictors of  
55  
56 103 these latent profiles.

57  
58 104

## 59 105 **MATERIALS AND METHODS**

**106 Study design**

107 An online survey with convenient sampling was used in this study to conduct a cross-  
108 sectional analysis. This study was designed and reported in accordance with the  
109 guidelines for Strengthening the Reporting of Observational Studies in Epidemiology  
110 (STROBE)[25].

**112 Sample size estimation**

113 An examination of the latent profiles of perceived professional benefits among  
114 nurses was conducted in this study. LPA needs a sample size larger than 500 [26, 27],  
115 therefore, the minimum sample size for this study was 500.

**117 Participants**

118 Participants in this study required to meet the inclusion criteria and be registered  
119 nurses. To be considered, candidates had to satisfy the following criteria to be  
120 considered: (1) having worked as a nurse in a medical facility, and (2) being willing to  
121 participate in this study. The following were the exclusion criteria: logical errors or  
122 missing information in questionnaire answers.

**124 Measurements****125 Demographic**

126 This study gathered and evaluated demographic data including age, gender, greatest  
127 degree of education, marital status, and other participant characteristics.

**129 Nurses' Perceived Professional Benefits Questionnaire (NPPBQ)**

130 The questionnaire was designed by Jing Hu, et al. [5] to investigate the gains and  
131 benefits that nurses perceived from their jobs. The authors then reduced it to 17 items  
132 by 2020 [24]. The questionnaire has five dimensions: personal growth, a good nurse-  
133 patient relationship, recognition from family and friends, a positive occupational  
134 perception, and team belonging. Items are scored on a 5-point Likert scale (1 =  
135 strongly disagree, 2 = disagree, 3 = not sure, 4 = agree, 5 = strongly agree).

1  
2  
3  
4 136 Cronbach's alphas for the questionnaires were 0.94, and the NPPBQ  
5 137 subquestionnaires' alphas were 0.84, 0.83, 0.74, 0.79, and 0.85.

6  
7 138

8  
9 139 **Data collection**

10  
11 140 During the dates of July 6 and July 27, 2022, data was gathered. Wenjuanxing  
12 141 (www.wjx.cn) was used to develop a web-based questionnaire. Two researchers  
13 142 reviewed the online questionnaire for rigor and verified the feasibility of the  
14 143 questionnaire by completing it within the team. A poster was created to present the  
15 144 link and QR code. It was clearly shown on the poster who would be included and  
16 145 excluded from the survey. We distributed the questionnaire nationwide in China and  
17 146 did not limit the source and setting of nurses. The researcher contacted administrators  
18 147 or general nurses to disseminate the questionnaire. Wechat was used to send the  
19 148 poster and information letter. The survey can be completed by clicking on the link or  
20 149 scanning the QR code, completed questionnaires can be returned directly to the web.

21  
22 150

23  
24 151 **Statistical analyses**

25  
26 152 The use of latent profile analysis (LPA) is frequently used to determine the  
27 153 number of subpopulations in a given sample. LPA is a statistical method that use  
28 154 potential category variables to explain the link between exogenous continuous-type  
29 155 indicators, permitting the assessment of the correlation between exogenous indicators  
30 156 and the maintenance of local independence among exogenous indicators [27]. Latent  
31 157 profile analysis was conducted using Mplus 7.4 software. Log likelihood (LL),  
32 158 Akaike information criterion (AIC), Akaike Information Criterion (BIC), Adjusted  
33 159 Bayesian Information Criteria (aBIC), Entropy, Lo-Mendell-Rubin (LMR), and the  
34 160 Bootstrapped Likelihood Ratio Test (BLRT) were used to assess model fit and  
35 161 determine the appropriate number of categories. In order to decide which model best  
36 162 fit the data, the models from each category's fitting results were combined with the  
37 163 aforementioned indicators. The data was examined using the SPSS 26.0 statistical  
38 164 program. We utilized frequency and composition ratios for categorical data, whereas  
39 165 mean and standard deviation were utilized for continuous variables. The chi-square

1  
2  
3  
4 166 test was performed to compare category variables across groups. ANOVA was used  
5  
6 167 to compare continuous variables among multiple groups. A multivariate logistic  
7  
8 168 regression model was employed to analyze the variations in demographic variables. A  
9  
10 169 statistically significant difference was indicated by  $p < 0.05$ .

11  
12 170

### 14 171 **Ethical considerations**

15  
16 172 The Ethics Committee of the First People's Hospital of Zunyi (2022-016) approved  
17  
18 173 the study, and participants gave permission for data collection. Prior to completing the  
19  
20 174 survey, participants will be provided with information about the purpose of the study  
21  
22 175 and the major substance of the research. They will then be able to provide their  
23  
24 176 informed consent through a yes or no response. In addition, participants were also  
25  
26 177 informed that the study's findings would be given in aggregate form and that no  
27  
28 178 participant could be identified. If a person declined to complete the questionnaire, the  
29  
30 179 collection was immediately ended.

31  
32 180

### 33 181 **Patient and public involvement**

34  
35 182 Patients and/or the public were not involved in the design, or conduct, or reporting, or  
36  
37 183 dissemination plans of this research.

38  
39 184

## 41 185 **RESULTS**

### 43 186 **Participant characteristics**

44  
45 187 A total of 1409 nurses completed the questionnaire, while 58 nurses denied  
46  
47 188 participation, for a total number of 1351 questionnaires received. 42 surveys were  
48  
49 189 considered invalid due to insufficient or inaccurate information. 92.9 percent of the  
50  
51 190 final 1309 surveys were correctly returned. The ages of the participants varied from 18  
52  
53 191 to 59 years old, with a mean age of 32.25 (SD: 6.18) years old. The bulk of participants  
54  
55 192 were female (86.7%), whereas the minority were male (3.2%).

56  
57 193

### 59 194 **Characteristics of the different classes**

60



195 On the basis of the NPPBQ's five dimensions, it was established that a model with three  
 196 latent classes provided the greatest match. A class represents different categorisation  
 197 methods, such as a class 1 for a single subgroup, a class 2 for two heterogeneous  
 198 subgroups, and so forth. Table 1 provides the results. While the AIC and BIC in class  
 199 4 were lower in class 4 than in class 3, the entropy was greater; nonetheless, the lowest  
 200 category probability in class 4 was 1.4%, which is unsatisfactory. As a consequence,  
 201 we decided that the best-fitting model is class 3. Using a three-class model, Figure 1  
 202 illustrates the mean scores for each category within the NPPBQ's dimensions. The  
 203 percentages increase from class 1 to class 3 as follows: 11.8% (155 nurses), 57.1% (747  
 204 nurses), and 31.1% (407 nurses). For the sake of brevity, based on the profile scores,  
 205 we named class 1 as the low perceived professional benefits, class 2 as the moderate  
 206 perceived professional benefits, and class 3 as the high perceived professional benefits.

207 **Table 1** Potential profile analysis indicators ( $N=1309$ )

| Model   | LL <sup>a</sup> | AIC <sup>b</sup> | BIC <sup>c</sup> | aBIC <sup>d</sup> | Entrop<br>y | LMR <sup>e</sup><br>p-value | BLRT <sup>f</sup><br>p-value | Category probability    |
|---------|-----------------|------------------|------------------|-------------------|-------------|-----------------------------|------------------------------|-------------------------|
| Class 1 | -<br>14709.353  | 29438.706        | 29490.476        | 29458.711         | -           | -                           | -                            | -                       |
| Class 2 | -<br>13420.425  | 26872.850        | 26955.682        | 26904.857         | 0.905       | <<br>0.001                  | < 0.001                      | 0.654/0.346             |
| Class 3 | -<br>12583.629  | 25211.257        | 25325.152        | 25255.268         | 0.936       | 0.007                       | < 0.001                      | 0.118/0.571/0.311       |
| Class 4 | -<br>12307.807  | 24671.613        | 24816.570        | 24727.627         | 0.940       | 0.036                       | < 0.001                      | 0.151/0.014/0.530/0.306 |

208

209 a Log likelihood, b Akaike information criterion, c Bayesian information criterion, d Adjusted  
 210 bayesian information criterion, e Lo-Mendell-Rubin Likelihood Ratio Test, f Bootstrapped  
 211 Likelihood Ratio Test

212

### 213 **The scale and dimension scores of different profiles**

214 The findings of a one-way ANOVA indicated statistically significant differences in the  
 215 scale and dimension scores of different profiles (both  $p < 0.001$ ). The results were shown  
 216 in Figure 2 demonstrates the outcomes.

217

218 **Demographic and related characteristics of each profile**

219 The ANOVA and chi-square tests indicated statistically significant differences  
 220 between the three profiles differed statistically in terms of age, marital status, children,  
 221 professional title, leadership role, working years, and number of night shifts per month.  
 222 Table 2 is a summary of the results.

223 **Table 2** Demographic and characteristics by latent profile ( $N=1309$ )

| Variables                | Class 1      | Class 2         | Class 3      | $\chi^2/F$ | $p$     |
|--------------------------|--------------|-----------------|--------------|------------|---------|
| Age (SD)                 | 30.94 (5.37) | 31.76<br>(5.91) | 33.64 (6.71) | 16.545     | < 0.001 |
| Gender                   |              |                 |              | 0.600      | 0.741   |
| Male                     | 6 (3.9)      | 25 (3.3)        | 11 (2.7)     |            |         |
| Female                   | 149 (96.1)   | 722 (96.7)      | 396 (97.3)   |            |         |
| Highest Degree           |              |                 |              | 1.602      | 0.449   |
| Junior college and below | 29 (18.7)    | 111 (14.9)      | 60 (14.7)    |            |         |
| Bachelor's and above     | 126 (81.3)   | 636 (85.1)      | 347 (85.3)   |            |         |
| Marital status           |              |                 |              | 25.768     | < 0.001 |
| Single/divorced/widowed  | 62 (40.0)    | 218 (29.2)      | 80 (19.7)    |            |         |
| Married                  | 93 (60.0)    | 529 (70.8)      | 327 (80.3)   |            |         |
| Children                 |              |                 |              | 26.943     | < 0.001 |
| Yes                      | 87 (56.1)    | 481 (64.4)      | 311 (76.4)   |            |         |
| No                       | 68 (43.9)    | 266 (35.6)      | 96 (23.6)    |            |         |
| Professional title       |              |                 |              | 23.589     | < 0.001 |
| Junior Level             | 102 (65.8)   | 448 (60.0)      | 207 (50.9)   |            |         |
| Intermediate level       | 50 (32.3)    | 280 (37.5)      | 172 (42.3)   |            |         |
| Senior level             | 3 (1.9)      | 19 (2.5)        | 28 (6.9)     |            |         |
| Leadership role          |              |                 |              | 17.086     | < 0.001 |
| Yes                      | 18 (11.6)    | 86 (11.5)       | 82 (20.1)    |            |         |

|                                  |            |            |            |        |         |
|----------------------------------|------------|------------|------------|--------|---------|
| No                               | 137 (88.4) | 661 (88.5) | 325 (79.9) |        |         |
| Working years (years)            |            |            |            | 32.903 | < 0.001 |
| ≤5                               | 52 (33.5)  | 217 (29.0) | 79 (19.4)  |        |         |
| 6–15                             | 91 (58.7)  | 438 (58.6) | 241 (59.2) |        |         |
| ≥16                              | 12 (7.7)   | 92 (12.3)  | 87 (21.4)  |        |         |
| Average monthly income (yuan)*   |            |            |            | 7.990  | 0.239   |
| ≤3000                            | 23 (14.8)  | 75 (10.0)  | 43 (10.6)  |        |         |
| 3001~6000                        | 93 (60.0)  | 415 (55.6) | 217 (53.3) |        |         |
| 6001~9000                        | 27 (17.4)  | 179 (24.0) | 105 (25.8) |        |         |
| ≥9001                            | 12 (7.7)   | 78 (10.4)  | 42 (10.3)  |        |         |
| Number of night shifts per month |            |            |            | 17.797 | 0.001   |
| 0                                | 42 (27.1)  | 233 (31.2) | 164 (40.3) |        |         |
| 1–4                              | 22 (14.2)  | 143 (19.1) | 73 (17.9)  |        |         |
| ≥5                               | 91 (58.7)  | 371 (49.7) | 170 (41.8) |        |         |

224

225 \* 1 USD equals 7.31 Chinese Yuan, exchange rate on September 29, 2023

226

227 A multivariate logistic regression model was constructed using the variables with  
 228 statistically significant differences as determined by ANOVA and chi-square tests. Of  
 229 the three profiles, the class 3 was chosen as a reference to find the predictors linked  
 230 with NPPBQ. As shown in Table 3, nurses who were single/divorced/widowed were  
 231 more likely to belonged to low perceived professional benefits (*OR*: 1.984,  
 232 95%*CI*:1.028-3.828). The number of night shifts worked per month was associated with  
 233 low perceived professional benefits (*OR*: 0.633, 95% *CI*: 0.405-0.988), compared to  
 234 those with more than five night shifts, those without night shifts tended to fall into the  
 235 high perceived professional benefits. Nurses without a leadership role were more likely  
 236 to be in the moderate perceived professional benefits (*OR*: 1.489, 95% *CI*: 1.028-2.157).

237 Other variables were not statistically significant in the multivariate logistic regression.

238

239

240

241

242

**Table 3** Predictors of latent profile membership

| Variables                        | Class 1 VS Class 3 |        |             | Class 2 VS Class 3 |        |             |
|----------------------------------|--------------------|--------|-------------|--------------------|--------|-------------|
|                                  | $\beta$            | OR     | 95%CI       | $\beta$            | OR     | 95%CI       |
| Age (SD)                         | 0.004              | 1.004  | 0.941-1.070 | -0.005             | 0.995  | 0.957-1.034 |
| Marital status                   |                    |        |             |                    |        |             |
| Single/divorced/widowed          | 0.685              | 1.984* | 1.028-3.828 | 0.115              | 1.122  | 0.716-1.760 |
| Married (Ref)                    |                    |        |             |                    |        |             |
| Children                         |                    |        |             |                    |        |             |
| No                               | 0.177              | 1.194  | 0.622-2.293 | 0.240              | 1.272  | 0.822-1.967 |
| Yes (Ref)                        |                    |        |             |                    |        |             |
| Professional title               |                    |        |             |                    |        |             |
| Junior level                     | 0.368              | 1.444  | 0.334-6.241 | 0.359              | 1.433  | 0.661-3.105 |
| Intermediate level               | 0.378              | 1.460  | 0.370-5.766 | 0.429              | 1.535  | 0.764-3.085 |
| Senior level (Ref)               |                    |        |             |                    |        |             |
| Leadership role                  |                    |        |             |                    |        |             |
| No                               | 0.139              | 1.984  | 1.028-3.828 | 0.398              | 1.489* | 1.028-2.157 |
| Yes (Ref)                        |                    |        |             |                    |        |             |
| Working years (years)            |                    |        |             |                    |        |             |
| $\leq 5$                         | 0.781              | 2.184  | 0.666-7.161 | 0.411              | 1.508  | 0.748-3.042 |
| 6–15                             | 0.721              | 2.057  | 0.847-5.000 | 0.228              | 1.256  | 0.773-2.039 |
| $\geq 16$ (Ref)                  |                    |        |             |                    |        |             |
| Number of night shifts per month |                    |        |             |                    |        |             |
| 0                                | -0.458             | 0.633* | 0.405-0.988 | -0.223             | 0.800  | 0.601-1.064 |
| 1–4                              | -0.354             | 0.702  | 0.400-1.231 | 0.089              | 1.094  | 0.768-1.558 |

1  
2  
3  
4  $\geq 5$  (Ref)  
5

---

6 243 \* $p < 0.05$ ; *OR*, Odds ratio; 95% *CI*, 95% Confidence Interval; Ref, Reference.  
7  
8  
9  
10  
11  
12  
13  
14  
15  
16  
17  
18  
19  
20  
21  
22  
23  
24  
25  
26  
27  
28  
29  
30  
31  
32  
33  
34  
35  
36  
37  
38  
39  
40  
41  
42  
43  
44  
45  
46  
47  
48  
49  
50  
51  
52  
53  
54  
55  
56  
57  
58  
59  
60

For peer review only

## 244 **DISCUSSION**

245 The purpose of this research was to identify distinct profiles of nurses' perceived  
246 professional benefits. Furthermore, the current study employed multinomial logistic  
247 regression to investigate predictors of these profiles.

248 In this study, we investigated 1309 nurses who validly completed the questionnaire.  
249 As a result, three latent profiles were identified: low perceived professional benefits,  
250 moderate perceived professional benefits, and high perceived professional benefits. Our  
251 research revealed that the majority of nurses had a moderate or higher levels of  
252 perceived professional benefits, with just 11.8% of nurses belonging to the category of  
253 nurses with low perceived professional benefits. Most studies reported nurses had an  
254 upper-moderate level of perceived professional benefits [28, 29], and our findings are  
255 consistent with those of previous studies. Most importantly, our study clarified the  
256 heterogeneous subgroups of nurses' perceived professional benefits and their specific  
257 distribution.

258 In the last three years, nurses have been a key part of the fight against the COVID-  
259 19 outbreak. Despite heavy job pressure, nurses have had a feeling of professional  
260 calling and value [30], which has effectively enhanced their sense of professional  
261 benefit [1]. At the same time, the critical role of nurses in defending people's lives and  
262 health has earned the society's respect and recognition, as well as a positive social image  
263 [31, 32], which can further enhance nurses' sense of professional benefit. Our survey  
264 was conducted during the COVID-19 epidemic, and nurses' perceptions of professional  
265 benefit may be elevated.

266 Another finding of our study revealed that the membership of profiles can be  
267 predicted by some characteristics such as the number of night shifts, leadership role,  
268 and marriage status. Nursing is a continuous, 24-hour profession, and nurse's work  
269 normally takes the form of night shifts. It is widely proven that night shifts negatively  
270 impact the physical and emotional health of nurses [33-36]. Nurses working rotating  
271 night shifts were normally younger, and they had the lower scores of job satisfaction,  
272 quality of sleep, and quantity of sleep [37], these factors resulted in a low perceived  
273 professional benefits. Consistent with past research, our findings indicate that the

1  
2  
3  
4 274 greater the frequency of night shifts, the lower the perceived professional benefit [29].

5 275 According to our results, 57.1% of nurses perceived professional benefits as  
6  
7 276 moderate. The majority of nurses in the moderate perceived professional benefits  
8  
9 277 group lacked a work title, while the majority of nurses in the highly perceived  
10  
11 278 professional benefits group held a leadership role. This has been validated by other  
12  
13 279 research, and our work provides more support for this notion [29]. Holding a  
14  
15 280 managerial position at a hospital is a means of advancing one's career, and nurses  
16  
17 281 highly value this opportunity.

18  
19 282 Our study found that nurses who were single/divorced/widowed were more likely  
20  
21 283 to belong to low perceived professional benefits, which is consistent with earlier  
22  
23 284 findings [29]. This may be because, unlike single/divorced/widowed nurses, married  
24  
25 285 nurses receive more social support from their spouses and other family members.

26  
27 286 We hypothesized that job fulfillment and social support are important influencing  
28  
29 287 mechanisms that affect nurses' perceived professional benefits. The number of night  
30  
31 288 shifts, leadership roles are important indicators of nurses' job fulfillment. Marital status  
32  
33 289 is an important factor in social support. Each of these factors can have varying degrees  
34  
35 290 of impact on the actual benefit or spiritual benefit [4]. Considering that nurses perceive  
36  
37 291 professional benefits as a result of personal, organizational, environmental, and social  
38  
39 292 factors, a well-developed theoretical framework is required to explain this phenomenon.

40  
41 293 Unfortunately, our research failed to demonstrate that the profiles can be predicted  
42  
43 294 by other factors in the model variables. Our findings in the univariate analysis results  
44  
45 295 were consistent with earlier research. Nevertheless, because the bulk of prior research  
46  
47 296 did not employ multi-factor models, it was impossible to compare our findings could  
48  
49 297 not be compared to those of others. In addition, certain putative contributing elements  
50  
51 298 were not adequately proven, and further research is required to confirm them in the  
52  
53 299 future.

54 300 Our research has theoretical and practical implications for the future study of  
55  
56 301 nurses' perceived professional benefits. First, the number of night shifts, leadership  
57  
58 302 role, and marriage status are the most significant factors affecting nurses' perceived  
59  
60 303 professional benefits, and in the future, we should focus on the degree of influence of

1  
2  
3  
4 304 these three factors and explore the mechanisms from the theoretical level. Second,  
5 305 managers should pay active attention to the perceived professional benefits of clinical  
6  
7 306 nurses, create a favorable working environment and professional growth atmosphere,  
8  
9 307 and promote the professional success of nurses. Given that 11.8% of nurses still have  
10  
11 308 a low perceived sense of career benefit, more tailored intervention programs are still  
12  
13 309 needed in the future.

14  
15 310

### 16 17 311 **Strengths and limitations**

18  
19 312 To the best of our knowledge, this is the first study to use the LPA approach to explore  
20  
21 313 heterogeneous subgroups of nurses' perceived professional benefit with a large sample  
22  
23 314 size, and we presented a unique perspective and a basis for future research on the  
24  
25 315 perceived career benefits of nurses. The research was limited in some ways. First, this  
26  
27 316 was a web-based survey, and the sample process and self-reporting strategy may have  
28  
29 317 resulted in some bias. Second, we only polled nurses in mainland China, and our sample  
30  
31 318 only reflected the current situation in a single nation. Lastly, the constraints of the  
32  
33 319 study's design prohibited an in-depth assessment of the psychological factors behind  
34  
35 320 nurses' perceptions of their professional benefit. As a result, more rigorously designed  
36  
37 321 studies will be required in the future to investigate this issue in depth.

38  
39 322

### 40 41 323 **CONCLUSION**

42  
43 324 Our study identified three professional benefits profiles among nurses. The results of  
44  
45 325 our study indicated that nurses enjoy a high level of professional benefits.

46  
47 326 Notwithstanding the study's limitations of the study and the present condition of  
48  
49 327 nursing, it is vital that we engage on several levels to encourage a stable nursing  
50  
51 328 workforce, including policy, organisation, financial income, and career development,  
52  
53 329 so that nurses experience a sense of professional gain.

54 330  
55  
56  
57  
58  
59  
60



1  
2  
3  
4 331 **Acknowledgements**

5 332 None.

6  
7 333 **AUTHOR CONTRIBUTIONS**

8  
9 334 Jiang Hu and Sun Changli were responsible for the conception and study design. Yao

10 335 Qiangfang, Wang Xianwei and Liu Hanmei performed the data collection. Yao

11 336 Qiangfang, Wang Xianwei and Wen Xueke contributed to the analysis of the data.

12 337 Sun Changli and Jiang Hu were involved in drafting the manuscript and revising it.

13 338 All authors have read and approved the final manuscript.

14 339 **FUNDING**

15 340 This study was funded by the the Science and Technology Joint Funds of Zunyi

16 341 Science and Technology Bureau (2023-73).

17 342 **CONFLICT OF INTEREST**

18 343 The authors have no conflicts of interest to declare.

19 344 **Ethics approval**

20 345 This study involves human participants and was approved by the Ethics Committee of  
21 346 the First People's Hospital of Zunyi (2022-016). Participants gave informed consent to  
22 347 participate in the study before taking part.

23 348 **Data availability statement**

24 349 Data are available upon reasonable request. Data are available from the corresponding  
25 350 author and the first author on reasonable request.

26 351

27  
28  
29  
30  
31  
32  
33  
34  
35  
36  
37  
38  
39  
40  
41  
42  
43  
44  
45  
46  
47  
48  
49  
50  
51  
52  
53  
54  
55  
56  
57  
58  
59  
60

352 **REFERENCES**

- 353 1. Wang X, Chen F, Dai P, Lin X, Qi L: **Perceived professional benefits and associated**  
354 **factors among nurses during the COVID-19 pandemic: A cross-sectional study.** *Nurs*  
355 *Open* 2023, **10**(3):1461-1470.
- 356 2. Jiang H, Huang N, Tian W, Shi S, Yang G, Pu H: **Factors Associated With Post-**  
357 **traumatic Stress Disorder Among Nurses During COVID-19.** *Front Psychol* 2022,  
358 **13**:745158.
- 359 3. Liu S, Duan X, Han P, Shao H, Jiang J, Zeng L: **Occupational benefit perception of**  
360 **acute and critical care nurses: A qualitative meta-synthesis.** *Front Public Health* 2022,  
361 **10**:976146.
- 362 4. Zhou H, Zhu Y, Zhang X, Peng J, Li Q, Wang X, Wang L, Cai X, Lan L: **Psychological**  
363 **Capital and Perceived Professional Benefits: Testing the Mediating Role of Perceived**  
364 **Nursing Work Environment Among Chinese Nurses.** *J Psychosoc Nurs Ment Health*  
365 *Serv* 2018, **56**(4):38-47.
- 366 5. Hu J, Liu X: **The preparation of nurses' occupational benefit questionnaire and its**  
367 **reliability and validity test [J].** *J Chin People's Liberation Army* 2013, **30**(22):1-5.
- 368 6. Malone B: **A Perspective on the State of the World's Nursing Report.** *Nurs Adm Q* 2021,  
369 **45**(1):6-12.
- 370 7. Ivziku D, de Maria M, Ferramosca FMP, Greco A, Tartaglini D, Gualandi R: **What**  
371 **determines physical, mental and emotional workloads on nurses? A cross-sectional**  
372 **study.** *J Nurs Manag* 2022, **30**(8):4387-4397.
- 373 8. Morgan B, Jordan L, Rivera LA: **Considerations for an aging nurse anesthetists**  
374 **workforce.** *Geriatr Nurs* 2020, **41**(6):1017-1019.

- 1  
2  
3  
4 375 9. Tamata AT, Mohammadnezhad M: **A systematic review study on the factors affecting**  
5  
6 376 **shortage of nursing workforce in the hospitals.** *Nurs Open* 2023, **10**(3):1247-1257.  
7  
8  
9 377 10. van der Cingel M, Brouwer J: **What makes a nurse today? A debate on the nursing**  
10  
11 378 **professional identity and its need for change.** *Nurs Philos* 2021, **22**(2):e12343.  
12  
13  
14 379 11. Udod S: **A Call for Urgent Action: Innovations for Nurse Retention in Addressing the**  
15  
16 380 **Nursing Shortage.** *Nurs Rep* 2023, **13**(1):145-147.  
17  
18  
19 381 12. **China Statistical Yearbook** [<http://www.stats.gov.cn/sj/nds/2022/indexch.htm>]  
20  
21  
22 382 13. Zeng LN, Zhang JW, Zong QQ, Chan SW, Browne G, Ungvari GS, Chen LG, Xiang  
23  
24 383 **YT: Prevalence of burnout in mental health nurses in China: A meta-analysis of**  
25  
26 384 **observational studies.** *Arch Psychiatr Nurs* 2020, **34**(3):141-148.  
27  
28  
29 385 14. Chen JP, Dai YM, Qin Y, Liang SP, Cheng G, Liu Y, Yang CZ, He HG, Shen Q: **Factors**  
30  
31 386 **influencing turnover intention among male nurses in China: A large-scale descriptive**  
32  
33 387 **correlational study.** *Int Nurs Rev* 2023.  
34  
35  
36 388 15. Yu JF, Ding YM, Jia RY, Liang DD, Wu Z, Lu GL, Chen CR: **Professional identity and**  
37  
38 389 **emotional labour affect the relationship between perceived organisational justice and**  
39  
40 390 **job performance among Chinese hospital nurses.** *J Nurs Manag* 2022, **30**(5):1252-  
41  
42 391 1262.  
43  
44  
45 392 16. Lin L, Liu X, He G: **Mindfulness and Job Satisfaction Among Hospital Nurses: The**  
46  
47 393 **Mediating Roles of Positive Affect and Resilience.** *J Psychosoc Nurs Ment Health Serv*  
48  
49 394 2020, **58**(6):46-55.  
50  
51  
52 395 17. Macey A, Green C, Jarden RJ: **ICU nurse preceptors' perceptions of benefits, rewards,**  
53  
54 396 **supports and commitment to the preceptor role: A mixed-methods study.** *Nurse Educ*  
55  
56  
57  
58  
59  
60

- 1  
2  
3  
4 397 *Pract* 2021, **51**:102995.
- 5  
6 398 18. Natan MB, Qeadan H, Egbaria W: **The commitment of Israeli nursing preceptors to the**  
7  
8  
9 399 **role of preceptor.** *Nurse Educ Today* 2014, **34**(12):1425-1429.
- 10  
11 400 19. Zheng RS, Guo QH, Dong FQ, Owens RG: **Chinese oncology nurses' experience on**  
12  
13  
14 401 **caring for dying patients who are on their final days: a qualitative study.** *Int J Nurs Stud*  
15  
16  
17 402 2015, **52**(1):288-296.
- 18  
19 403 20. Christiansen A, Vernon V, Jinks A: **Perceptions of the benefits and challenges of the**  
20  
21  
22 404 **role of advanced practice nurses in nurse-led out-of-hours care in Hong Kong: a**  
23  
24  
25 405 **questionnaire study.** *J Clin Nurs* 2013, **22**(7-8):1173-1181.
- 26  
27 406 21. Wu B, Zhao Y, Xu D, Wang Y, Niu N, Zhang M, Zhi X, Zhu P, Meng A: **Factors**  
28  
29  
30 407 **associated with nurses' willingness to participate in care of patients with COVID-19: A**  
31  
32  
33 408 **survey in China.** *J Nurs Manag* 2020, **28**(7):1704-1712.
- 34  
35 409 22. Liu X, Ju X, Liu X: **The relationship between resilience and intent to stay among**  
36  
37  
38 410 **Chinese nurses to support Wuhan in managing COVID-19: The serial mediation effect**  
39  
40  
41 411 **of post-traumatic growth and perceived professional benefits.** *Nurs Open* 2021,  
42  
43 412 **8**(5):2866-2876.
- 44  
45 413 23. Dibert C, Goldenberg D: **Preceptors' perceptions of benefits, rewards, supports and**  
46  
47  
48 414 **commitment to the preceptor role.** *J Adv Nurs* 1995, **21**(6):1144-1151.
- 49  
50 415 24. Hu Y, Hu J, Li L, Zhao B, Liu X, Li F: **Development and preliminary validation of a brief**  
51  
52  
53 416 **nurses' perceived professional benefit questionnaire (NPPBQ).** *BMC Med Res*  
54  
55  
56 417 *Methodol* 2020, **20**(1):18.
- 57  
58 418 25. von Elm E, Altman DG, Egger M, Pocock SJ, Gøtzsche PC, Vandenbroucke JP: **The**  
59  
60

- 1  
2  
3  
4 419 **Strengthening the Reporting of Observational Studies in Epidemiology (STROBE)**  
5  
6 420 **Statement: guidelines for reporting observational studies.** *Int J Surg* 2014, **12**(12):1495-  
7  
8  
9 421 1499.
- 10  
11 422 26. Nylund KL, Asparouhov T, Muthén BO: **Deciding on the number of classes in latent**  
12  
13  
14 423 **class analysis and growth mixture modeling: A Monte Carlo simulation study.** *Structural*  
15  
16  
17 424 *equation modeling: A multidisciplinary Journal* 2007, **14**(4):535-569.
- 18  
19 425 27. Spurk D, Hirschi A, Wang M, Valero D, Kauffeld S: **Latent profile analysis: A review**  
20  
21  
22 426 **and "how to" guide of its application within vocational behavior research.** *Journal of*  
23  
24  
25 427 *vocational behavior* 2020, **120**:103445.
- 26  
27 428 28. Ma HW, Dan X, Xu SH, Hou RN, Zhao NM: **[Current status of nurses' perceived**  
28  
29  
30 429 **professional benefits and influencing factors in 3A-level hospitals in Tianjin].** *Zhonghua*  
31  
32  
33 430 *Lao Dong Wei Sheng Zhi Ye Bing Za Zhi* 2017, **35**(6):443-447.
- 34  
35 431 29. Zhan T, Li H, Ding X: **Can social support enhance sense of coherence and perceived**  
36  
37  
38 432 **professional benefits among Chinese registered nurses? A mediation model.** *J Nurs*  
39  
40  
41 433 *Manag* 2020, **28**(3):488-494.
- 42  
43 434 30. Savitsky B, Radomislensky I, Hendel T: **Nurses' occupational satisfaction during Covid-**  
44  
45  
46 435 **19 pandemic.** *Appl Nurs Res* 2021, **59**:151416.
- 47  
48 436 31. Mohammed S, Peter E, Killackey T, Maciver J: **The "nurse as hero" discourse in the**  
49  
50  
51 437 **COVID-19 pandemic: A poststructural discourse analysis.** *Int J Nurs Stud* 2021,  
52  
53  
54 438 **117**:103887.
- 55  
56 439 32. Begnini D, Cicoiella DA, Freitas KR, Maranhão T, Rocha CMF, Kruse MHL: **Heroines**  
57  
58  
59 440 **in Covid-19 times: visibility of nursing in the pandemic.** *Rev Gaucha Enferm* 2021,  
60

- 1  
2  
3  
4 441 42(spe):e20200373.  
5  
6 442 33. James L, Elkins-Brown N, Wilson M, James SM, Dotson E, Edwards CD, Wintersteen-  
7  
8  
9 443 Arleth L, Stevens K, Butterfield P: **The effects of three consecutive 12-hour shifts on**  
10  
11 444 **cognition, sleepiness, and domains of nursing performance in day and night shift**  
12  
13 445 **nurses: A quasi-experimental study.** *Int J Nurs Stud* 2021, **123**:104041.  
14  
15  
16 446 34. Weaver SH, de Cordova PB, Vitale TR, Hargwood P, Salmond S: **Experiences and**  
17  
18 447 **perceptions of nurses working night shift: a qualitative systematic review.** *JBI Evid*  
19  
20 448 *Synth* 2023, **21**(1):33-97.  
21  
22  
23 449 35. Borroni E, Frigerio G, Polledri E, Mercadante R, Maggioni C, Fedrizzi L, Pesatori AC,  
24  
25 450 Fustinoni S, Carugno M: **Metabolomic profiles in night shift workers: A cross-sectional**  
26  
27 451 **study on hospital female nurses.** *Front Public Health* 2023, **11**:1082074.  
28  
29  
30 452 36. Jørgensen JT, Rozing MP, Westendorp RGJ, Hansen J, Stayner LT, Simonsen MK,  
31  
32 453 Andersen ZJ: **Shift work and incidence of psychiatric disorders: The Danish Nurse**  
33  
34 454 **Cohort study.** *J Psychiatr Res* 2021, **139**:132-138.  
35  
36  
37 455 37. Ferri P, Guadi M, Marcheselli L, Balduzzi S, Magnani D, Di Lorenzo R: **The impact of**  
38  
39 456 **shift work on the psychological and physical health of nurses in a general hospital: a**  
40  
41 457 **comparison between rotating night shifts and day shifts.** *Risk Manag Healthc Policy*  
42  
43 458 2016, **9**:203-211.  
44  
45  
46  
47  
48  
49  
50  
51  
52  
53  
54  
55  
56  
57  
58  
59  
60

1  
2  
3  
4 461 **Figure 1** Latent profiles of NPPBQ

5  
6 462

7 463 **Figure 2** The scale and dimension scores of different profiles

8  
9 464

10  
11 465

12  
13  
14  
15  
16  
17  
18  
19  
20  
21  
22  
23  
24  
25  
26  
27  
28  
29  
30  
31  
32  
33  
34  
35  
36  
37  
38  
39  
40  
41  
42  
43  
44  
45  
46  
47  
48  
49  
50  
51  
52  
53  
54  
55  
56  
57  
58  
59  
60

For peer review only

1  
2  
3  
4  
5  
6  
7  
8  
9  
10  
11  
12  
13  
14  
15  
16  
17  
18  
19  
20  
21  
22  
23  
24  
25  
26  
27  
28  
29  
30  
31  
32  
33  
34  
35  
36  
37  
38  
39  
40  
41  
42  
43  
44  
45  
46  
47  
48  
49  
50  
51  
52  
53  
54  
55  
56  
57  
58  
59  
60



Latent profiles of NPPBQ  
145x76mm (300 x 300 DPI)





The scale and dimension scores of different profiles

145x114mm (300 x 300 DPI)

STROBE Statement—Checklist of items that should be included in reports of *cross-sectional studies*

|                              | Item No | Recommendation                                                                                                                                                                                               | Page No |
|------------------------------|---------|--------------------------------------------------------------------------------------------------------------------------------------------------------------------------------------------------------------|---------|
| <b>Title and abstract</b>    | 1       | (a) Indicate the study's design with a commonly used term in the title or the abstract                                                                                                                       | 2       |
|                              |         | (b) Provide in the abstract an informative and balanced summary of what was done and what was found                                                                                                          | 2       |
| <b>Introduction</b>          |         |                                                                                                                                                                                                              |         |
| Background/rationale         | 2       | Explain the scientific background and rationale for the investigation being reported                                                                                                                         | 3-4     |
| Objectives                   | 3       | State specific objectives, including any prespecified hypotheses                                                                                                                                             | 4-5     |
| <b>Methods</b>               |         |                                                                                                                                                                                                              |         |
| Study design                 | 4       | Present key elements of study design early in the paper                                                                                                                                                      | 5       |
| Setting                      | 5       | Describe the setting, locations, and relevant dates, including periods of recruitment, exposure, follow-up, and data collection                                                                              | 5       |
| Participants                 | 6       | (a) Give the eligibility criteria, and the sources and methods of selection of participants                                                                                                                  | 5       |
| Variables                    | 7       | Clearly define all outcomes, exposures, predictors, potential confounders, and effect modifiers. Give diagnostic criteria, if applicable                                                                     | 5-6     |
| Data sources/<br>measurement | 8*      | For each variable of interest, give sources of data and details of methods of assessment (measurement). Describe comparability of assessment methods if there is more than one group                         | 5-6     |
| Bias                         | 9       | Describe any efforts to address potential sources of bias                                                                                                                                                    | 6       |
| Study size                   | 10      | Explain how the study size was arrived at                                                                                                                                                                    | 5       |
| Quantitative variables       | 11      | Explain how quantitative variables were handled in the analyses. If applicable, describe which groupings were chosen and why                                                                                 | 5-6     |
| Statistical methods          | 12      | (a) Describe all statistical methods, including those used to control for confounding                                                                                                                        | 6       |
|                              |         | (b) Describe any methods used to examine subgroups and interactions                                                                                                                                          | NA      |
|                              |         | (c) Explain how missing data were addressed                                                                                                                                                                  | NA      |
|                              |         | (d) If applicable, describe analytical methods taking account of sampling strategy                                                                                                                           | NA      |
|                              |         | (e) Describe any sensitivity analyses                                                                                                                                                                        | NA      |
| <b>Results</b>               |         |                                                                                                                                                                                                              |         |
| Participants                 | 13*     | (a) Report numbers of individuals at each stage of study—eg numbers potentially eligible, examined for eligibility, confirmed eligible, included in the study, completing follow-up, and analysed            | 7       |
|                              |         | (b) Give reasons for non-participation at each stage                                                                                                                                                         | 7       |
|                              |         | (c) Consider use of a flow diagram                                                                                                                                                                           | NA      |
| Descriptive data             | 14*     | (a) Give characteristics of study participants (eg demographic, clinical, social) and information on exposures and potential confounders                                                                     | 7       |
|                              |         | (b) Indicate number of participants with missing data for each variable of interest                                                                                                                          | NA      |
| Outcome data                 | 15*     | Report numbers of outcome events or summary measures                                                                                                                                                         | 8       |
| Main results                 | 16      | (a) Give unadjusted estimates and, if applicable, confounder-adjusted estimates and their precision (eg, 95% confidence interval). Make clear which confounders were adjusted for and why they were included | NA      |

|                          |    |                                                                                                                                                                            |      |
|--------------------------|----|----------------------------------------------------------------------------------------------------------------------------------------------------------------------------|------|
|                          |    | (b) Report category boundaries when continuous variables were categorized                                                                                                  | 8    |
|                          |    | (c) If relevant, consider translating estimates of relative risk into absolute risk for a meaningful time period                                                           | NA   |
| Other analyses           | 17 | Report other analyses done—eg analyses of subgroups and interactions, and sensitivity analyses                                                                             | NA   |
| <b>Discussion</b>        |    |                                                                                                                                                                            |      |
| Key results              | 18 | Summarise key results with reference to study objectives                                                                                                                   | 9-11 |
| Limitations              | 19 | Discuss limitations of the study, taking into account sources of potential bias or imprecision. Discuss both direction and magnitude of any potential bias                 | 11   |
| Interpretation           | 20 | Give a cautious overall interpretation of results considering objectives, limitations, multiplicity of analyses, results from similar studies, and other relevant evidence | 11   |
| Generalisability         | 21 | Discuss the generalisability (external validity) of the study results                                                                                                      | 11   |
| <b>Other information</b> |    |                                                                                                                                                                            |      |
| Funding                  | 22 | Give the source of funding and the role of the funders for the present study and, if applicable, for the original study on which the present article is based              | 12   |

\*Give information separately for exposed and unexposed groups.

**Note:** An Explanation and Elaboration article discusses each checklist item and gives methodological background and published examples of transparent reporting. The STROBE checklist is best used in conjunction with this article (freely available on the Web sites of PLoS Medicine at <http://www.plosmedicine.org/>, Annals of Internal Medicine at <http://www.annals.org/>, and Epidemiology at <http://www.epidem.com/>). Information on the STROBE Initiative is available at [www.strobe-statement.org](http://www.strobe-statement.org).

# BMJ Open

## Latent profile analysis of nurses' perceived professional benefits in China: a cross-sectional study

|                                 |                                                                                                                                                                                                                                                                                                                                                                                                               |
|---------------------------------|---------------------------------------------------------------------------------------------------------------------------------------------------------------------------------------------------------------------------------------------------------------------------------------------------------------------------------------------------------------------------------------------------------------|
| Journal:                        | <i>BMJ Open</i>                                                                                                                                                                                                                                                                                                                                                                                               |
| Manuscript ID                   | bmjopen-2023-078051.R2                                                                                                                                                                                                                                                                                                                                                                                        |
| Article Type:                   | Original research                                                                                                                                                                                                                                                                                                                                                                                             |
| Date Submitted by the Author:   | 12-Oct-2023                                                                                                                                                                                                                                                                                                                                                                                                   |
| Complete List of Authors:       | Sun, Changli; Third Affiliated Hospital of Zunyi Medical University<br>Jiang, Hu; Third Affiliated Hospital of Zunyi Medical University<br>Yao, Qingfang; The Third Affiliated Hospital of Zunyi Medical University<br>Wang, Xianwei; The Third Affiliated Hospital of Zunyi Medical University<br>Wen, Xueke; Third Affiliated Hospital of Zunyi Medical University<br>Liu, Hanmei; Zunyi Medical University |
| <b>Primary Subject Heading</b>: | Occupational and environmental medicine                                                                                                                                                                                                                                                                                                                                                                       |
| Secondary Subject Heading:      | Nursing, Occupational and environmental medicine                                                                                                                                                                                                                                                                                                                                                              |
| Keywords:                       | Burnout, Professional, Burnout, China                                                                                                                                                                                                                                                                                                                                                                         |
|                                 |                                                                                                                                                                                                                                                                                                                                                                                                               |

SCHOLARONE™  
Manuscripts

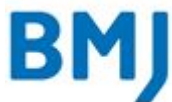

I, the Submitting Author has the right to grant and does grant on behalf of all authors of the Work (as defined in the below author licence), an exclusive licence and/or a non-exclusive licence for contributions from authors who are: i) UK Crown employees; ii) where BMJ has agreed a CC-BY licence shall apply, and/or iii) in accordance with the terms applicable for US Federal Government officers or employees acting as part of their official duties; on a worldwide, perpetual, irrevocable, royalty-free basis to BMJ Publishing Group Ltd ("BMJ") its licensees and where the relevant Journal is co-owned by BMJ to the co-owners of the Journal, to publish the Work in this journal and any other BMJ products and to exploit all rights, as set out in our [licence](#).

The Submitting Author accepts and understands that any supply made under these terms is made by BMJ to the Submitting Author unless you are acting as an employee on behalf of your employer or a postgraduate student of an affiliated institution which is paying any applicable article publishing charge ("APC") for Open Access articles. Where the Submitting Author wishes to make the Work available on an Open Access basis (and intends to pay the relevant APC), the terms of reuse of such Open Access shall be governed by a Creative Commons licence – details of these licences and which [Creative Commons](#) licence will apply to this Work are set out in our licence referred to above.

Other than as permitted in any relevant BMJ Author's Self Archiving Policies, I confirm this Work has not been accepted for publication elsewhere, is not being considered for publication elsewhere and does not duplicate material already published. I confirm all authors consent to publication of this Work and authorise the granting of this licence.

1  
2  
3  
4 **1 Latent profile analysis of nurses' perceived professional benefits in**  
5  
6 **2 China: a cross-sectional study**  
7  
8  
9 **3 Running Head: LPA of nurses' perceived professional benefits**  
10  
11  
12

13  
14 5 Changli Sun<sup>1</sup>, Hu Jiang<sup>1\*</sup>, Qingfang Yao<sup>2</sup>, Xianwei Wang<sup>2</sup>, Xueke Wen<sup>1</sup> and Hanmei  
15  
16 6 Liu<sup>2</sup>,

17  
18 7 <sup>1</sup> The Third Affiliated Hospital of Zunyi Medical University (The First People's Hospital of  
19  
20 8 Zunyi), Zunyi, Guizhou, China

21  
22 9 <sup>2</sup> Zunyi Medical University, Zunyi, Guizhou, China

23  
24 10 \*Correspondence: [jianghuchn@163.com](mailto:jianghuchn@163.com), Nursing Department, The Third Affiliated  
25  
26 11 Hospital of Zunyi Medical University (The First People's Hospital of Zunyi), Zunyi,  
27  
28 12 Guizhou, China

29  
30  
31  
32  
33  
34  
35  
36  
37  
38  
39  
40  
41  
42  
43  
44  
45  
46  
47  
48  
49  
50  
51  
52  
53  
54  
55  
56  
57  
58  
59  
60

13

1  
2  
3  
4 14 **Latent profile analysis of nurses' perceived professional benefits in**  
5  
6  
7 15 **China: a cross-sectional study**

8  
9 16 **ABSTRACT**

10 17 **Objective:** To identify profiles of nurses' perceived professional benefits as well as  
11  
12  
13 18 their predictors.

14  
15 19 **Design:** Cross-sectional study.

16  
17 20 **Setting:** The study was carried out online in China.

18  
19 21 **Methods:** From July 6 and July 27, 2022, a total of 1,309 registered nurses participated  
20  
21  
22 22 in the survey by convenient sampling. We collected the Nurses' Perceived Professional  
23  
24 23 Benefits Questionnaire (NPPBQ) and demographic data. Using latent profile analysis  
24  
25 24 (LPA), subgroups of nurses' perceived professional benefits were identified. Moreover,  
26  
27 25 univariate and multinomial logistic regression analysis were conducted to find the  
28  
29 26 factors that were linked with the profiles.

30  
31 27 **Results:** The survey was validly completed by 1309 nurses, with a 92.9% effective  
32  
33 28 return rate. The findings of the LPA demonstrated three unique profiles: low perceived  
34  
35 29 professional benefits (11.8%), moderate perceived professional benefits (57.1%), and  
36  
37 30 high perceived professional benefits (31.1%). There was a correlation between marital  
38  
39 31 status, the number of night shifts per month, and leadership role.

40  
41 32 **Conclusions:** According to our research, registered nurses have three unique  
42  
43 33 professional benefit profiles. In order to sustain the nursing workforce, despite the fact  
44  
45 34 that nurses get a high level of professional benefits, interventions are necessary to  
46  
47 35 increase nurses' perception of their professional value.

48  
49  
50 37 **Keywords:** nurse, perceived professional benefits, latent profile analysis, cross-  
51  
52 38 sectional study

53  
54  
55 40 **Strengths and limitations of this study:**

- 56  
57 41 ● This is the first study to use the LPA approach to explore heterogeneous subgroups  
58  
59  
60

- 1  
2  
3  
4 42 of nurses' perceived professional benefit with a large sample size.  
5  
6 43 ● This study identified three unique professional benefit profiles among Chinese  
7  
8 44 nurses.  
9  
10 45 ● Only three influencing factors related to professional benefit profiles were found.  
11  
12 46 ● This study was limited by the web-based cross-sectional design and convenient  
13  
14 47 sampling method.  
15  
16 48

17  
18  
19  
20  
21  
22  
23  
24  
25  
26  
27  
28  
29  
30  
31  
32  
33  
34  
35  
36  
37  
38  
39  
40  
41  
42  
43  
44  
45  
46  
47  
48  
49  
50  
51  
52  
53  
54  
55  
56  
57  
58  
59  
60

For peer review only



## 49 INTRODUCTION

50 Despite the fact that nursing is a high-risk, high-stress profession, nurses are able  
51 to achieve benefit findings [1-3]. In recent years, the concept of nurses' perceived  
52 professional benefits arises naturally, and has gradually attracted the attention of  
53 researchers. Nurses' perceived professional benefits (NPPB) refer to nurses'  
54 perceptions of the gains and benefits they receive in their profession during the hiring  
55 process, as well as their belief that working in nursing can promote their overall  
56 growth and development [4, 5]. Essentially, perceived professional benefits can be  
57 classified as an emotional experience and cognitive evaluation, which has two  
58 aspects: actual benefits and spiritual benefits [4]. However, there is a lack of in-depth  
59 research on the group heterogeneity of perceived professional benefits among nurse  
60 populations.

### 61 Background

62 It is estimated that 69% of the global health workforce consists of nurses [6].  
63 Yet, the present physical and mental health of nurses is not encouraging, as they  
64 confront high levels of stress, burnout, turnover, and their own ageing [7-9]. Nursing  
65 is no longer a desirable and appealing profession [10], which makes nurse shortages a  
66 widespread worldwide concern [11]. These issues have a direct bearing on the  
67 sustainability and continued growth of the nursing workforce. In recent years, nursing  
68 in China has experienced remarkable growth, and the most recent statistics indicate  
69 that China has more than 5 million registered nurses [12]. Chinese nurses are  
70 extremely susceptible to burnout, and a high desire to leave is a serious concern [13,  
71 14]. However, there is a dearth of comprehensive study and viable remedies.

72 The mental health of nurses is receiving increasing attention from managers and  
73 researchers in the context of positive psychology. It is beginning to be recognized that  
74 nurses' own positive psychology promotes job satisfaction and professional identity,  
75 lessens burnout, and hence reduces turnover rates [15, 16].

76 The profession of nursing can be beneficial to nurses in a number of ways.  
77 Previous studies [17, 18] reported that nursing preceptorship offers many benefits,

1  
2  
3  
4 78 and nurses may find themselves being more committed to the position as a result. A  
5  
6 79 qualitative study [19] found that nurses who were involved in caring for dying  
7  
8 80 patients got a great lot of experience and benefited considerably; they can create a  
9  
10 81 personal philosophy on death and life, in addition to professional growth. Nurses who  
11  
12 82 served as advanced practice nurse roles perceived numerous benefits, including  
13  
14 83 improved patient care quality and safety, professionalism, personal development,  
15  
16 84 career development, intrinsic satisfaction with the role, and impact on other  
17  
18 85 professional groups [20]. A person's perception of professional benefit is an  
19  
20 86 endogenous motivation for his or her development and has a positive effect on that  
21  
22 87 person's career. According to prior studies, improving the perceived professional  
23  
24 88 benefit of nurses reduces burnout reduction and enables nurses to approach their work  
25  
26 89 with a good attitude and obtain more favorable comments [21, 22].

27  
28 90 Measures created by researchers to evaluate the perceived professional benefits  
29  
30 91 of nurses were still in little supply. The Preceptor's Perspective of Benefits and  
31  
32 92 Rewards (PPBR) measure was designed by Dibert, et al. [23] to evaluate the  
33  
34 93 perceived benefits of clinical preceptor nurses, however, it is not relevant to general  
35  
36 94 clinical nurses. A questionnaire entitled Nurses' Perceived Professional Benefits  
37  
38 95 Questionnaire (NPPBQ) was developed to assess how Chinese nurses perceive the  
39  
40 96 gains and benefits of their employment [5, 24]. This questionnaire has been utilized in  
41  
42 97 a lot of research to date. While we now have a better grasp of nurses' perceptions of  
43  
44 98 professional benefits, but the heterogeneity of the population is still lack, screening  
45  
46 99 strategies for future precision interventions cannot be developed for identifying low-  
47  
48 100 benefit populations.

49  
50 101 To our knowledge, it has not been shown that sufficient evidence exists to  
51  
52 102 answer the questions of whether nurses' perceived professional benefits differ in  
53  
54 103 groups and what factors contribute to these differences. The current study was created  
55  
56 104 to bridge that gap. This study's objective was to examine the characteristics and  
57  
58 105 determinants of nurses' perceived professional benefits as well as the predictors of  
59  
60 106 these latent profiles.

1  
2  
3  
4 1075 108 **MATERIALS AND METHODS**7 109 **Study design**

9 110 An online survey with convenient sampling was used in this study to conduct a cross-  
11 111 sectional analysis. This study was designed and reported in accordance with the  
13 112 guidelines for Strengthening the Reporting of Observational Studies in Epidemiology  
15 113 (STROBE)[25].

17 114

19 115 **Sample size estimation**

21 116 An examination of the latent profiles of perceived professional benefits among  
23 117 nurses was conducted in this study. LPA needs a sample size larger than 500 [26, 27],  
25 118 therefore, the minimum sample size for this study was 500.

27 119

29 120 **Participants**

31 121 Participants in this study required to meet the inclusion criteria and be registered  
33 122 nurses. To be considered, candidates had to satisfy the following criteria to be  
35 123 considered: (1) having worked as a nurse in a medical facility, and (2) being willing to  
37 124 participate in this study. The following were the exclusion criteria: logical errors or  
39 125 missing information in questionnaire answers.

41 126

43 127 **Measurements**45 128 **Demographic**

47 129 This study gathered and evaluated demographic data including age, gender, greatest  
49 130 degree of education, marital status, and other participant characteristics.

51 131

53 132 **Nurses' Perceived Professional Benefits Questionnaire (NPPBQ)**

55 133 The questionnaire was designed by Jing Hu, et al. [5] to investigate the gains and  
57 134 benefits that nurses perceived from their jobs. The authors then reduced it to 17 items  
59 135 by 2020 [24]. The questionnaire has five dimensions: personal growth, a good nurse-

60

1  
2  
3  
4 136 patient relationship, recognition from family and friends, a positive occupational  
5  
6 137 perception, and team belonging. Items are scored on a 5-point Likert scale (1 =  
7  
8 138 strongly disagree, 2 = disagree, 3 = not sure, 4 = agree, 5 = strongly agree).  
9  
10 139 Cronbach's alphas for the questionnaires were 0.94, and the NPPBQ  
11  
12 140 subquestionnaires' alphas were 0.84, 0.83, 0.74, 0.79, and 0.85.  
13  
14 141

#### 15 142 **Data collection**

17 143 During the dates of July 6 and July 27, 2022, data was gathered. Wenjuanxing  
18  
19 144 (www.wjx.cn) was used to develop a web-based questionnaire. Two researchers  
20  
21 145 reviewed the online questionnaire for rigor and verified the feasibility of the  
22  
23 146 questionnaire by completing it within the team. A poster was created to present the  
24  
25 147 link and QR code. It was clearly shown on the poster who would be included and  
26  
27 148 excluded from the survey. We distributed the questionnaire nationwide in China and  
28  
29 149 did not limit the source and setting of nurses. The researcher contacted administrators  
30  
31 150 or general nurses to disseminate the questionnaire. Wechat was used to send the  
32  
33 151 poster and information letter. The survey can be completed by clicking on the link or  
34  
35 152 scanning the QR code, completed questionnaires can be returned directly to the web.  
36  
37 153

#### 38 154 **Statistical analyses**

40 155 The use of latent profile analysis (LPA) is frequently used to determine the  
41  
42 156 number of subpopulations in a given sample. LPA is a statistical method that use  
43  
44 157 potential category variables to explain the link between exogenous continuous-type  
45  
46 158 indicators, permitting the assessment of the correlation between exogenous indicators  
47  
48 159 and the maintenance of local independence among exogenous indicators [27]. Latent  
49  
50 160 profile analysis was conducted using Mplus 7.4 software. Log likelihood (LL),  
51  
52 161 Akaike information criterion (AIC), Akaike Information Criterion (BIC), Adjusted  
53  
54 162 Bayesian Information Criteria (aBIC), Entropy, Lo-Mendell-Rubin (LMR), and the  
55  
56 163 Bootstrapped Likelihood Ratio Test (BLRT) were used to assess model fit and  
57  
58 164 determine the appropriate number of categories. In order to decide which model best  
59  
60

1  
2  
3  
4 165 fit the data, the models from each category's fitting results were combined with the  
5  
6 166 aforementioned indicators. The data was examined using the SPSS 26.0 statistical  
7  
8 167 program. We utilized frequency and composition ratios for categorical data, whereas  
9  
10 168 mean and standard deviation were utilized for continuous variables. The chi-square  
11  
12 169 test was performed to compare category variables across groups. ANOVA was used  
13  
14 170 to compare continuous variables among multiple groups. A multivariate logistic  
15  
16 171 regression model was employed to analyze the variations in demographic variables. A  
17  
18 172 statistically significant difference was indicated by  $p < 0.05$ .

19  
20 173

#### 21 174 **Ethical considerations**

22  
23 175 The Ethics Committee of the First People's Hospital of Zunyi (2022-016) approved  
24  
25 176 the study, and participants gave permission for data collection. Prior to completing the  
26  
27 177 survey, participants will be provided with information about the purpose of the study  
28  
29 178 and the major substance of the research. They will then be able to provide their  
30  
31 179 informed consent through a yes or no response. In addition, participants were also  
32  
33 180 informed that the study's findings would be given in aggregate form and that no  
34  
35 181 participant could be identified. If a person declined to complete the questionnaire, the  
36  
37 182 collection was immediately ended.

38  
39 183

#### 40 184 **Patient and public involvement**

41  
42 185 Patients and/or the public were not involved in the design, or conduct, or reporting, or  
43  
44 186 dissemination plans of this research.

45  
46 187

## 47 188 **RESULTS**

### 48 189 **Participant characteristics**

49  
50 190 A total of 1409 nurses completed the questionnaire, while 58 nurses denied  
51  
52 191 participation, for a total number of 1351 questionnaires received. 42 surveys were  
53  
54 192 considered invalid due to insufficient or inaccurate information. 92.9 percent of the  
55  
56 193 final 1309 surveys were correctly returned. The ages of the participants varied from 18  
57  
58  
59  
60

194 to 59 years old, with a mean age of 32.25 (SD: 6.18) years old. The bulk of participants  
195 were female (86.7%), whereas the minority were male (3.2%).

196

### 197 **Characteristics of the different classes**

198 On the basis of the NPPBQ's five dimensions, it was established that a model with three  
199 latent classes provided the greatest match. A class represents different categorisation  
200 methods, such as a class 1 for a single subgroup, a class 2 for two heterogeneous  
201 subgroups, and so forth. Table 1 provides the results. While the AIC and BIC in class  
202 4 were lower in class 4 than in class 3, the entropy was greater; nonetheless, the lowest  
203 category probability in class 4 was 1.4%, which is unsatisfactory. As a consequence,  
204 we decided that the best-fitting model is class 3. Using a three-class model, Figure 1  
205 illustrates the mean scores for each category within the NPPBQ's dimensions. The  
206 percentages increase from class 1 to class 3 as follows: 11.8% (155 nurses), 57.1% (747  
207 nurses), and 31.1% (407 nurses). For the sake of brevity, based on the profile scores,  
208 we named class 1 as the low perceived professional benefits, class 2 as the moderate  
209 perceived professional benefits, and class 3 as the high perceived professional benefits.

210 **Table 1** Potential profile analysis indicators ( $N=1309$ )

| Model   | LL <sup>a</sup> | AIC <sup>b</sup> | BIC <sup>c</sup> | aBIC <sup>d</sup> | Entropy | LMR <sup>e</sup><br><i>p</i> -value | BLRT <sup>f</sup><br><i>p</i> -value | Category probability    |
|---------|-----------------|------------------|------------------|-------------------|---------|-------------------------------------|--------------------------------------|-------------------------|
| Class 1 | -<br>14709.353  | 29438.706        | 29490.476        | 29458.711         | -       | -                                   | -                                    | -                       |
| Class 2 | -<br>13420.425  | 26872.850        | 26955.682        | 26904.857         | 0.905   | <<br>0.001                          | < 0.001                              | 0.654/0.346             |
| Class 3 | -<br>12583.629  | 25211.257        | 25325.152        | 25255.268         | 0.936   | 0.007                               | < 0.001                              | 0.118/0.571/0.311       |
| Class 4 | -<br>12307.807  | 24671.613        | 24816.570        | 24727.627         | 0.940   | 0.036                               | < 0.001                              | 0.151/0.014/0.530/0.306 |

211

212 a Log likelihood, b Akaike information criterion, c Bayesian information criterion, d Adjusted  
213 bayesian information criterion, e Lo-Mendell-Rubin Likelihood Ratio Test, f Bootstrapped  
214 Likelihood Ratio Test

215

1  
2  
3  
4 **216 The scale and dimension scores of different profiles**

5  
6 **217** The findings of a one-way ANOVA indicated statistically significant differences in the  
7  
8 **218** scale and dimension scores of different profiles (both  $p < 0.001$ ). The results were shown  
9  
10 **219** in Figure 2 demonstrates the outcomes.

11  
12 **220**

13  
14 **221 Demographic and related characteristics of each profile**

15  
16 **222** The ANOVA and chi-square tests indicated statistically significant differences  
17  
18 **223** between the three profiles differed statistically in terms of age, marital status, children,  
19  
20 **224** professional title, leadership role, working years, and number of night shifts per month.  
21  
22 **225** Table 2 is a summary of the results.

23 **226 Table 2** Demographic and characteristics by latent profile ( $N=1309$ )

| Variables                | Class 1      | Class 2         | Class 3      | $\chi^2/F$ | $p$     |
|--------------------------|--------------|-----------------|--------------|------------|---------|
| Age (SD)                 | 30.94 (5.37) | 31.76<br>(5.91) | 33.64 (6.71) | 16.545     | < 0.001 |
| Gender                   |              |                 |              | 0.600      | 0.741   |
| Male                     | 6 (3.9)      | 25 (3.3)        | 11 (2.7)     |            |         |
| Female                   | 149 (96.1)   | 722 (96.7)      | 396 (97.3)   |            |         |
| Highest Degree           |              |                 |              | 1.602      | 0.449   |
| Junior college and below | 29 (18.7)    | 111 (14.9)      | 60 (14.7)    |            |         |
| Bachelor's and above     | 126 (81.3)   | 636 (85.1)      | 347 (85.3)   |            |         |
| Marital status           |              |                 |              | 25.768     | < 0.001 |
| Single/divorced/widowed  | 62 (40.0)    | 218 (29.2)      | 80 (19.7)    |            |         |
| Married                  | 93 (60.0)    | 529 (70.8)      | 327 (80.3)   |            |         |
| Children                 |              |                 |              | 26.943     | < 0.001 |
| Yes                      | 87 (56.1)    | 481 (64.4)      | 311 (76.4)   |            |         |
| No                       | 68 (43.9)    | 266 (35.6)      | 96 (23.6)    |            |         |
| Professional title       |              |                 |              | 23.589     | < 0.001 |

|                                  |            |            |            |        |         |
|----------------------------------|------------|------------|------------|--------|---------|
| Junior Level                     | 102 (65.8) | 448 (60.0) | 207 (50.9) |        |         |
| Intermediate level               | 50 (32.3)  | 280 (37.5) | 172 (42.3) |        |         |
| Senior level                     | 3 (1.9)    | 19 (2.5)   | 28 (6.9)   |        |         |
| Leadership role                  |            |            |            | 17.086 | < 0.001 |
| Yes                              | 18 (11.6)  | 86 (11.5)  | 82 (20.1)  |        |         |
| No                               | 137 (88.4) | 661 (88.5) | 325 (79.9) |        |         |
| Working years (years)            |            |            |            | 32.903 | < 0.001 |
| ≤5                               | 52 (33.5)  | 217 (29.0) | 79 (19.4)  |        |         |
| 6–15                             | 91 (58.7)  | 438 (58.6) | 241 (59.2) |        |         |
| ≥16                              | 12 (7.7)   | 92 (12.3)  | 87 (21.4)  |        |         |
| Average monthly income (yuan)*   |            |            |            | 7.990  | 0.239   |
| ≤3000                            | 23 (14.8)  | 75 (10.0)  | 43 (10.6)  |        |         |
| 3001~6000                        | 93 (60.0)  | 415 (55.6) | 217 (53.3) |        |         |
| 6001~9000                        | 27 (17.4)  | 179 (24.0) | 105 (25.8) |        |         |
| ≥9001                            | 12 (7.7)   | 78 (10.4)  | 42 (10.3)  |        |         |
| Number of night shifts per month |            |            |            | 17.797 | 0.001   |
| 0                                | 42 (27.1)  | 233 (31.2) | 164 (40.3) |        |         |
| 1–4                              | 22 (14.2)  | 143 (19.1) | 73 (17.9)  |        |         |
| ≥5                               | 91 (58.7)  | 371 (49.7) | 170 (41.8) |        |         |

227

228 \* 1 USD equals 7.31 Chinese Yuan, exchange rate on September 29, 2023

229

230 A multivariate logistic regression model was constructed using the variables with  
 231 statistically significant differences as determined by ANOVA and chi-square tests. Of  
 232 the three profiles, the class 3 was chosen as a reference to find the predictors linked  
 233 with NPPBQ. As shown in Table 3, nurses who were single/divorced/widowed were



234 more likely to belonged to low perceived professional benefits (*OR*: 1.984,  
 235 95%*CI*:1.028-3.828). The number of night shifts worked per month was associated with  
 236 low perceived professional benefits (*OR*: 0.633, 95% *CI*: 0.405-0.988), compared to  
 237 those with more than five night shifts, those without night shifts tended to fall into the  
 238 high perceived professional benefits. Nurses without a leadership role were more likely  
 239 to be in the moderate perceived professional benefits (*OR*: 1.489, 95% *CI*: 1.028-2.157).  
 240 Other variables were not statistically significant in the multivariate logistic regression.

241

242

243

244

245

**Table 3** Predictors of latent profile membership

| Variables               | Class 1 VS Class 3 |           |               | Class 2 VS Class 3 |           |               |
|-------------------------|--------------------|-----------|---------------|--------------------|-----------|---------------|
|                         | $\beta$            | <i>OR</i> | 95% <i>CI</i> | $\beta$            | <i>OR</i> | 95% <i>CI</i> |
| Age (SD)                | 0.004              | 1.004     | 0.941-1.070   | -0.005             | 0.995     | 0.957-1.034   |
| Marital status          |                    |           |               |                    |           |               |
| Single/divorced/widowed | 0.685              | 1.984*    | 1.028-3.828   | 0.115              | 1.122     | 0.716-1.760   |
| Married (Ref)           |                    |           |               |                    |           |               |
| Children                |                    |           |               |                    |           |               |
| No                      | 0.177              | 1.194     | 0.622-2.293   | 0.240              | 1.272     | 0.822-1.967   |
| Yes (Ref)               |                    |           |               |                    |           |               |
| Professional title      |                    |           |               |                    |           |               |
| Junior level            | 0.368              | 1.444     | 0.334-6.241   | 0.359              | 1.433     | 0.661-3.105   |
| Intermediate level      | 0.378              | 1.460     | 0.370-5.766   | 0.429              | 1.535     | 0.764-3.085   |
| Senior level (Ref)      |                    |           |               |                    |           |               |
| Leadership role         |                    |           |               |                    |           |               |
| No                      | 0.139              | 1.984     | 1.028-3.828   | 0.398              | 1.489*    | 1.028-2.157   |
| Yes (Ref)               |                    |           |               |                    |           |               |
| Working years (years)   |                    |           |               |                    |           |               |

|    |                            |        |        |             |        |       |             |
|----|----------------------------|--------|--------|-------------|--------|-------|-------------|
| 1  |                            |        |        |             |        |       |             |
| 2  |                            |        |        |             |        |       |             |
| 3  |                            |        |        |             |        |       |             |
| 4  | ≤5                         | 0.781  | 2.184  | 0.666-7.161 | 0.411  | 1.508 | 0.748-3.042 |
| 5  |                            |        |        |             |        |       |             |
| 6  | 6–15                       | 0.721  | 2.057  | 0.847-5.000 | 0.228  | 1.256 | 0.773-2.039 |
| 7  |                            |        |        |             |        |       |             |
| 8  | ≥16 (Ref)                  |        |        |             |        |       |             |
| 9  | Number of night shifts per |        |        |             |        |       |             |
| 10 | month                      |        |        |             |        |       |             |
| 11 |                            |        |        |             |        |       |             |
| 12 | 0                          | -0.458 | 0.633* | 0.405-0.988 | -0.223 | 0.800 | 0.601-1.064 |
| 13 |                            |        |        |             |        |       |             |
| 14 | 1–4                        | -0.354 | 0.702  | 0.400-1.231 | 0.089  | 1.094 | 0.768-1.558 |
| 15 |                            |        |        |             |        |       |             |
| 16 | ≥5 (Ref)                   |        |        |             |        |       |             |

246 \* $p < 0.05$ ; OR, Odds ratio; 95% CI, 95% Confidence Interval; Ref, Reference.

## 247 **DISCUSSION**

248 The purpose of this research was to identify distinct profiles of nurses' perceived  
249 professional benefits. Furthermore, the current study employed multinomial logistic  
250 regression to investigate predictors of these profiles.

251 In this study, we investigated 1309 nurses who validly completed the questionnaire.  
252 As a result, three latent profiles were identified: low perceived professional benefits,  
253 moderate perceived professional benefits, and high perceived professional benefits. Our  
254 research revealed that the majority of nurses had a moderate or higher levels of  
255 perceived professional benefits, with just 11.8% of nurses belonging to the category of  
256 nurses with low perceived professional benefits. Most studies reported nurses had an  
257 upper-moderate level of perceived professional benefits [28, 29], and our findings are  
258 consistent with those of previous studies. Most importantly, our study clarified the  
259 heterogeneous subgroups of nurses' perceived professional benefits and their specific  
260 distribution.

261 In the last three years, nurses have been a key part of the fight against the COVID-  
262 19 outbreak. Despite heavy job pressure, nurses have had a feeling of professional  
263 calling and value [30], which has effectively enhanced their sense of professional  
264 benefit [1]. At the same time, the critical role of nurses in defending people's lives and  
265 health has earned the society's respect and recognition, as well as a positive social image  
266 [31, 32], which can further enhance nurses' sense of professional benefit. Our survey  
267 was conducted during the COVID-19 epidemic, and nurses' perceptions of professional  
268 benefit may be elevated.

269 Another finding of our study revealed that the membership of profiles can be  
270 predicted by some characteristics such as the number of night shifts, leadership role,  
271 and marriage status. Nursing is a continuous, 24-hour profession, and nurse's work  
272 normally takes the form of night shifts. It is widely proven that night shifts negatively  
273 impact the physical and emotional health of nurses [33-36]. Nurses working rotating  
274 night shifts were normally younger, and they had the lower scores of job satisfaction,  
275 quality of sleep, and quantity of sleep [37], these factors resulted in a low perceived

1  
2  
3  
4 276 professional benefits. Consistent with past research, our findings indicate that the  
5  
6 277 greater the frequency of night shifts, the lower the perceived professional benefit [29].  
7

8 278 According to our results, 57.1% of nurses perceived professional benefits as  
9  
10 279 moderate. The majority of nurses in the moderate perceived professional benefits  
11  
12 280 group lacked a work title, while the majority of nurses in the highly perceived  
13  
14 281 professional benefits group held a leadership role. This has been validated by other  
15  
16 282 research, and our work provides more support for this notion [29]. Holding a  
17  
18 283 managerial position at a hospital is a means of advancing one's career, and nurses  
19  
20 284 highly value this opportunity.

21 285 Our study found that nurses who were single/divorced/widowed were more likely  
22  
23 286 to belong to low perceived professional benefits, which is consistent with earlier  
24  
25 287 findings [29]. This may be because, unlike single/divorced/widowed nurses, married  
26  
27 288 nurses receive more social support from their spouses and other family members.

28  
29 289 We hypothesized that job fulfillment and social support are important influencing  
30  
31 290 mechanisms that affect nurses' perceived professional benefits. The number of night  
32  
33 291 shifts, leadership roles are important indicators of nurses' job fulfillment. Marital status  
34  
35 292 is an important factor in social support. Each of these factors can have varying degrees  
36  
37 293 of impact on the actual benefit or spiritual benefit [4]. Considering that nurses perceive  
38  
39 294 professional benefits as a result of personal, organizational, environmental, and social  
40  
41 295 factors, a well-developed theoretical framework is required to explain this phenomenon.

42 296 Unfortunately, our research failed to demonstrate that the profiles can be predicted  
43  
44 297 by other factors in the model variables. Our findings in the univariate analysis results  
45  
46 298 were consistent with earlier research. Nevertheless, because the bulk of prior research  
47  
48 299 did not employ multi-factor models, it was impossible to compare our findings could  
49  
50 300 not be compared to those of others. In addition, certain putative contributing elements  
51  
52 301 were not adequately proven, and further research is required to confirm them in the  
53  
54 302 future.

55  
56 303 Our research has theoretical and practical implications for the future study of  
57  
58 304 nurses' perceived professional benefits. First, the number of night shifts, leadership  
59  
60

1  
2  
3  
4 305 role, and marriage status are the most significant factors affecting nurses' perceived  
5  
6 306 professional benefits, and in the future, we should focus on the degree of influence of  
7  
8 307 these three factors and explore the mechanisms from the theoretical level. Second,  
9  
10 308 managers should pay active attention to the perceived professional benefits of clinical  
11  
12 309 nurses, create a favorable working environment and professional growth atmosphere,  
13  
14 310 and promote the professional success of nurses. Given that 11.8% of nurses still have  
15  
16 311 a low perceived sense of career benefit, more tailored intervention programs are still  
17  
18 312 needed in the future.

19 313

### 20 314 **Strengths and limitations**

21  
22  
23 315 To the best of our knowledge, this is the first study to use the LPA approach to explore  
24  
25 316 heterogeneous subgroups of nurses' perceived professional benefit with a large sample  
26  
27 317 size, and we presented a unique perspective and a basis for future research on the  
28  
29 318 perceived career benefits of nurses. The research was limited in some ways. First, this  
30  
31 319 was a web-based survey, and the sample process and self-reporting strategy may have  
32  
33 320 resulted in some bias. Second, we only polled nurses in mainland China, and our sample  
34  
35 321 only reflected the current situation in a single nation. Lastly, the constraints of the  
36  
37 322 study's design prohibited an in-depth assessment of the psychological factors behind  
38  
39 323 nurses' perceptions of their professional benefit. As a result, more rigorously designed  
40  
41 324 studies will be required in the future to investigate this issue in depth.

42 325

### 43 326 **CONCLUSION**

44  
45  
46 327 Our study identified three professional benefits profiles among nurses. The results of  
47  
48 328 our study indicated that nurses enjoy a high level of professional benefits.

49  
50 329 Notwithstanding the study's limitations of the study and the present condition of  
51  
52 330 nursing, it is vital that we engage on several levels to encourage a stable nursing  
53  
54 331 workforce, including policy, organisation, financial income, and career development,  
55  
56 332 so that nurses experience a sense of professional gain.

57  
58 333

1  
2  
3  
4 334 **Acknowledgements**

5 335 None.

6  
7 336 **AUTHOR CONTRIBUTIONS**

8  
9 337 Jiang Hu and Sun Changli were responsible for the conception and study design. Yao

10  
11 338 Qiangfang, Wang Xianwei and Liu Hanmei performed the data collection. Yao

12  
13 339 Qiangfang, Wang Xianwei and Wen Xueke contributed to the analysis of the data.

14  
15 340 Sun Changli and Jiang Hu were involved in drafting the manuscript and revising it.

16  
17 341 All authors have read and approved the final manuscript.

18  
19 342 **FUNDING**

20  
21 343 This study was funded by the Science and Technology Joint Funds of Zunyi Science

22  
23 344 and Technology Bureau (2023-73).

24  
25 345 **CONFLICT OF INTEREST**

26  
27 346 The authors have no conflicts of interest to declare.

28  
29 347 **Ethics approval**

30  
31 348 This study involves human participants and was approved by the Ethics Committee of

32  
33 349 the First People's Hospital of Zunyi (2022-016). Participants gave informed consent to

34  
35 350 participate in the study before taking part.

36  
37 351 **Data availability statement**

38  
39 352 Data are available upon reasonable request. Data are available from the corresponding

40  
41 353 author and the first author on reasonable request.

42  
43 354

355 **REFERENCES**

- 356 1. Wang X, Chen F, Dai P, Lin X, Qi L: **Perceived professional benefits and associated**  
357 **factors among nurses during the COVID-19 pandemic: A cross-sectional study.** *Nurs*  
358 *Open* 2023, **10**(3):1461-1470.
- 359 2. Jiang H, Huang N, Tian W, Shi S, Yang G, Pu H: **Factors Associated With Post-**  
360 **traumatic Stress Disorder Among Nurses During COVID-19.** *Front Psychol* 2022,  
361 **13**:745158.
- 362 3. Liu S, Duan X, Han P, Shao H, Jiang J, Zeng L: **Occupational benefit perception of**  
363 **acute and critical care nurses: A qualitative meta-synthesis.** *Front Public Health* 2022,  
364 **10**:976146.
- 365 4. Zhou H, Zhu Y, Zhang X, Peng J, Li Q, Wang X, Wang L, Cai X, Lan L: **Psychological**  
366 **Capital and Perceived Professional Benefits: Testing the Mediating Role of Perceived**  
367 **Nursing Work Environment Among Chinese Nurses.** *J Psychosoc Nurs Ment Health*  
368 *Serv* 2018, **56**(4):38-47.
- 369 5. Hu J, Liu X: **The preparation of nurses' occupational benefit questionnaire and its**  
370 **reliability and validity test [J].** *J Chin People's Liberation Army* 2013, **30**(22):1-5.
- 371 6. Malone B: **A Perspective on the State of the World's Nursing Report.** *Nurs Adm Q* 2021,  
372 **45**(1):6-12.
- 373 7. Ivziku D, de Maria M, Ferramosca FMP, Greco A, Tartaglini D, Gualandi R: **What**  
374 **determines physical, mental and emotional workloads on nurses? A cross-sectional**  
375 **study.** *J Nurs Manag* 2022, **30**(8):4387-4397.
- 376 8. Morgan B, Jordan L, Rivera LA: **Considerations for an aging nurse anesthetists**

- 1  
2  
3  
4 377 workforce. *Geriatr Nurs* 2020, **41**(6):1017-1019.
- 5  
6 378 9. Tamata AT, Mohammadnezhad M: **A systematic review study on the factors affecting**  
7  
8  
9 379 **shortage of nursing workforce in the hospitals.** *Nurs Open* 2023, **10**(3):1247-1257.
- 10  
11 380 10. van der Cingel M, Brouwer J: **What makes a nurse today? A debate on the nursing**  
12  
13 381 **professional identity and its need for change.** *Nurs Philos* 2021, **22**(2):e12343.
- 14  
15  
16  
17 382 11. Udod S: **A Call for Urgent Action: Innovations for Nurse Retention in Addressing the**  
18  
19 383 **Nursing Shortage.** *Nurs Rep* 2023, **13**(1):145-147.
- 20  
21  
22 384 12. **China Statistical Yearbook** [<http://www.stats.gov.cn/sj/ndsj/2022/indexch.htm>]
- 23  
24  
25 385 13. Zeng LN, Zhang JW, Zong QQ, Chan SW, Browne G, Ungvari GS, Chen LG, Xiang  
26  
27 386 **YT: Prevalence of burnout in mental health nurses in China: A meta-analysis of**  
28  
29 387 **observational studies.** *Arch Psychiatr Nurs* 2020, **34**(3):141-148.
- 30  
31  
32 388 14. Chen JP, Dai YM, Qin Y, Liang SP, Cheng G, Liu Y, Yang CZ, He HG, Shen Q: **Factors**  
33  
34 389 **influencing turnover intention among male nurses in China: A large-scale descriptive**  
35  
36 390 **correlational study.** *Int Nurs Rev* 2023.
- 37  
38  
39  
40 391 15. Yu JF, Ding YM, Jia RY, Liang DD, Wu Z, Lu GL, Chen CR: **Professional identity and**  
41  
42 392 **emotional labour affect the relationship between perceived organisational justice and**  
43  
44 393 **job performance among Chinese hospital nurses.** *J Nurs Manag* 2022, **30**(5):1252-  
45  
46 394 1262.
- 47  
48  
49  
50 395 16. Lin L, Liu X, He G: **Mindfulness and Job Satisfaction Among Hospital Nurses: The**  
51  
52 396 **Mediating Roles of Positive Affect and Resilience.** *J Psychosoc Nurs Ment Health Serv*  
53  
54 397 2020, **58**(6):46-55.
- 55  
56  
57  
58 398 17. Macey A, Green C, Jarden RJ: **ICU nurse preceptors' perceptions of benefits, rewards,**  
59  
60



- 1  
2  
3  
4 399 **supports and commitment to the preceptor role: A mixed-methods study.** *Nurse Educ*  
5  
6 400 *Pract* 2021, **51**:102995.  
7  
8  
9 401 18. Natan MB, Qeadan H, Egbaria W: **The commitment of Israeli nursing preceptors to the**  
10  
11 402 **role of preceptor.** *Nurse Educ Today* 2014, **34**(12):1425-1429.  
12  
13  
14 403 19. Zheng RS, Guo QH, Dong FQ, Owens RG: **Chinese oncology nurses' experience on**  
15  
16 404 **caring for dying patients who are on their final days: a qualitative study.** *Int J Nurs Stud*  
17  
18 405 2015, **52**(1):288-296.  
19  
20  
21 406 20. Christiansen A, Vernon V, Jinks A: **Perceptions of the benefits and challenges of the**  
22  
23 407 **role of advanced practice nurses in nurse-led out-of-hours care in Hong Kong: a**  
24  
25 408 **questionnaire study.** *J Clin Nurs* 2013, **22**(7-8):1173-1181.  
26  
27  
28 409 21. Wu B, Zhao Y, Xu D, Wang Y, Niu N, Zhang M, Zhi X, Zhu P, Meng A: **Factors**  
29  
30 410 **associated with nurses' willingness to participate in care of patients with COVID-19: A**  
31  
32 411 **survey in China.** *J Nurs Manag* 2020, **28**(7):1704-1712.  
33  
34  
35 412 22. Liu X, Ju X, Liu X: **The relationship between resilience and intent to stay among**  
36  
37 413 **Chinese nurses to support Wuhan in managing COVID-19: The serial mediation effect**  
38  
39 414 **of post-traumatic growth and perceived professional benefits.** *Nurs Open* 2021,  
40  
41 415 **8**(5):2866-2876.  
42  
43  
44 416 23. Dibert C, Goldenberg D: **Preceptors' perceptions of benefits, rewards, supports and**  
45  
46 417 **commitment to the preceptor role.** *J Adv Nurs* 1995, **21**(6):1144-1151.  
47  
48  
49 418 24. Hu Y, Hu J, Li L, Zhao B, Liu X, Li F: **Development and preliminary validation of a brief**  
50  
51 419 **nurses' perceived professional benefit questionnaire (NPPBQ).** *BMC Med Res*  
52  
53 420 *Methodol* 2020, **20**(1):18.  
54  
55  
56  
57  
58  
59  
60

- 1  
2  
3  
4 421 25. von Elm E, Altman DG, Egger M, Pocock SJ, Gøtzsche PC, Vandenbroucke JP: **The**  
5  
6 422 **Strengthening the Reporting of Observational Studies in Epidemiology (STROBE)**  
7  
8  
9 423 **Statement: guidelines for reporting observational studies.** *Int J Surg* 2014, **12**(12):1495-  
10  
11 424 1499.
- 12  
13  
14 425 26. Nylund KL, Asparouhov T, Muthén BO: **Deciding on the number of classes in latent**  
15  
16 426 **class analysis and growth mixture modeling: A Monte Carlo simulation study.** *Structural*  
17  
18 427 *equation modeling: A multidisciplinary Journal* 2007, **14**(4):535-569.
- 19  
20  
21  
22 428 27. Spurk D, Hirschi A, Wang M, Valero D, Kauffeld S: **Latent profile analysis: A review**  
23  
24 429 **and "how to" guide of its application within vocational behavior research.** *Journal of*  
25  
26 430 *vocational behavior* 2020, **120**:103445.
- 27  
28  
29  
30 431 28. Ma HW, Dan X, Xu SH, Hou RN, Zhao NM: **[Current status of nurses' perceived**  
31  
32 432 **professional benefits and influencing factors in 3A-level hospitals in Tianjin].** *Zhonghua*  
33  
34 433 *Lao Dong Wei Sheng Zhi Ye Bing Za Zhi* 2017, **35**(6):443-447.
- 35  
36  
37  
38 434 29. Zhan T, Li H, Ding X: **Can social support enhance sense of coherence and perceived**  
39  
40 435 **professional benefits among Chinese registered nurses? A mediation model.** *J Nurs*  
41  
42 436 *Manag* 2020, **28**(3):488-494.
- 43  
44  
45  
46 437 30. Savitsky B, Radomislensky I, Hendel T: **Nurses' occupational satisfaction during Covid-**  
47  
48 438 **19 pandemic.** *Appl Nurs Res* 2021, **59**:151416.
- 49  
50  
51 439 31. Mohammed S, Peter E, Killackey T, Maciver J: **The "nurse as hero" discourse in the**  
52  
53 440 **COVID-19 pandemic: A poststructural discourse analysis.** *Int J Nurs Stud* 2021,  
54  
55 441 **117**:103887.
- 56  
57  
58 442 32. Begnini D, Cicolella DA, Freitas KR, Maranhão T, Rocha CMF, Kruse MHL: **Heroines**  
59  
60

- 1  
2  
3  
4 443 in Covid-19 times: visibility of nursing in the pandemic. *Rev Gaucha Enferm* 2021,  
5  
6 444 42(spe):e20200373.  
7  
8  
9 445 33. James L, Elkins-Brown N, Wilson M, James SM, Dotson E, Edwards CD, Wintersteen-  
10  
11 446 Arleth L, Stevens K, Butterfield P: **The effects of three consecutive 12-hour shifts on**  
12  
13 447 **cognition, sleepiness, and domains of nursing performance in day and night shift**  
14  
15 448 **nurses: A quasi-experimental study.** *Int J Nurs Stud* 2021, 123:104041.  
16  
17  
18  
19 449 34. Weaver SH, de Cordova PB, Vitale TR, Hargwood P, Salmond S: **Experiences and**  
20  
21 450 **perceptions of nurses working night shift: a qualitative systematic review.** *JBI Evid*  
22  
23 451 *Synth* 2023, 21(1):33-97.  
24  
25  
26  
27 452 35. Borroni E, Frigerio G, Polledri E, Mercadante R, Maggioni C, Fedrizzi L, Pesatori AC,  
28  
29 453 Fustinoni S, Carugno M: **Metabolomic profiles in night shift workers: A cross-sectional**  
30  
31 454 **study on hospital female nurses.** *Front Public Health* 2023, 11:1082074.  
32  
33  
34  
35 455 36. Jørgensen JT, Rozing MP, Westendorp RGJ, Hansen J, Stayner LT, Simonsen MK,  
36  
37 456 Andersen ZJ: **Shift work and incidence of psychiatric disorders: The Danish Nurse**  
38  
39 457 **Cohort study.** *J Psychiatr Res* 2021, 139:132-138.  
40  
41  
42  
43 458 37. Ferri P, Guadi M, Marcheselli L, Balduzzi S, Magnani D, Di Lorenzo R: **The impact of**  
44  
45 459 **shift work on the psychological and physical health of nurses in a general hospital: a**  
46  
47 460 **comparison between rotating night shifts and day shifts.** *Risk Manag Healthc Policy*  
48  
49 461 2016, 9:203-211.  
50  
51  
52  
53 462  
54 463  
55  
56  
57  
58  
59  
60

1  
2  
3  
4 464 **Figure 1** Latent profiles of NPPBQ

5  
6 465

7 466 **Figure 2** The scale and dimension scores of different profiles

8  
9 467

10  
11 468

12  
13  
14  
15  
16  
17  
18  
19  
20  
21  
22  
23  
24  
25  
26  
27  
28  
29  
30  
31  
32  
33  
34  
35  
36  
37  
38  
39  
40  
41  
42  
43  
44  
45  
46  
47  
48  
49  
50  
51  
52  
53  
54  
55  
56  
57  
58  
59  
60

For peer review only

1  
2  
3  
4  
5  
6  
7  
8  
9  
10  
11  
12  
13  
14  
15  
16  
17  
18  
19  
20  
21  
22  
23  
24  
25  
26  
27  
28  
29  
30  
31  
32  
33  
34  
35  
36  
37  
38  
39  
40  
41  
42  
43  
44  
45  
46  
47  
48  
49  
50  
51  
52  
53  
54  
55  
56  
57  
58  
59  
60



Latent profiles of NPPBQ  
145x76mm (300 x 300 DPI)

1  
2  
3  
4  
5  
6  
7  
8  
9  
10  
11  
12  
13  
14  
15  
16  
17  
18  
19  
20  
21  
22  
23  
24  
25  
26  
27  
28  
29  
30  
31  
32  
33  
34  
35  
36  
37  
38  
39  
40  
41  
42  
43  
44  
45  
46  
47  
48  
49  
50  
51  
52  
53  
54  
55  
56  
57  
58  
59  
60



The scale and dimension scores of different profiles

145x114mm (300 x 300 DPI)

STROBE Statement—Checklist of items that should be included in reports of *cross-sectional studies*

|                           | Item No | Recommendation                                                                                                                                                                                               | Page No |
|---------------------------|---------|--------------------------------------------------------------------------------------------------------------------------------------------------------------------------------------------------------------|---------|
| <b>Title and abstract</b> | 1       | (a) Indicate the study's design with a commonly used term in the title or the abstract                                                                                                                       | 2       |
|                           |         | (b) Provide in the abstract an informative and balanced summary of what was done and what was found                                                                                                          | 2       |
| <b>Introduction</b>       |         |                                                                                                                                                                                                              |         |
| Background/rationale      | 2       | Explain the scientific background and rationale for the investigation being reported                                                                                                                         | 3-4     |
| Objectives                | 3       | State specific objectives, including any prespecified hypotheses                                                                                                                                             | 4-5     |
| <b>Methods</b>            |         |                                                                                                                                                                                                              |         |
| Study design              | 4       | Present key elements of study design early in the paper                                                                                                                                                      | 5       |
| Setting                   | 5       | Describe the setting, locations, and relevant dates, including periods of recruitment, exposure, follow-up, and data collection                                                                              | 5       |
| Participants              | 6       | (a) Give the eligibility criteria, and the sources and methods of selection of participants                                                                                                                  | 5       |
| Variables                 | 7       | Clearly define all outcomes, exposures, predictors, potential confounders, and effect modifiers. Give diagnostic criteria, if applicable                                                                     | 5-6     |
| Data sources/measurement  | 8*      | For each variable of interest, give sources of data and details of methods of assessment (measurement). Describe comparability of assessment methods if there is more than one group                         | 5-6     |
| Bias                      | 9       | Describe any efforts to address potential sources of bias                                                                                                                                                    | 6       |
| Study size                | 10      | Explain how the study size was arrived at                                                                                                                                                                    | 5       |
| Quantitative variables    | 11      | Explain how quantitative variables were handled in the analyses. If applicable, describe which groupings were chosen and why                                                                                 | 5-6     |
| Statistical methods       | 12      | (a) Describe all statistical methods, including those used to control for confounding                                                                                                                        | 6       |
|                           |         | (b) Describe any methods used to examine subgroups and interactions                                                                                                                                          | NA      |
|                           |         | (c) Explain how missing data were addressed                                                                                                                                                                  | NA      |
|                           |         | (d) If applicable, describe analytical methods taking account of sampling strategy                                                                                                                           | NA      |
|                           |         | (e) Describe any sensitivity analyses                                                                                                                                                                        | NA      |
| <b>Results</b>            |         |                                                                                                                                                                                                              |         |
| Participants              | 13*     | (a) Report numbers of individuals at each stage of study—eg numbers potentially eligible, examined for eligibility, confirmed eligible, included in the study, completing follow-up, and analysed            | 7       |
|                           |         | (b) Give reasons for non-participation at each stage                                                                                                                                                         | 7       |
|                           |         | (c) Consider use of a flow diagram                                                                                                                                                                           | NA      |
| Descriptive data          | 14*     | (a) Give characteristics of study participants (eg demographic, clinical, social) and information on exposures and potential confounders                                                                     | 7       |
|                           |         | (b) Indicate number of participants with missing data for each variable of interest                                                                                                                          | NA      |
| Outcome data              | 15*     | Report numbers of outcome events or summary measures                                                                                                                                                         | 8       |
| Main results              | 16      | (a) Give unadjusted estimates and, if applicable, confounder-adjusted estimates and their precision (eg, 95% confidence interval). Make clear which confounders were adjusted for and why they were included | NA      |

|                          |    |                                                                                                                                                                            |      |
|--------------------------|----|----------------------------------------------------------------------------------------------------------------------------------------------------------------------------|------|
|                          |    | (b) Report category boundaries when continuous variables were categorized                                                                                                  | 8    |
|                          |    | (c) If relevant, consider translating estimates of relative risk into absolute risk for a meaningful time period                                                           | NA   |
| Other analyses           | 17 | Report other analyses done—eg analyses of subgroups and interactions, and sensitivity analyses                                                                             | NA   |
| <b>Discussion</b>        |    |                                                                                                                                                                            |      |
| Key results              | 18 | Summarise key results with reference to study objectives                                                                                                                   | 9-11 |
| Limitations              | 19 | Discuss limitations of the study, taking into account sources of potential bias or imprecision. Discuss both direction and magnitude of any potential bias                 | 11   |
| Interpretation           | 20 | Give a cautious overall interpretation of results considering objectives, limitations, multiplicity of analyses, results from similar studies, and other relevant evidence | 11   |
| Generalisability         | 21 | Discuss the generalisability (external validity) of the study results                                                                                                      | 11   |
| <b>Other information</b> |    |                                                                                                                                                                            |      |
| Funding                  | 22 | Give the source of funding and the role of the funders for the present study and, if applicable, for the original study on which the present article is based              | 12   |

\*Give information separately for exposed and unexposed groups.

**Note:** An Explanation and Elaboration article discusses each checklist item and gives methodological background and published examples of transparent reporting. The STROBE checklist is best used in conjunction with this article (freely available on the Web sites of PLoS Medicine at <http://www.plosmedicine.org/>, Annals of Internal Medicine at <http://www.annals.org/>, and Epidemiology at <http://www.epidem.com/>). Information on the STROBE Initiative is available at [www.strobe-statement.org](http://www.strobe-statement.org).



# BMJ Open

## Latent profile analysis of nurses' perceived professional benefits in China: a cross-sectional study

|                                 |                                                                                                                                                                                                                                                                                                                                                                                                               |
|---------------------------------|---------------------------------------------------------------------------------------------------------------------------------------------------------------------------------------------------------------------------------------------------------------------------------------------------------------------------------------------------------------------------------------------------------------|
| Journal:                        | <i>BMJ Open</i>                                                                                                                                                                                                                                                                                                                                                                                               |
| Manuscript ID                   | bmjopen-2023-078051.R3                                                                                                                                                                                                                                                                                                                                                                                        |
| Article Type:                   | Original research                                                                                                                                                                                                                                                                                                                                                                                             |
| Date Submitted by the Author:   | 16-Oct-2023                                                                                                                                                                                                                                                                                                                                                                                                   |
| Complete List of Authors:       | Sun, Changli; Third Affiliated Hospital of Zunyi Medical University<br>Jiang, Hu; Third Affiliated Hospital of Zunyi Medical University<br>Yao, Qingfang; The Third Affiliated Hospital of Zunyi Medical University<br>Wang, Xianwei; The Third Affiliated Hospital of Zunyi Medical University<br>Wen, Xueke; Third Affiliated Hospital of Zunyi Medical University<br>Liu, Hanmei; Zunyi Medical University |
| <b>Primary Subject Heading</b>: | Occupational and environmental medicine                                                                                                                                                                                                                                                                                                                                                                       |
| Secondary Subject Heading:      | Nursing, Occupational and environmental medicine                                                                                                                                                                                                                                                                                                                                                              |
| Keywords:                       | Burnout, Professional, Burnout, China                                                                                                                                                                                                                                                                                                                                                                         |
|                                 |                                                                                                                                                                                                                                                                                                                                                                                                               |

SCHOLARONE™  
Manuscripts



I, the Submitting Author has the right to grant and does grant on behalf of all authors of the Work (as defined in the below author licence), an exclusive licence and/or a non-exclusive licence for contributions from authors who are: i) UK Crown employees; ii) where BMJ has agreed a CC-BY licence shall apply, and/or iii) in accordance with the terms applicable for US Federal Government officers or employees acting as part of their official duties; on a worldwide, perpetual, irrevocable, royalty-free basis to BMJ Publishing Group Ltd ("BMJ") its licensees and where the relevant Journal is co-owned by BMJ to the co-owners of the Journal, to publish the Work in this journal and any other BMJ products and to exploit all rights, as set out in our [licence](#).

The Submitting Author accepts and understands that any supply made under these terms is made by BMJ to the Submitting Author unless you are acting as an employee on behalf of your employer or a postgraduate student of an affiliated institution which is paying any applicable article publishing charge ("APC") for Open Access articles. Where the Submitting Author wishes to make the Work available on an Open Access basis (and intends to pay the relevant APC), the terms of reuse of such Open Access shall be governed by a Creative Commons licence – details of these licences and which [Creative Commons](#) licence will apply to this Work are set out in our licence referred to above.

Other than as permitted in any relevant BMJ Author's Self Archiving Policies, I confirm this Work has not been accepted for publication elsewhere, is not being considered for publication elsewhere and does not duplicate material already published. I confirm all authors consent to publication of this Work and authorise the granting of this licence.

1  
2  
3  
4 **1 Latent profile analysis of nurses' perceived professional benefits in**  
5  
6 **2 China: a cross-sectional study**  
7  
8  
9 **3 Running Head: LPA of nurses' perceived professional benefits**  
10  
11  
12

13  
14 5 Changli Sun<sup>1</sup>, Hu Jiang<sup>1\*</sup>, Qingfang Yao<sup>2</sup>, Xianwei Wang<sup>2</sup>, Xueke Wen<sup>1</sup> and Hanmei  
15  
16 6 Liu<sup>2</sup>,

17  
18 7 <sup>1</sup> The Third Affiliated Hospital of Zunyi Medical University (The First People's Hospital of  
19  
20 8 Zunyi), Zunyi, Guizhou, China

21  
22 9 <sup>2</sup> Zunyi Medical University, Zunyi, Guizhou, China

23  
24 10 \*Correspondence: [jianghuchn@163.com](mailto:jianghuchn@163.com), Nursing Department, The Third Affiliated  
25  
26 11 Hospital of Zunyi Medical University (The First People's Hospital of Zunyi), Zunyi,  
27  
28 12 Guizhou, China

29  
30  
31  
32  
33  
34  
35  
36  
37  
38  
39  
40  
41  
42  
43  
44  
45  
46  
47  
48  
49  
50  
51  
52  
53  
54  
55  
56  
57  
58  
59  
60

13

1  
2  
3  
4 14 **Latent profile analysis of nurses' perceived professional benefits in**  
5  
6  
7 15 **China: a cross-sectional study**

8  
9 16 **ABSTRACT**

10 17 **Objective:** To identify profiles of nurses' perceived professional benefits as well as  
11  
12  
13 18 their predictors.

14  
15 19 **Design:** Cross-sectional study.

16  
17 20 **Setting:** The study was carried out online in China.

18  
19 21 **Methods:** From July 6 and July 27, 2022, a total of 1,309 registered nurses participated  
20  
21 22 in the survey by convenient sampling. We collected the Nurses' Perceived Professional  
22  
23 23 Benefits Questionnaire (NPPBQ) and demographic data. Using latent profile analysis  
24  
25 24 (LPA), subgroups of nurses' perceived professional benefits were identified. Moreover,  
26  
27 25 univariate and multinomial logistic regression analysis were conducted to find the  
28  
29 26 factors that were linked with the profiles.

30  
31 27 **Results:** The survey was validly completed by 1309 nurses, with a 92.9% effective  
32  
33 28 return rate. The findings of the LPA demonstrated three unique profiles: low perceived  
34  
35 29 professional benefits (11.8%), moderate perceived professional benefits (57.1%), and  
36  
37 30 high perceived professional benefits (31.1%). There was a correlation between marital  
38  
39 31 status, the number of night shifts per month, and leadership role.

40  
41 32 **Conclusions:** According to our research, registered nurses have three unique  
42  
43 33 professional benefit profiles. In order to sustain the nursing workforce, despite the fact  
44  
45 34 that nurses get a high level of professional benefits, interventions are necessary to  
46  
47 35 increase nurses' perception of their professional value.

48  
49  
50 37 **Keywords:** nurse, perceived professional benefits, latent profile analysis, cross-  
51  
52 38 sectional study

53  
54  
55 40 **Strengths and limitations of this study:**

56  
57 41 ● The LPA approach was utilized in this study to investigate heterogeneous  
58  
59  
60

- 1  
2  
3  
4 42 subgroups of nurses' perceived professional benefit.  
5  
6 43 ● This study identified three unique professional benefit profiles among Chinese  
7  
8 44 nurses.  
9  
10 45 ● Multivariate logistic regression analysis revealed only three contributing factors  
11  
12 46 associated to professional benefit profiles.  
13  
14 47 ● This study was limited by the web-based cross-sectional design and convenient  
15  
16 48 sampling method.  
17  
18 49

For peer review only

## 50 INTRODUCTION

51 Despite the fact that nursing is a high-risk, high-stress profession, nurses are able  
52 to achieve benefit findings [1-3]. In recent years, the concept of nurses' perceived  
53 professional benefits arises naturally, and has gradually attracted the attention of  
54 researchers. Nurses' perceived professional benefits (NPPB) refer to nurses'  
55 perceptions of the gains and benefits they receive in their profession during the hiring  
56 process, as well as their belief that working in nursing can promote their overall  
57 growth and development [4, 5]. Essentially, perceived professional benefits can be  
58 classified as an emotional experience and cognitive evaluation, which has two  
59 aspects: actual benefits and spiritual benefits [4]. However, there is a lack of in-depth  
60 research on the group heterogeneity of perceived professional benefits among nurse  
61 populations.

### 62 Background

63 It is estimated that 69% of the global health workforce consists of nurses [6].  
64 Yet, the present physical and mental health of nurses is not encouraging, as they  
65 confront high levels of stress, burnout, turnover, and their own ageing [7-9]. Nursing  
66 is no longer a desirable and appealing profession [10], which makes nurse shortages a  
67 widespread worldwide concern [11]. These issues have a direct bearing on the  
68 sustainability and continued growth of the nursing workforce. In recent years, nursing  
69 in China has experienced remarkable growth, and the most recent statistics indicate  
70 that China has more than 5 million registered nurses [12]. Chinese nurses are  
71 extremely susceptible to burnout, and a high desire to leave is a serious concern [13,  
72 14]. However, there is a dearth of comprehensive study and viable remedies.

73 The mental health of nurses is receiving increasing attention from managers and  
74 researchers in the context of positive psychology. It is beginning to be recognized that  
75 nurses' own positive psychology promotes job satisfaction and professional identity,  
76 lessens burnout, and hence reduces turnover rates [15, 16].

77 The profession of nursing can be beneficial to nurses in a number of ways.  
78 Previous studies [17, 18] reported that nursing preceptorship offers many benefits,

1  
2  
3  
4 79 and nurses may find themselves being more committed to the position as a result. A  
5  
6 80 qualitative study [19] found that nurses who were involved in caring for dying  
7  
8 81 patients got a great lot of experience and benefited considerably; they can create a  
9  
10 82 personal philosophy on death and life, in addition to professional growth. Nurses who  
11  
12 83 served as advanced practice nurse roles perceived numerous benefits, including  
13  
14 84 improved patient care quality and safety, professionalism, personal development,  
15  
16 85 career development, intrinsic satisfaction with the role, and impact on other  
17  
18 86 professional groups [20]. A person's perception of professional benefit is an  
19  
20 87 endogenous motivation for his or her development and has a positive effect on that  
21  
22 88 person's career. According to prior studies, improving the perceived professional  
23  
24 89 benefit of nurses reduces burnout reduction and enables nurses to approach their work  
25  
26 90 with a good attitude and obtain more favorable comments [21, 22].

27  
28  
29 91 Measures created by researchers to evaluate the perceived professional benefits  
30  
31 92 of nurses were still in little supply. The Preceptor's Perspective of Benefits and  
32  
33 93 Rewards (PPBR) measure was designed by Dibert, et al. [23] to evaluate the  
34  
35 94 perceived benefits of clinical preceptor nurses, however, it is not relevant to general  
36  
37 95 clinical nurses. A questionnaire entitled Nurses' Perceived Professional Benefits  
38  
39 96 Questionnaire (NPPBQ) was developed to assess how Chinese nurses perceive the  
40  
41 97 gains and benefits of their employment [5, 24]. This questionnaire has been utilized in  
42  
43 98 a lot of research to date. While we now have a better grasp of nurses' perceptions of  
44  
45 99 professional benefits, but the heterogeneity of the population is still lack, screening  
46  
47 100 strategies for future precision interventions cannot be developed for identifying low-  
48  
49 101 benefit populations.

50  
51 102 To our knowledge, it has not been shown that sufficient evidence exists to  
52  
53 103 answer the questions of whether nurses' perceived professional benefits differ in  
54  
55 104 groups and what factors contribute to these differences. The current study was created  
56  
57 105 to bridge that gap. This study's objective was to examine the characteristics and  
58  
59 106 determinants of nurses' perceived professional benefits as well as the predictors of  
60  
107 these latent profiles.

108

## 109 **MATERIALS AND METHODS**

### 110 **Study design**

111 An online survey with convenient sampling was used in this study to conduct a cross-  
112 sectional analysis. This study was designed and reported in accordance with the  
113 guidelines for Strengthening the Reporting of Observational Studies in Epidemiology  
114 (STROBE)[25].

115

### 116 **Sample size estimation**

117 An examination of the latent profiles of perceived professional benefits among  
118 nurses was conducted in this study. LPA needs a sample size larger than 500 [26, 27],  
119 therefore, the minimum sample size for this study was 500.

120

### 121 **Participants**

122 Participants in this study required to meet the inclusion criteria and be registered  
123 nurses. To be considered, candidates had to satisfy the following criteria to be  
124 considered: (1) having worked as a nurse in a medical facility, and (2) being willing to  
125 participate in this study. The following were the exclusion criteria: logical errors or  
126 missing information in questionnaire answers.

127

### 128 **Measurements**

#### 129 **Demographic**

130 This study gathered and evaluated demographic data including age, gender, greatest  
131 degree of education, marital status, and other participant characteristics.

132

#### 133 **Nurses' Perceived Professional Benefits Questionnaire (NPPBQ)**

134 The questionnaire was designed by Jing Hu, et al. [5] to investigate the gains and  
135 benefits that nurses perceived from their jobs. The authors then reduced it to 17 items  
136 by 2020 [24]. The questionnaire has five dimensions: personal growth, a good nurse-



1  
2  
3  
4 137 patient relationship, recognition from family and friends, a positive occupational  
5 138 perception, and team belonging. Items are scored on a 5-point Likert scale (1 =  
6  
7 139 strongly disagree, 2 = disagree, 3 = not sure, 4 = agree, 5 = strongly agree).  
8  
9 140 Cronbach's alphas for the questionnaires were 0.94, and the NPPBQ  
10  
11 141 subquestionnaires' alphas were 0.84, 0.83, 0.74, 0.79, and 0.85.  
12  
13  
14

### 15 143 **Data collection**

16  
17 144 During the dates of July 6 and July 27, 2022, data was gathered. Wenjuanxing  
18  
19 145 (www.wjx.cn) was used to develop a web-based questionnaire. Two researchers  
20  
21 146 reviewed the online questionnaire for rigor and verified the feasibility of the  
22  
23 147 questionnaire by completing it within the team. A poster was created to present the  
24  
25 148 link and QR code. It was clearly shown on the poster who would be included and  
26  
27 149 excluded from the survey. We distributed the questionnaire nationwide in China and  
28  
29 150 did not limit the source and setting of nurses. The researcher contacted administrators  
30  
31 151 or general nurses to disseminate the questionnaire. Wechat was used to send the  
32  
33 152 poster and information letter. The survey can be completed by clicking on the link or  
34  
35 153 scanning the QR code, completed questionnaires can be returned directly to the web.  
36  
37

### 38 155 **Statistical analyses**

39  
40 156 The use of latent profile analysis (LPA) is frequently used to determine the  
41  
42 157 number of subpopulations in a given sample. LPA is a statistical method that use  
43  
44 158 potential category variables to explain the link between exogenous continuous-type  
45  
46 159 indicators, permitting the assessment of the correlation between exogenous indicators  
47  
48 160 and the maintenance of local independence among exogenous indicators [27]. Latent  
49  
50 161 profile analysis was conducted using Mplus 7.4 software. Log likelihood (LL),  
51  
52 162 Akaike information criterion (AIC), Akaike Information Criterion (BIC), Adjusted  
53  
54 163 Bayesian Information Criteria (aBIC), Entropy, Lo-Mendell-Rubin (LMR), and the  
55  
56 164 Bootstrapped Likelihood Ratio Test (BLRT) were used to assess model fit and  
57  
58 165 determine the appropriate number of categories. In order to decide which model best  
59  
60

1  
2  
3  
4 166 fit the data, the models from each category's fitting results were combined with the  
5  
6 167 aforementioned indicators. The data was examined using the SPSS 26.0 statistical  
7  
8 168 program. We utilized frequency and composition ratios for categorical data, whereas  
9  
10 169 mean and standard deviation were utilized for continuous variables. The chi-square  
11  
12 170 test was performed to compare category variables across groups. ANOVA was used  
13  
14 171 to compare continuous variables among multiple groups. A multivariate logistic  
15  
16 172 regression model was employed to analyze the variations in demographic variables. A  
17  
18 173 statistically significant difference was indicated by  $p < 0.05$ .

174

### 175 **Ethical considerations**

176 The Ethics Committee of the First People's Hospital of Zunyi (2022-016) approved  
177 the study, and participants gave permission for data collection. Prior to completing the  
178 survey, participants will be provided with information about the purpose of the study  
179 and the major substance of the research. They will then be able to provide their  
180 informed consent through a yes or no response. In addition, participants were also  
181 informed that the study's findings would be given in aggregate form and that no  
182 participant could be identified. If a person declined to complete the questionnaire, the  
183 collection was immediately ended.

184

### 185 **Patient and public involvement**

186 Patients and/or the public were not involved in the design, or conduct, or reporting, or  
187 dissemination plans of this research.

188

## 189 **RESULTS**

### 190 **Participant characteristics**

191 A total of 1409 nurses completed the questionnaire, while 58 nurses denied  
192 participation, for a total number of 1351 questionnaires received. 42 surveys were  
193 considered invalid due to insufficient or inaccurate information. 92.9 percent of the  
194 final 1309 surveys were correctly returned. The ages of the participants varied from 18

195 to 59 years old, with a mean age of 32.25 (SD: 6.18) years old. The bulk of participants  
196 were female (86.7%), whereas the minority were male (3.2%).

197

### 198 **Characteristics of the different classes**

199 On the basis of the NPPBQ's five dimensions, it was established that a model with three  
200 latent classes provided the greatest match. A class represents different categorisation  
201 methods, such as a class 1 for a single subgroup, a class 2 for two heterogeneous  
202 subgroups, and so forth. Table 1 provides the results. While the AIC and BIC in class  
203 4 were lower in class 4 than in class 3, the entropy was greater; nonetheless, the lowest  
204 category probability in class 4 was 1.4%, which is unsatisfactory. As a consequence,  
205 we decided that the best-fitting model is class 3. Using a three-class model, Figure 1  
206 illustrates the mean scores for each category within the NPPBQ's dimensions. The  
207 percentages increase from class 1 to class 3 as follows: 11.8% (155 nurses), 57.1% (747  
208 nurses), and 31.1% (407 nurses). For the sake of brevity, based on the profile scores,  
209 we named class 1 as the low perceived professional benefits, class 2 as the moderate  
210 perceived professional benefits, and class 3 as the high perceived professional benefits.

211 **Table 1** Potential profile analysis indicators ( $N=1309$ )

| Model   | LL <sup>a</sup> | AIC <sup>b</sup> | BIC <sup>c</sup> | aBIC <sup>d</sup> | Entropy | LMR <sup>e</sup><br><i>p</i> -value | BLRT <sup>f</sup><br><i>p</i> -value | Category probability    |
|---------|-----------------|------------------|------------------|-------------------|---------|-------------------------------------|--------------------------------------|-------------------------|
| Class 1 | -<br>14709.353  | 29438.706        | 29490.476        | 29458.711         | -       | -                                   | -                                    | -                       |
| Class 2 | -<br>13420.425  | 26872.850        | 26955.682        | 26904.857         | 0.905   | <<br>0.001                          | < 0.001                              | 0.654/0.346             |
| Class 3 | -<br>12583.629  | 25211.257        | 25325.152        | 25255.268         | 0.936   | 0.007                               | < 0.001                              | 0.118/0.571/0.311       |
| Class 4 | -<br>12307.807  | 24671.613        | 24816.570        | 24727.627         | 0.940   | 0.036                               | < 0.001                              | 0.151/0.014/0.530/0.306 |

212

213 a Log likelihood, b Akaike information criterion, c Bayesian information criterion, d Adjusted  
214 bayesian information criterion, e Lo-Mendell-Rubin Likelihood Ratio Test, f Bootstrapped  
215 Likelihood Ratio Test

216

1  
2  
3  
4 217 **The scale and dimension scores of different profiles**

5 218 The findings of a one-way ANOVA indicated statistically significant differences in the  
6  
7 219 scale and dimension scores of different profiles (both  $p < 0.001$ ). The results were shown  
8  
9 220 in Figure 2 demonstrates the outcomes.  
10

11 221

12  
13 222 **Demographic and related characteristics of each profile**

14  
15 223 The ANOVA and chi-square tests indicated statistically significant differences  
16  
17 224 between the three profiles differed statistically in terms of age, marital status, children,  
18  
19 225 professional title, leadership role, working years, and number of night shifts per month.  
20

21 226 Table 2 is a summary of the results.  
22

23 227 **Table 2** Demographic and characteristics by latent profile ( $N=1309$ )

| Variables                | Class 1      | Class 2         | Class 3      | $\chi^2/F$ | $p$     |
|--------------------------|--------------|-----------------|--------------|------------|---------|
| Age (SD)                 | 30.94 (5.37) | 31.76<br>(5.91) | 33.64 (6.71) | 16.545     | < 0.001 |
| Gender                   |              |                 |              | 0.600      | 0.741   |
| Male                     | 6 (3.9)      | 25 (3.3)        | 11 (2.7)     |            |         |
| Female                   | 149 (96.1)   | 722 (96.7)      | 396 (97.3)   |            |         |
| Highest Degree           |              |                 |              | 1.602      | 0.449   |
| Junior college and below | 29 (18.7)    | 111 (14.9)      | 60 (14.7)    |            |         |
| Bachelor's and above     | 126 (81.3)   | 636 (85.1)      | 347 (85.3)   |            |         |
| Marital status           |              |                 |              | 25.768     | < 0.001 |
| Single/divorced/widowed  | 62 (40.0)    | 218 (29.2)      | 80 (19.7)    |            |         |
| Married                  | 93 (60.0)    | 529 (70.8)      | 327 (80.3)   |            |         |
| Children                 |              |                 |              | 26.943     | < 0.001 |
| Yes                      | 87 (56.1)    | 481 (64.4)      | 311 (76.4)   |            |         |
| No                       | 68 (43.9)    | 266 (35.6)      | 96 (23.6)    |            |         |
| Professional title       |              |                 |              | 23.589     | < 0.001 |

|                                  |            |            |            |        |         |
|----------------------------------|------------|------------|------------|--------|---------|
| Junior Level                     | 102 (65.8) | 448 (60.0) | 207 (50.9) |        |         |
| Intermediate level               | 50 (32.3)  | 280 (37.5) | 172 (42.3) |        |         |
| Senior level                     | 3 (1.9)    | 19 (2.5)   | 28 (6.9)   |        |         |
| Leadership role                  |            |            |            | 17.086 | < 0.001 |
| Yes                              | 18 (11.6)  | 86 (11.5)  | 82 (20.1)  |        |         |
| No                               | 137 (88.4) | 661 (88.5) | 325 (79.9) |        |         |
| Working years (years)            |            |            |            | 32.903 | < 0.001 |
| ≤5                               | 52 (33.5)  | 217 (29.0) | 79 (19.4)  |        |         |
| 6–15                             | 91 (58.7)  | 438 (58.6) | 241 (59.2) |        |         |
| ≥16                              | 12 (7.7)   | 92 (12.3)  | 87 (21.4)  |        |         |
| Average monthly income (yuan)*   |            |            |            | 7.990  | 0.239   |
| ≤3000                            | 23 (14.8)  | 75 (10.0)  | 43 (10.6)  |        |         |
| 3001~6000                        | 93 (60.0)  | 415 (55.6) | 217 (53.3) |        |         |
| 6001~9000                        | 27 (17.4)  | 179 (24.0) | 105 (25.8) |        |         |
| ≥9001                            | 12 (7.7)   | 78 (10.4)  | 42 (10.3)  |        |         |
| Number of night shifts per month |            |            |            | 17.797 | 0.001   |
| 0                                | 42 (27.1)  | 233 (31.2) | 164 (40.3) |        |         |
| 1–4                              | 22 (14.2)  | 143 (19.1) | 73 (17.9)  |        |         |
| ≥5                               | 91 (58.7)  | 371 (49.7) | 170 (41.8) |        |         |

228

229 \* 1 USD equals 7.31 Chinese Yuan, exchange rate on September 29, 2023

230

231 A multivariate logistic regression model was constructed using the variables with  
 232 statistically significant differences as determined by ANOVA and chi-square tests. Of  
 233 the three profiles, the class 3 was chosen as a reference to find the predictors linked  
 234 with NPPBQ. As shown in Table 3, nurses who were single/divorced/widowed were

235 more likely to belonged to low perceived professional benefits (*OR*: 1.984,  
 236 95%*CI*:1.028-3.828). The number of night shifts worked per month was associated with  
 237 low perceived professional benefits (*OR*: 0.633, 95% *CI*: 0.405-0.988), compared to  
 238 those with more than five night shifts, those without night shifts tended to fall into the  
 239 high perceived professional benefits. Nurses without a leadership role were more likely  
 240 to be in the moderate perceived professional benefits (*OR*: 1.489, 95% *CI*: 1.028-2.157).  
 241 Other variables were not statistically significant in the multivariate logistic regression.

242

243

244

245

246

**Table 3** Predictors of latent profile membership

| Variables               | Class 1 VS Class 3 |           |               | Class 2 VS Class 3 |           |               |
|-------------------------|--------------------|-----------|---------------|--------------------|-----------|---------------|
|                         | $\beta$            | <i>OR</i> | 95% <i>CI</i> | $\beta$            | <i>OR</i> | 95% <i>CI</i> |
| Age (SD)                | 0.004              | 1.004     | 0.941-1.070   | -0.005             | 0.995     | 0.957-1.034   |
| Marital status          |                    |           |               |                    |           |               |
| Single/divorced/widowed | 0.685              | 1.984*    | 1.028-3.828   | 0.115              | 1.122     | 0.716-1.760   |
| Married (Ref)           |                    |           |               |                    |           |               |
| Children                |                    |           |               |                    |           |               |
| No                      | 0.177              | 1.194     | 0.622-2.293   | 0.240              | 1.272     | 0.822-1.967   |
| Yes (Ref)               |                    |           |               |                    |           |               |
| Professional title      |                    |           |               |                    |           |               |
| Junior level            | 0.368              | 1.444     | 0.334-6.241   | 0.359              | 1.433     | 0.661-3.105   |
| Intermediate level      | 0.378              | 1.460     | 0.370-5.766   | 0.429              | 1.535     | 0.764-3.085   |
| Senior level (Ref)      |                    |           |               |                    |           |               |
| Leadership role         |                    |           |               |                    |           |               |
| No                      | 0.139              | 1.984     | 1.028-3.828   | 0.398              | 1.489*    | 1.028-2.157   |
| Yes (Ref)               |                    |           |               |                    |           |               |
| Working years (years)   |                    |           |               |                    |           |               |

|    |                            |        |        |             |        |       |             |
|----|----------------------------|--------|--------|-------------|--------|-------|-------------|
| 1  |                            |        |        |             |        |       |             |
| 2  |                            |        |        |             |        |       |             |
| 3  |                            |        |        |             |        |       |             |
| 4  | ≤5                         | 0.781  | 2.184  | 0.666-7.161 | 0.411  | 1.508 | 0.748-3.042 |
| 5  |                            |        |        |             |        |       |             |
| 6  | 6-15                       | 0.721  | 2.057  | 0.847-5.000 | 0.228  | 1.256 | 0.773-2.039 |
| 7  |                            |        |        |             |        |       |             |
| 8  | ≥16 (Ref)                  |        |        |             |        |       |             |
| 9  | Number of night shifts per |        |        |             |        |       |             |
| 10 | month                      |        |        |             |        |       |             |
| 11 |                            |        |        |             |        |       |             |
| 12 | 0                          | -0.458 | 0.633* | 0.405-0.988 | -0.223 | 0.800 | 0.601-1.064 |
| 13 |                            |        |        |             |        |       |             |
| 14 | 1-4                        | -0.354 | 0.702  | 0.400-1.231 | 0.089  | 1.094 | 0.768-1.558 |
| 15 |                            |        |        |             |        |       |             |
| 16 | ≥5 (Ref)                   |        |        |             |        |       |             |

247 \* $p < 0.05$ ; OR, Odds ratio; 95% CI, 95% Confidence Interval; Ref, Reference.

## 248 **DISCUSSION**

249 The purpose of this research was to identify distinct profiles of nurses' perceived  
250 professional benefits. Furthermore, the current study employed multinomial logistic  
251 regression to investigate predictors of these profiles.

252 In this study, we investigated 1309 nurses who validly completed the questionnaire.  
253 As a result, three latent profiles were identified: low perceived professional benefits,  
254 moderate perceived professional benefits, and high perceived professional benefits. Our  
255 research revealed that the majority of nurses had a moderate or higher levels of  
256 perceived professional benefits, with just 11.8% of nurses belonging to the category of  
257 nurses with low perceived professional benefits. Most studies reported nurses had an  
258 upper-moderate level of perceived professional benefits [28, 29], and our findings are  
259 consistent with those of previous studies. Most importantly, our study clarified the  
260 heterogeneous subgroups of nurses' perceived professional benefits and their specific  
261 distribution.

262 In the last three years, nurses have been a key part of the fight against the COVID-  
263 19 outbreak. Despite heavy job pressure, nurses have had a feeling of professional  
264 calling and value [30], which has effectively enhanced their sense of professional  
265 benefit [1]. At the same time, the critical role of nurses in defending people's lives and  
266 health has earned the society's respect and recognition, as well as a positive social image  
267 [31, 32], which can further enhance nurses' sense of professional benefit. Our survey  
268 was conducted during the COVID-19 epidemic, and nurses' perceptions of professional  
269 benefit may be elevated.

270 Another finding of our study revealed that the membership of profiles can be  
271 predicted by some characteristics such as the number of night shifts, leadership role,  
272 and marriage status. Nursing is a continuous, 24-hour profession, and nurse's work  
273 normally takes the form of night shifts. It is widely proven that night shifts negatively  
274 impact the physical and emotional health of nurses [33-36]. Nurses working rotating  
275 night shifts were normally younger, and they had the lower scores of job satisfaction,  
276 quality of sleep, and quantity of sleep [37], these factors resulted in a low perceived



1  
2  
3  
4 277 professional benefits. Consistent with past research, our findings indicate that the  
5  
6 278 greater the frequency of night shifts, the lower the perceived professional benefit [29].

7  
8 279 According to our results, 57.1% of nurses perceived professional benefits as  
9  
10 280 moderate. The majority of nurses in the moderate perceived professional benefits  
11  
12 281 group lacked a work title, while the majority of nurses in the highly perceived  
13  
14 282 professional benefits group held a leadership role. This has been validated by other  
15  
16 283 research, and our work provides more support for this notion [29]. Holding a  
17  
18 284 managerial position at a hospital is a means of advancing one's career, and nurses  
19  
20 285 highly value this opportunity.

21 286 Our study found that nurses who were single/divorced/widowed were more likely  
22  
23 287 to belong to low perceived professional benefits, which is consistent with earlier  
24  
25 288 findings [29]. This may be because, unlike single/divorced/widowed nurses, married  
26  
27 289 nurses receive more social support from their spouses and other family members.

28  
29 290 We hypothesized that job fulfillment and social support are important influencing  
30  
31 291 mechanisms that affect nurses' perceived professional benefits. The number of night  
32  
33 292 shifts, leadership roles are important indicators of nurses' job fulfillment. Marital status  
34  
35 293 is an important factor in social support. Each of these factors can have varying degrees  
36  
37 294 of impact on the actual benefit or spiritual benefit [4]. Considering that nurses perceive  
38  
39 295 professional benefits as a result of personal, organizational, environmental, and social  
40  
41 296 factors, a well-developed theoretical framework is required to explain this phenomenon.

42  
43 297 Unfortunately, our research failed to demonstrate that the profiles can be predicted  
44  
45 298 by other factors in the model variables. Our findings in the univariate analysis results  
46  
47 299 were consistent with earlier research. Nevertheless, because the bulk of prior research  
48  
49 300 did not employ multi-factor models, it was impossible to compare our findings could  
50  
51 301 not be compared to those of others. In addition, certain putative contributing elements  
52  
53 302 were not adequately proven, and further research is required to confirm them in the  
54  
55 303 future.

56 304 Our research has theoretical and practical implications for the future study of  
57  
58 305 nurses' perceived professional benefits. First, the number of night shifts, leadership

1  
2  
3  
4 306 role, and marriage status are the most significant factors affecting nurses' perceived  
5  
6 307 professional benefits, and in the future, we should focus on the degree of influence of  
7  
8 308 these three factors and explore the mechanisms from the theoretical level. Second,  
9  
10 309 managers should pay active attention to the perceived professional benefits of clinical  
11  
12 310 nurses, create a favorable working environment and professional growth atmosphere,  
13  
14 311 and promote the professional success of nurses. Given that 11.8% of nurses still have  
15  
16 312 a low perceived sense of career benefit, more tailored intervention programs are still  
17  
18 313 needed in the future.

19 314

### 20 315 **Strengths and limitations**

21 316 To the best of our knowledge, this is the first study to use the LPA approach to explore  
22  
23 317 heterogeneous subgroups of nurses' perceived professional benefit with a large sample  
24  
25 318 size, and we presented a unique perspective and a basis for future research on the  
26  
27 319 perceived career benefits of nurses. The research was limited in some ways. First, this  
28  
29 320 was a web-based survey, and the sample process and self-reporting strategy may have  
30  
31 321 resulted in some bias. Second, we only polled nurses in mainland China, and our sample  
32  
33 322 only reflected the current situation in a single nation. Lastly, the constraints of the  
34  
35 323 study's design prohibited an in-depth assessment of the psychological factors behind  
36  
37 324 nurses' perceptions of their professional benefit. As a result, more rigorously designed  
38  
39 325 studies will be required in the future to investigate this issue in depth.

40 326

### 41 327 **CONCLUSION**

42 328 Our study identified three professional benefits profiles among nurses. The results of  
43  
44 329 our study indicated that nurses enjoy a high level of professional benefits.

45 330 Notwithstanding the study's limitations of the study and the present condition of  
46  
47 331 nursing, it is vital that we engage on several levels to encourage a stable nursing  
48  
49 332 workforce, including policy, organisation, financial income, and career development,  
50  
51 333 so that nurses experience a sense of professional gain.

52 334

1  
2  
3  
4 335 **Acknowledgements**

5 336 None.

6  
7 337 **AUTHOR CONTRIBUTIONS**

8  
9 338 Jiang Hu and Sun Changli were responsible for the conception and study design. Yao

10 339 Qiangfang, Wang Xianwei and Liu Hanmei performed the data collection. Yao

11 340 Qiangfang, Wang Xianwei and Wen Xueke contributed to the analysis of the data.

12 341 Sun Changli and Jiang Hu were involved in drafting the manuscript and revising it.

13 342 All authors have read and approved the final manuscript.

14 343 **FUNDING**

15 344 This study was funded by the Science and Technology Joint Funds of Zunyi Science

16 345 and Technology Bureau (2023-73).

17 346 **CONFLICT OF INTEREST**

18 347 The authors have no conflicts of interest to declare.

19 348 **Ethics approval**

20 349 This study involves human participants and was approved by the Ethics Committee of

21 350 the First People's Hospital of Zunyi (2022-016). Participants gave informed consent to

22 351 participate in the study before taking part.

23 352 **Data availability statement**

24 353 Data are available upon reasonable request. Data are available from the corresponding

25 354 author and the first author on reasonable request.

26 355

356 **REFERENCES**

- 357 1. Wang X, Chen F, Dai P, Lin X, Qi L: **Perceived professional benefits and associated**  
358 **factors among nurses during the COVID-19 pandemic: A cross-sectional study.** *Nurs*  
359 *Open* 2023, **10**(3):1461-1470.
- 360 2. Jiang H, Huang N, Tian W, Shi S, Yang G, Pu H: **Factors Associated With Post-**  
361 **traumatic Stress Disorder Among Nurses During COVID-19.** *Front Psychol* 2022,  
362 **13**:745158.
- 363 3. Liu S, Duan X, Han P, Shao H, Jiang J, Zeng L: **Occupational benefit perception of**  
364 **acute and critical care nurses: A qualitative meta-synthesis.** *Front Public Health* 2022,  
365 **10**:976146.
- 366 4. Zhou H, Zhu Y, Zhang X, Peng J, Li Q, Wang X, Wang L, Cai X, Lan L: **Psychological**  
367 **Capital and Perceived Professional Benefits: Testing the Mediating Role of Perceived**  
368 **Nursing Work Environment Among Chinese Nurses.** *J Psychosoc Nurs Ment Health*  
369 *Serv* 2018, **56**(4):38-47.
- 370 5. Hu J, Liu X: **The preparation of nurses' occupational benefit questionnaire and its**  
371 **reliability and validity test [J].** *J Chin People's Liberation Army* 2013, **30**(22):1-5.
- 372 6. Malone B: **A Perspective on the State of the World's Nursing Report.** *Nurs Adm Q* 2021,  
373 **45**(1):6-12.
- 374 7. Ivziku D, de Maria M, Ferramosca FMP, Greco A, Tartaglini D, Gualandi R: **What**  
375 **determines physical, mental and emotional workloads on nurses? A cross-sectional**  
376 **study.** *J Nurs Manag* 2022, **30**(8):4387-4397.
- 377 8. Morgan B, Jordan L, Rivera LA: **Considerations for an aging nurse anesthetists**

- 1  
2  
3  
4 378 workforce. *Geriatr Nurs* 2020, **41**(6):1017-1019.
- 5  
6 379 9. Tamata AT, Mohammadnezhad M: **A systematic review study on the factors affecting**  
7  
8  
9 380 **shortage of nursing workforce in the hospitals.** *Nurs Open* 2023, **10**(3):1247-1257.
- 10  
11 381 10. van der Cingel M, Brouwer J: **What makes a nurse today? A debate on the nursing**  
12  
13 382 **professional identity and its need for change.** *Nurs Philos* 2021, **22**(2):e12343.
- 14  
15  
16 383 11. Udod S: **A Call for Urgent Action: Innovations for Nurse Retention in Addressing the**  
17  
18 384 **Nursing Shortage.** *Nurs Rep* 2023, **13**(1):145-147.
- 19  
20 385 12. **China Statistical Yearbook** [<http://www.stats.gov.cn/sj/ndsj/2022/indexch.htm>]  
21  
22  
23  
24 386 13. Zeng LN, Zhang JW, Zong QQ, Chan SW, Browne G, Ungvari GS, Chen LG, Xiang  
25  
26 387 **YT: Prevalence of burnout in mental health nurses in China: A meta-analysis of**  
27  
28 388 **observational studies.** *Arch Psychiatr Nurs* 2020, **34**(3):141-148.
- 29  
30 389 14. Chen JP, Dai YM, Qin Y, Liang SP, Cheng G, Liu Y, Yang CZ, He HG, Shen Q: **Factors**  
31  
32 390 **influencing turnover intention among male nurses in China: A large-scale descriptive**  
33  
34 391 **correlational study.** *Int Nurs Rev* 2023.
- 35  
36  
37 392 15. Yu JF, Ding YM, Jia RY, Liang DD, Wu Z, Lu GL, Chen CR: **Professional identity and**  
38  
39 393 **emotional labour affect the relationship between perceived organisational justice and**  
40  
41 394 **job performance among Chinese hospital nurses.** *J Nurs Manag* 2022, **30**(5):1252-  
42  
43 395 1262.
- 44  
45  
46 396 16. Lin L, Liu X, He G: **Mindfulness and Job Satisfaction Among Hospital Nurses: The**  
47  
48 397 **Mediating Roles of Positive Affect and Resilience.** *J Psychosoc Nurs Ment Health Serv*  
49  
50 398 2020, **58**(6):46-55.
- 51  
52  
53 399 17. Macey A, Green C, Jarden RJ: **ICU nurse preceptors' perceptions of benefits, rewards,**  
54  
55  
56  
57  
58  
59  
60

- 1  
2  
3  
4 400 **supports and commitment to the preceptor role: A mixed-methods study.** *Nurse Educ*  
5  
6 401 *Pract* 2021, **51**:102995.  
7  
8  
9 402 18. Natan MB, Qeadan H, Egbaria W: **The commitment of Israeli nursing preceptors to the**  
10  
11 403 **role of preceptor.** *Nurse Educ Today* 2014, **34**(12):1425-1429.  
12  
13  
14 404 19. Zheng RS, Guo QH, Dong FQ, Owens RG: **Chinese oncology nurses' experience on**  
15  
16 **caring for dying patients who are on their final days: a qualitative study.** *Int J Nurs Stud*  
17 405  
18 2015, **52**(1):288-296.  
19 406  
20  
21 407 20. Christiansen A, Vernon V, Jinks A: **Perceptions of the benefits and challenges of the**  
22  
23 **role of advanced practice nurses in nurse-led out-of-hours care in Hong Kong: a**  
24 408  
25 **questionnaire study.** *J Clin Nurs* 2013, **22**(7-8):1173-1181.  
26 409  
27  
28 410 21. Wu B, Zhao Y, Xu D, Wang Y, Niu N, Zhang M, Zhi X, Zhu P, Meng A: **Factors**  
29 411  
30 **associated with nurses' willingness to participate in care of patients with COVID-19: A**  
31  
32 **survey in China.** *J Nurs Manag* 2020, **28**(7):1704-1712.  
33 412  
34  
35 413 22. Liu X, Ju X, Liu X: **The relationship between resilience and intent to stay among**  
36 414  
37 **Chinese nurses to support Wuhan in managing COVID-19: The serial mediation effect**  
38 415  
39 **of post-traumatic growth and perceived professional benefits.** *Nurs Open* 2021,  
40 416  
41 **8**(5):2866-2876.  
42  
43 417 23. Dibert C, Goldenberg D: **Preceptors' perceptions of benefits, rewards, supports and**  
44 418  
45 **commitment to the preceptor role.** *J Adv Nurs* 1995, **21**(6):1144-1151.  
46 419  
47  
48 419 24. Hu Y, Hu J, Li L, Zhao B, Liu X, Li F: **Development and preliminary validation of a brief**  
49 420  
50 **nurses' perceived professional benefit questionnaire (NPPBQ).** *BMC Med Res*  
51 421  
52 *Methodol* 2020, **20**(1):18.  
53  
54  
55  
56  
57  
58  
59  
60

- 1  
2  
3  
4 422 25. von Elm E, Altman DG, Egger M, Pocock SJ, Gøtzsche PC, Vandenbroucke JP: **The**  
5  
6 423 **Strengthening the Reporting of Observational Studies in Epidemiology (STROBE)**  
7  
8  
9 424 **Statement: guidelines for reporting observational studies.** *Int J Surg* 2014, **12**(12):1495-  
10  
11 425 1499.
- 12  
13  
14 426 26. Nylund KL, Asparouhov T, Muthén BO: **Deciding on the number of classes in latent**  
15  
16  
17 427 **class analysis and growth mixture modeling: A Monte Carlo simulation study.** *Structural*  
18  
19 428 *equation modeling: A multidisciplinary Journal* 2007, **14**(4):535-569.
- 20  
21  
22 429 27. Spurk D, Hirschi A, Wang M, Valero D, Kauffeld S: **Latent profile analysis: A review**  
23  
24 430 **and "how to" guide of its application within vocational behavior research.** *Journal of*  
25  
26 431 *vocational behavior* 2020, **120**:103445.
- 27  
28  
29 432 28. Ma HW, Dan X, Xu SH, Hou RN, Zhao NM: **[Current status of nurses' perceived**  
30  
31 433 **professional benefits and influencing factors in 3A-level hospitals in Tianjin].** *Zhonghua*  
32  
33 434 *Lao Dong Wei Sheng Zhi Ye Bing Za Zhi* 2017, **35**(6):443-447.
- 34  
35  
36 435 29. Zhan T, Li H, Ding X: **Can social support enhance sense of coherence and perceived**  
37  
38 436 **professional benefits among Chinese registered nurses? A mediation model.** *J Nurs*  
39  
40 437 *Manag* 2020, **28**(3):488-494.
- 41  
42  
43 438 30. Savitsky B, Radomislensky I, Hendel T: **Nurses' occupational satisfaction during Covid-**  
44  
45 439 **19 pandemic.** *Appl Nurs Res* 2021, **59**:151416.
- 46  
47  
48 440 31. Mohammed S, Peter E, Killackey T, Maciver J: **The "nurse as hero" discourse in the**  
49  
50 441 **COVID-19 pandemic: A poststructural discourse analysis.** *Int J Nurs Stud* 2021,  
51  
52 442 **117**:103887.
- 53  
54  
55 443 32. Begnini D, Cicolella DA, Freitas KR, Maranhão T, Rocha CMF, Kruse MHL: **Heroines**  
56  
57  
58  
59  
60

- 1  
2  
3  
4 444 in Covid-19 times: visibility of nursing in the pandemic. *Rev Gaucha Enferm* 2021,  
5  
6 445 42(spe):e20200373.  
7  
8  
9 446 33. James L, Elkins-Brown N, Wilson M, James SM, Dotson E, Edwards CD, Wintersteen-  
10  
11 447 Arleth L, Stevens K, Butterfield P: **The effects of three consecutive 12-hour shifts on**  
12  
13 448 **cognition, sleepiness, and domains of nursing performance in day and night shift**  
14  
15 449 **nurses: A quasi-experimental study.** *Int J Nurs Stud* 2021, 123:104041.  
16  
17  
18  
19 450 34. Weaver SH, de Cordova PB, Vitale TR, Hargwood P, Salmond S: **Experiences and**  
20  
21 451 **perceptions of nurses working night shift: a qualitative systematic review.** *JBI Evid*  
22  
23 452 *Synth* 2023, 21(1):33-97.  
24  
25  
26  
27 453 35. Borroni E, Frigerio G, Polledri E, Mercadante R, Maggioni C, Fedrizzi L, Pesatori AC,  
28  
29 454 Fustinoni S, Carugno M: **Metabolomic profiles in night shift workers: A cross-sectional**  
30  
31 455 **study on hospital female nurses.** *Front Public Health* 2023, 11:1082074.  
32  
33  
34  
35 456 36. Jørgensen JT, Rozing MP, Westendorp RGJ, Hansen J, Stayner LT, Simonsen MK,  
36  
37 457 Andersen ZJ: **Shift work and incidence of psychiatric disorders: The Danish Nurse**  
38  
39 458 **Cohort study.** *J Psychiatr Res* 2021, 139:132-138.  
40  
41  
42  
43 459 37. Ferri P, Guadi M, Marcheselli L, Balduzzi S, Magnani D, Di Lorenzo R: **The impact of**  
44  
45 460 **shift work on the psychological and physical health of nurses in a general hospital: a**  
46  
47 461 **comparison between rotating night shifts and day shifts.** *Risk Manag Healthc Policy*  
48  
49 462 2016, 9:203-211.  
50  
51  
52  
53 463  
54 464  
55  
56  
57  
58  
59  
60



1  
2  
3  
4 465 **Figure 1** Latent profiles of NPPBQ

5  
6 466

7 467 **Figure 2** The scale and dimension scores of different profiles

8  
9 468

10  
11 469

12  
13  
14  
15  
16  
17  
18  
19  
20  
21  
22  
23  
24  
25  
26  
27  
28  
29  
30  
31  
32  
33  
34  
35  
36  
37  
38  
39  
40  
41  
42  
43  
44  
45  
46  
47  
48  
49  
50  
51  
52  
53  
54  
55  
56  
57  
58  
59  
60

For peer review only

1  
2  
3  
4  
5  
6  
7  
8  
9  
10  
11  
12  
13  
14  
15  
16  
17  
18  
19  
20  
21  
22  
23  
24  
25  
26  
27  
28  
29  
30  
31  
32  
33  
34  
35  
36  
37  
38  
39  
40  
41  
42  
43  
44  
45  
46  
47  
48  
49  
50  
51  
52  
53  
54  
55  
56  
57  
58  
59  
60



Latent profiles of NPPBQ  
145x76mm (300 x 300 DPI)

1  
2  
3  
4  
5  
6  
7  
8  
9  
10  
11  
12  
13  
14  
15  
16  
17  
18  
19  
20  
21  
22  
23  
24  
25  
26  
27  
28  
29  
30  
31  
32  
33  
34  
35  
36  
37  
38  
39  
40  
41  
42  
43  
44  
45  
46  
47  
48  
49  
50  
51  
52  
53  
54  
55  
56  
57  
58  
59  
60



The scale and dimension scores of different profiles

145x114mm (300 x 300 DPI)

STROBE Statement—Checklist of items that should be included in reports of *cross-sectional studies*

|                              | Item No | Recommendation                                                                                                                                                                                               | Page No |
|------------------------------|---------|--------------------------------------------------------------------------------------------------------------------------------------------------------------------------------------------------------------|---------|
| <b>Title and abstract</b>    | 1       | (a) Indicate the study's design with a commonly used term in the title or the abstract                                                                                                                       | 2       |
|                              |         | (b) Provide in the abstract an informative and balanced summary of what was done and what was found                                                                                                          | 2       |
| <b>Introduction</b>          |         |                                                                                                                                                                                                              |         |
| Background/rationale         | 2       | Explain the scientific background and rationale for the investigation being reported                                                                                                                         | 3-4     |
| Objectives                   | 3       | State specific objectives, including any prespecified hypotheses                                                                                                                                             | 4-5     |
| <b>Methods</b>               |         |                                                                                                                                                                                                              |         |
| Study design                 | 4       | Present key elements of study design early in the paper                                                                                                                                                      | 5       |
| Setting                      | 5       | Describe the setting, locations, and relevant dates, including periods of recruitment, exposure, follow-up, and data collection                                                                              | 5       |
| Participants                 | 6       | (a) Give the eligibility criteria, and the sources and methods of selection of participants                                                                                                                  | 5       |
| Variables                    | 7       | Clearly define all outcomes, exposures, predictors, potential confounders, and effect modifiers. Give diagnostic criteria, if applicable                                                                     | 5-6     |
| Data sources/<br>measurement | 8*      | For each variable of interest, give sources of data and details of methods of assessment (measurement). Describe comparability of assessment methods if there is more than one group                         | 5-6     |
| Bias                         | 9       | Describe any efforts to address potential sources of bias                                                                                                                                                    | 6       |
| Study size                   | 10      | Explain how the study size was arrived at                                                                                                                                                                    | 5       |
| Quantitative variables       | 11      | Explain how quantitative variables were handled in the analyses. If applicable, describe which groupings were chosen and why                                                                                 | 5-6     |
| Statistical methods          | 12      | (a) Describe all statistical methods, including those used to control for confounding                                                                                                                        | 6       |
|                              |         | (b) Describe any methods used to examine subgroups and interactions                                                                                                                                          | NA      |
|                              |         | (c) Explain how missing data were addressed                                                                                                                                                                  | NA      |
|                              |         | (d) If applicable, describe analytical methods taking account of sampling strategy                                                                                                                           | NA      |
|                              |         | (e) Describe any sensitivity analyses                                                                                                                                                                        | NA      |
| <b>Results</b>               |         |                                                                                                                                                                                                              |         |
| Participants                 | 13*     | (a) Report numbers of individuals at each stage of study—eg numbers potentially eligible, examined for eligibility, confirmed eligible, included in the study, completing follow-up, and analysed            | 7       |
|                              |         | (b) Give reasons for non-participation at each stage                                                                                                                                                         | 7       |
|                              |         | (c) Consider use of a flow diagram                                                                                                                                                                           | NA      |
| Descriptive data             | 14*     | (a) Give characteristics of study participants (eg demographic, clinical, social) and information on exposures and potential confounders                                                                     | 7       |
|                              |         | (b) Indicate number of participants with missing data for each variable of interest                                                                                                                          | NA      |
| Outcome data                 | 15*     | Report numbers of outcome events or summary measures                                                                                                                                                         | 8       |
| Main results                 | 16      | (a) Give unadjusted estimates and, if applicable, confounder-adjusted estimates and their precision (eg, 95% confidence interval). Make clear which confounders were adjusted for and why they were included | NA      |

|                          |    |                                                                                                                                                                            |      |
|--------------------------|----|----------------------------------------------------------------------------------------------------------------------------------------------------------------------------|------|
|                          |    | (b) Report category boundaries when continuous variables were categorized                                                                                                  | 8    |
|                          |    | (c) If relevant, consider translating estimates of relative risk into absolute risk for a meaningful time period                                                           | NA   |
| Other analyses           | 17 | Report other analyses done—eg analyses of subgroups and interactions, and sensitivity analyses                                                                             | NA   |
| <b>Discussion</b>        |    |                                                                                                                                                                            |      |
| Key results              | 18 | Summarise key results with reference to study objectives                                                                                                                   | 9-11 |
| Limitations              | 19 | Discuss limitations of the study, taking into account sources of potential bias or imprecision. Discuss both direction and magnitude of any potential bias                 | 11   |
| Interpretation           | 20 | Give a cautious overall interpretation of results considering objectives, limitations, multiplicity of analyses, results from similar studies, and other relevant evidence | 11   |
| Generalisability         | 21 | Discuss the generalisability (external validity) of the study results                                                                                                      | 11   |
| <b>Other information</b> |    |                                                                                                                                                                            |      |
| Funding                  | 22 | Give the source of funding and the role of the funders for the present study and, if applicable, for the original study on which the present article is based              | 12   |

\*Give information separately for exposed and unexposed groups.

**Note:** An Explanation and Elaboration article discusses each checklist item and gives methodological background and published examples of transparent reporting. The STROBE checklist is best used in conjunction with this article (freely available on the Web sites of PLoS Medicine at <http://www.plosmedicine.org/>, Annals of Internal Medicine at <http://www.annals.org/>, and Epidemiology at <http://www.epidem.com/>). Information on the STROBE Initiative is available at [www.strobe-statement.org](http://www.strobe-statement.org).

# BMJ Open

## Latent profile analysis of nurses' perceived professional benefits in China: a cross-sectional study

|                                 |                                                                                                                                                                                                                                                                                                                                                                                                               |
|---------------------------------|---------------------------------------------------------------------------------------------------------------------------------------------------------------------------------------------------------------------------------------------------------------------------------------------------------------------------------------------------------------------------------------------------------------|
| Journal:                        | <i>BMJ Open</i>                                                                                                                                                                                                                                                                                                                                                                                               |
| Manuscript ID                   | bmjopen-2023-078051.R4                                                                                                                                                                                                                                                                                                                                                                                        |
| Article Type:                   | Original research                                                                                                                                                                                                                                                                                                                                                                                             |
| Date Submitted by the Author:   | 17-Oct-2023                                                                                                                                                                                                                                                                                                                                                                                                   |
| Complete List of Authors:       | Sun, Changli; Third Affiliated Hospital of Zunyi Medical University<br>Jiang, Hu; Third Affiliated Hospital of Zunyi Medical University<br>Yao, Qingfang; The Third Affiliated Hospital of Zunyi Medical University<br>Wang, Xianwei; The Third Affiliated Hospital of Zunyi Medical University<br>Wen, Xueke; Third Affiliated Hospital of Zunyi Medical University<br>Liu, Hanmei; Zunyi Medical University |
| <b>Primary Subject Heading</b>: | Occupational and environmental medicine                                                                                                                                                                                                                                                                                                                                                                       |
| Secondary Subject Heading:      | Nursing, Occupational and environmental medicine                                                                                                                                                                                                                                                                                                                                                              |
| Keywords:                       | Burnout, Professional, Burnout, China                                                                                                                                                                                                                                                                                                                                                                         |
|                                 |                                                                                                                                                                                                                                                                                                                                                                                                               |

SCHOLARONE™  
Manuscripts



I, the Submitting Author has the right to grant and does grant on behalf of all authors of the Work (as defined in the below author licence), an exclusive licence and/or a non-exclusive licence for contributions from authors who are: i) UK Crown employees; ii) where BMJ has agreed a CC-BY licence shall apply, and/or iii) in accordance with the terms applicable for US Federal Government officers or employees acting as part of their official duties; on a worldwide, perpetual, irrevocable, royalty-free basis to BMJ Publishing Group Ltd ("BMJ") its licensees and where the relevant Journal is co-owned by BMJ to the co-owners of the Journal, to publish the Work in this journal and any other BMJ products and to exploit all rights, as set out in our [licence](#).

The Submitting Author accepts and understands that any supply made under these terms is made by BMJ to the Submitting Author unless you are acting as an employee on behalf of your employer or a postgraduate student of an affiliated institution which is paying any applicable article publishing charge ("APC") for Open Access articles. Where the Submitting Author wishes to make the Work available on an Open Access basis (and intends to pay the relevant APC), the terms of reuse of such Open Access shall be governed by a Creative Commons licence – details of these licences and which [Creative Commons](#) licence will apply to this Work are set out in our licence referred to above.

Other than as permitted in any relevant BMJ Author's Self Archiving Policies, I confirm this Work has not been accepted for publication elsewhere, is not being considered for publication elsewhere and does not duplicate material already published. I confirm all authors consent to publication of this Work and authorise the granting of this licence.

1  
2  
3  
4 **1 Latent profile analysis of nurses' perceived professional benefits in**  
5  
6 **2 China: a cross-sectional study**  
7  
8  
9 **3 Running Head: LPA of nurses' perceived professional benefits**  
10  
11  
12

13  
14 5 Changli Sun<sup>1</sup>, Hu Jiang<sup>1\*</sup>, Qingfang Yao<sup>2</sup>, Xianwei Wang<sup>2</sup>, Xueke Wen<sup>1</sup> and Hanmei  
15  
16 6 Liu<sup>2</sup>,

17  
18 7 <sup>1</sup> The Third Affiliated Hospital of Zunyi Medical University (The First People's Hospital of  
19  
20 8 Zunyi), Zunyi, Guizhou, China

21  
22 9 <sup>2</sup> Zunyi Medical University, Zunyi, Guizhou, China

23  
24 10 \*Correspondence: [jianghuchn@163.com](mailto:jianghuchn@163.com), Nursing Department, The Third Affiliated  
25  
26 11 Hospital of Zunyi Medical University (The First People's Hospital of Zunyi), Zunyi,  
27  
28 12 Guizhou, China

29  
30  
31  
32  
33  
34  
35  
36  
37  
38  
39  
40  
41  
42  
43  
44  
45  
46  
47  
48  
49  
50  
51  
52  
53  
54  
55  
56  
57  
58  
59  
60

13



1  
2  
3  
4 14 **Latent profile analysis of nurses' perceived professional benefits in**  
5  
6  
7 15 **China: a cross-sectional study**

8  
9 16 **ABSTRACT**

10 17 **Objective:** To identify profiles of nurses' perceived professional benefits as well as  
11  
12  
13 18 their predictors.

14  
15 19 **Design:** Cross-sectional study.

16  
17 20 **Setting:** The study was carried out online in China.

18  
19 21 **Methods:** From July 6 and July 27, 2022, a total of 1,309 registered nurses participated  
20  
21 22 in the survey by convenient sampling. We collected the Nurses' Perceived Professional  
22  
23 23 Benefits Questionnaire (NPPBQ) and demographic data. Using latent profile analysis  
24  
25 24 (LPA), subgroups of nurses' perceived professional benefits were identified. Moreover,  
26  
27 25 univariate and multinomial logistic regression analysis were conducted to find the  
28  
29 26 factors that were linked with the profiles.

30  
31 27 **Results:** The survey was validly completed by 1309 nurses, with a 92.9% effective  
32  
33 28 return rate. The findings of the LPA demonstrated three unique profiles: low perceived  
34  
35 29 professional benefits (11.8%), moderate perceived professional benefits (57.1%), and  
36  
37 30 high perceived professional benefits (31.1%). There was a correlation between marital  
38  
39 31 status, the number of night shifts per month, and leadership role.

40  
41 32 **Conclusions:** According to our research, registered nurses have three unique  
42  
43 33 professional benefit profiles. In order to sustain the nursing workforce, despite the fact  
44  
45 34 that nurses get a high level of professional benefits, interventions are necessary to  
46  
47 35 increase nurses' perception of their professional value.

48  
49  
50 37 **Keywords:** nurse, perceived professional benefits, latent profile analysis, cross-  
51  
52 38 sectional study

53  
54  
55 40 **Strengths and limitations of this study:**

- 56  
57 41 ● This is a national survey data regarding perceived professional benefit among  
58  
59  
60

1  
2  
3  
4 42 Chinese nurses.

5 43 ● The LPA approach was utilized in this study to investigate heterogeneous  
6  
7 44 subgroups of nurses' perceived professional benefit.

8  
9 45 ● This study was limited by the web-based cross-sectional design and convenient  
10  
11 46 sampling method.

12  
13 47 ● The cross-sectional design of the study makes it impossible to identify causal  
14  
15 48 relationships between latent profiles and influencing factors.  
16  
17  
18  
19  
20  
21  
22  
23  
24  
25  
26  
27  
28  
29  
30  
31  
32  
33  
34  
35  
36  
37  
38  
39  
40  
41  
42  
43  
44  
45  
46  
47  
48  
49  
50  
51  
52  
53  
54  
55  
56  
57  
58  
59  
60

For peer review only

## 49 INTRODUCTION

50 Despite the fact that nursing is a high-risk, high-stress profession, nurses are able  
51 to achieve benefit findings [1-3]. In recent years, the concept of nurses' perceived  
52 professional benefits arises naturally, and has gradually attracted the attention of  
53 researchers. Nurses' perceived professional benefits (NPPB) refer to nurses'  
54 perceptions of the gains and benefits they receive in their profession during the hiring  
55 process, as well as their belief that working in nursing can promote their overall  
56 growth and development [4, 5]. Essentially, perceived professional benefits can be  
57 classified as an emotional experience and cognitive evaluation, which has two  
58 aspects: actual benefits and spiritual benefits [4]. However, there is a lack of in-depth  
59 research on the group heterogeneity of perceived professional benefits among nurse  
60 populations.

### 61 Background

62 It is estimated that 69% of the global health workforce consists of nurses [6].  
63 Yet, the present physical and mental health of nurses is not encouraging, as they  
64 confront high levels of stress, burnout, turnover, and their own ageing [7-9]. Nursing  
65 is no longer a desirable and appealing profession [10], which makes nurse shortages a  
66 widespread worldwide concern [11]. These issues have a direct bearing on the  
67 sustainability and continued growth of the nursing workforce. In recent years, nursing  
68 in China has experienced remarkable growth, and the most recent statistics indicate  
69 that China has more than 5 million registered nurses [12]. Chinese nurses are  
70 extremely susceptible to burnout, and a high desire to leave is a serious concern [13,  
71 14]. However, there is a dearth of comprehensive study and viable remedies.

72 The mental health of nurses is receiving increasing attention from managers and  
73 researchers in the context of positive psychology. It is beginning to be recognized that  
74 nurses' own positive psychology promotes job satisfaction and professional identity,  
75 lessens burnout, and hence reduces turnover rates [15, 16].

76 The profession of nursing can be beneficial to nurses in a number of ways.  
77 Previous studies [17, 18] reported that nursing preceptorship offers many benefits,

1  
2  
3  
4 78 and nurses may find themselves being more committed to the position as a result. A  
5  
6 79 qualitative study [19] found that nurses who were involved in caring for dying  
7  
8 80 patients got a great lot of experience and benefited considerably; they can create a  
9  
10 81 personal philosophy on death and life, in addition to professional growth. Nurses who  
11  
12 82 served as advanced practice nurse roles perceived numerous benefits, including  
13  
14 83 improved patient care quality and safety, professionalism, personal development,  
15  
16 84 career development, intrinsic satisfaction with the role, and impact on other  
17  
18 85 professional groups [20]. A person's perception of professional benefit is an  
19  
20 86 endogenous motivation for his or her development and has a positive effect on that  
21  
22 87 person's career. According to prior studies, improving the perceived professional  
23  
24 88 benefit of nurses reduces burnout reduction and enables nurses to approach their work  
25  
26 89 with a good attitude and obtain more favorable comments [21, 22].

27  
28 90 Measures created by researchers to evaluate the perceived professional benefits  
29  
30 91 of nurses were still in little supply. The Preceptor's Perspective of Benefits and  
31  
32 92 Rewards (PPBR) measure was designed by Dibert, et al. [23] to evaluate the  
33  
34 93 perceived benefits of clinical preceptor nurses, however, it is not relevant to general  
35  
36 94 clinical nurses. A questionnaire entitled Nurses' Perceived Professional Benefits  
37  
38 95 Questionnaire (NPPBQ) was developed to assess how Chinese nurses perceive the  
39  
40 96 gains and benefits of their employment [5, 24]. This questionnaire has been utilized in  
41  
42 97 a lot of research to date. While we now have a better grasp of nurses' perceptions of  
43  
44 98 professional benefits, but the heterogeneity of the population is still lack, screening  
45  
46 99 strategies for future precision interventions cannot be developed for identifying low-  
47  
48 100 benefit populations.

49  
50 101 To our knowledge, it has not been shown that sufficient evidence exists to  
51  
52 102 answer the questions of whether nurses' perceived professional benefits differ in  
53  
54 103 groups and what factors contribute to these differences. The current study was created  
55  
56 104 to bridge that gap. This study's objective was to examine the characteristics and  
57  
58 105 determinants of nurses' perceived professional benefits as well as the predictors of  
59  
60 106 these latent profiles.

1  
2  
3  
4 1075 108 **MATERIALS AND METHODS**7 109 **Study design**

9 110 An online survey with convenient sampling was used in this study to conduct a cross-  
11 111 sectional analysis. This study was designed and reported in accordance with the  
13 112 guidelines for Strengthening the Reporting of Observational Studies in Epidemiology  
15 113 (STROBE)[25].

17 114

19 115 **Sample size estimation**

21 116 An examination of the latent profiles of perceived professional benefits among  
23 117 nurses was conducted in this study. LPA needs a sample size larger than 500 [26, 27],  
25 118 therefore, the minimum sample size for this study was 500.

27 119

29 120 **Participants**

31 121 Participants in this study required to meet the inclusion criteria and be registered  
33 122 nurses. To be considered, candidates had to satisfy the following criteria to be  
35 123 considered: (1) having worked as a nurse in a medical facility, and (2) being willing to  
37 124 participate in this study. The following were the exclusion criteria: logical errors or  
39 125 missing information in questionnaire answers.

41 126

43 127 **Measurements**45 128 **Demographic**

47 129 This study gathered and evaluated demographic data including age, gender, greatest  
49 130 degree of education, marital status, and other participant characteristics.

51 131

53 132 **Nurses' Perceived Professional Benefits Questionnaire (NPPBQ)**

55 133 The questionnaire was designed by Jing Hu, et al. [5] to investigate the gains and  
57 134 benefits that nurses perceived from their jobs. The authors then reduced it to 17 items  
59 135 by 2020 [24]. The questionnaire has five dimensions: personal growth, a good nurse-

60

1  
2  
3  
4 136 patient relationship, recognition from family and friends, a positive occupational  
5  
6 137 perception, and team belonging. Items are scored on a 5-point Likert scale (1 =  
7  
8 138 strongly disagree, 2 = disagree, 3 = not sure, 4 = agree, 5 = strongly agree).  
9  
10 139 Cronbach's alphas for the questionnaires were 0.94, and the NPPBQ  
11  
12 140 subquestionnaires' alphas were 0.84, 0.83, 0.74, 0.79, and 0.85.  
13  
14 141

#### 15 142 **Data collection**

17 143 During the dates of July 6 and July 27, 2022, data was gathered. Wenjuanxing  
18  
19 144 (www.wjx.cn) was used to develop a web-based questionnaire. Two researchers  
20  
21 145 reviewed the online questionnaire for rigor and verified the feasibility of the  
22  
23 146 questionnaire by completing it within the team. A poster was created to present the  
24  
25 147 link and QR code. It was clearly shown on the poster who would be included and  
26  
27 148 excluded from the survey. We distributed the questionnaire nationwide in China and  
28  
29 149 did not limit the source and setting of nurses. The researcher contacted administrators  
30  
31 150 or general nurses to disseminate the questionnaire. Wechat was used to send the  
32  
33 151 poster and information letter. The survey can be completed by clicking on the link or  
34  
35 152 scanning the QR code, completed questionnaires can be returned directly to the web.  
36

#### 37 153

#### 38 154 **Statistical analyses**

40 155 The use of latent profile analysis (LPA) is frequently used to determine the  
41  
42 156 number of subpopulations in a given sample. LPA is a statistical method that use  
43  
44 157 potential category variables to explain the link between exogenous continuous-type  
45  
46 158 indicators, permitting the assessment of the correlation between exogenous indicators  
47  
48 159 and the maintenance of local independence among exogenous indicators [27]. Latent  
49  
50 160 profile analysis was conducted using Mplus 7.4 software. Log likelihood (LL),  
51  
52 161 Akaike information criterion (AIC), Akaike Information Criterion (BIC), Adjusted  
53  
54 162 Bayesian Information Criteria (aBIC), Entropy, Lo-Mendell-Rubin (LMR), and the  
55  
56 163 Bootstrapped Likelihood Ratio Test (BLRT) were used to assess model fit and  
57  
58 164 determine the appropriate number of categories. In order to decide which model best  
59  
60

1  
2  
3  
4 165 fit the data, the models from each category's fitting results were combined with the  
5  
6 166 aforementioned indicators. The data was examined using the SPSS 26.0 statistical  
7  
8 167 program. We utilized frequency and composition ratios for categorical data, whereas  
9  
10 168 mean and standard deviation were utilized for continuous variables. The chi-square  
11  
12 169 test was performed to compare category variables across groups. ANOVA was used  
13  
14 170 to compare continuous variables among multiple groups. A multivariate logistic  
15  
16 171 regression model was employed to analyze the variations in demographic variables. A  
17  
18 172 statistically significant difference was indicated by  $p < 0.05$ .

19  
20 173

#### 21 174 **Ethical considerations**

22  
23 175 The Ethics Committee of the First People's Hospital of Zunyi (2022-016) approved  
24  
25 176 the study, and participants gave permission for data collection. Prior to completing the  
26  
27 177 survey, participants will be provided with information about the purpose of the study  
28  
29 178 and the major substance of the research. They will then be able to provide their  
30  
31 179 informed consent through a yes or no response. In addition, participants were also  
32  
33 180 informed that the study's findings would be given in aggregate form and that no  
34  
35 181 participant could be identified. If a person declined to complete the questionnaire, the  
36  
37 182 collection was immediately ended.

38  
39 183

#### 40 184 **Patient and public involvement**

41  
42 185 Patients and/or the public were not involved in the design, or conduct, or reporting, or  
43  
44 186 dissemination plans of this research.

45  
46 187

## 47 188 **RESULTS**

### 48 189 **Participant characteristics**

49  
50 190 A total of 1409 nurses completed the questionnaire, while 58 nurses denied  
51  
52 191 participation, for a total number of 1351 questionnaires received. 42 surveys were  
53  
54 192 considered invalid due to insufficient or inaccurate information. 92.9 percent of the  
55  
56 193 final 1309 surveys were correctly returned. The ages of the participants varied from 18

194 to 59 years old, with a mean age of 32.25 (SD: 6.18) years old. The bulk of participants  
195 were female (86.7%), whereas the minority were male (3.2%).

196

### 197 **Characteristics of the different classes**

198 On the basis of the NPPBQ's five dimensions, it was established that a model with three  
199 latent classes provided the greatest match. A class represents different categorisation  
200 methods, such as a class 1 for a single subgroup, a class 2 for two heterogeneous  
201 subgroups, and so forth. Table 1 provides the results. While the AIC and BIC in class  
202 4 were lower in class 4 than in class 3, the entropy was greater; nonetheless, the lowest  
203 category probability in class 4 was 1.4%, which is unsatisfactory. As a consequence,  
204 we decided that the best-fitting model is class 3. Using a three-class model, Figure 1  
205 illustrates the mean scores for each category within the NPPBQ's dimensions. The  
206 percentages increase from class 1 to class 3 as follows: 11.8% (155 nurses), 57.1% (747  
207 nurses), and 31.1% (407 nurses). For the sake of brevity, based on the profile scores,  
208 we named class 1 as the low perceived professional benefits, class 2 as the moderate  
209 perceived professional benefits, and class 3 as the high perceived professional benefits.

210 **Table 1** Potential profile analysis indicators ( $N=1309$ )

| Model   | LL <sup>a</sup> | AIC <sup>b</sup> | BIC <sup>c</sup> | aBIC <sup>d</sup> | Entropy | LMR <sup>e</sup><br><i>p</i> -value | BLRT <sup>f</sup><br><i>p</i> -value | Category probability    |
|---------|-----------------|------------------|------------------|-------------------|---------|-------------------------------------|--------------------------------------|-------------------------|
| Class 1 | -<br>14709.353  | 29438.706        | 29490.476        | 29458.711         | -       | -                                   | -                                    | -                       |
| Class 2 | -<br>13420.425  | 26872.850        | 26955.682        | 26904.857         | 0.905   | <<br>0.001                          | < 0.001                              | 0.654/0.346             |
| Class 3 | -<br>12583.629  | 25211.257        | 25325.152        | 25255.268         | 0.936   | 0.007                               | < 0.001                              | 0.118/0.571/0.311       |
| Class 4 | -<br>12307.807  | 24671.613        | 24816.570        | 24727.627         | 0.940   | 0.036                               | < 0.001                              | 0.151/0.014/0.530/0.306 |

211

212 a Log likelihood, b Akaike information criterion, c Bayesian information criterion, d Adjusted  
213 bayesian information criterion, e Lo-Mendell-Rubin Likelihood Ratio Test, f Bootstrapped  
214 Likelihood Ratio Test

215



216 **The scale and dimension scores of different profiles**

217 The findings of a one-way ANOVA indicated statistically significant differences in the  
 218 scale and dimension scores of different profiles (both  $p < 0.001$ ). The results were shown  
 219 in Figure 2 demonstrates the outcomes.

221 **Demographic and related characteristics of each profile**

222 The ANOVA and chi-square tests indicated statistically significant differences  
 223 between the three profiles differed statistically in terms of age, marital status, children,  
 224 professional title, leadership role, working years, and number of night shifts per month.  
 225 Table 2 is a summary of the results.

226 **Table 2** Demographic and characteristics by latent profile ( $N=1309$ )

| Variables                | Class 1      | Class 2         | Class 3      | $\chi^2/F$ | $p$     |
|--------------------------|--------------|-----------------|--------------|------------|---------|
| Age (SD)                 | 30.94 (5.37) | 31.76<br>(5.91) | 33.64 (6.71) | 16.545     | < 0.001 |
| Gender                   |              |                 |              | 0.600      | 0.741   |
| Male                     | 6 (3.9)      | 25 (3.3)        | 11 (2.7)     |            |         |
| Female                   | 149 (96.1)   | 722 (96.7)      | 396 (97.3)   |            |         |
| Highest Degree           |              |                 |              | 1.602      | 0.449   |
| Junior college and below | 29 (18.7)    | 111 (14.9)      | 60 (14.7)    |            |         |
| Bachelor's and above     | 126 (81.3)   | 636 (85.1)      | 347 (85.3)   |            |         |
| Marital status           |              |                 |              | 25.768     | < 0.001 |
| Single/divorced/widowed  | 62 (40.0)    | 218 (29.2)      | 80 (19.7)    |            |         |
| Married                  | 93 (60.0)    | 529 (70.8)      | 327 (80.3)   |            |         |
| Children                 |              |                 |              | 26.943     | < 0.001 |
| Yes                      | 87 (56.1)    | 481 (64.4)      | 311 (76.4)   |            |         |
| No                       | 68 (43.9)    | 266 (35.6)      | 96 (23.6)    |            |         |
| Professional title       |              |                 |              | 23.589     | < 0.001 |

|                                  |            |            |            |        |         |
|----------------------------------|------------|------------|------------|--------|---------|
| Junior Level                     | 102 (65.8) | 448 (60.0) | 207 (50.9) |        |         |
| Intermediate level               | 50 (32.3)  | 280 (37.5) | 172 (42.3) |        |         |
| Senior level                     | 3 (1.9)    | 19 (2.5)   | 28 (6.9)   |        |         |
| Leadership role                  |            |            |            | 17.086 | < 0.001 |
| Yes                              | 18 (11.6)  | 86 (11.5)  | 82 (20.1)  |        |         |
| No                               | 137 (88.4) | 661 (88.5) | 325 (79.9) |        |         |
| Working years (years)            |            |            |            | 32.903 | < 0.001 |
| ≤5                               | 52 (33.5)  | 217 (29.0) | 79 (19.4)  |        |         |
| 6–15                             | 91 (58.7)  | 438 (58.6) | 241 (59.2) |        |         |
| ≥16                              | 12 (7.7)   | 92 (12.3)  | 87 (21.4)  |        |         |
| Average monthly income (yuan)*   |            |            |            | 7.990  | 0.239   |
| ≤3000                            | 23 (14.8)  | 75 (10.0)  | 43 (10.6)  |        |         |
| 3001~6000                        | 93 (60.0)  | 415 (55.6) | 217 (53.3) |        |         |
| 6001~9000                        | 27 (17.4)  | 179 (24.0) | 105 (25.8) |        |         |
| ≥9001                            | 12 (7.7)   | 78 (10.4)  | 42 (10.3)  |        |         |
| Number of night shifts per month |            |            |            | 17.797 | 0.001   |
| 0                                | 42 (27.1)  | 233 (31.2) | 164 (40.3) |        |         |
| 1–4                              | 22 (14.2)  | 143 (19.1) | 73 (17.9)  |        |         |
| ≥5                               | 91 (58.7)  | 371 (49.7) | 170 (41.8) |        |         |

227

228 \* 1 USD equals 7.31 Chinese Yuan, exchange rate on September 29, 2023

229

230 A multivariate logistic regression model was constructed using the variables with  
 231 statistically significant differences as determined by ANOVA and chi-square tests. Of  
 232 the three profiles, the class 3 was chosen as a reference to find the predictors linked  
 233 with NPPBQ. As shown in Table 3, nurses who were single/divorced/widowed were

234 more likely to belonged to low perceived professional benefits (*OR*: 1.984,  
 235 95%*CI*:1.028-3.828). The number of night shifts worked per month was associated with  
 236 low perceived professional benefits (*OR*: 0.633, 95% *CI*: 0.405-0.988), compared to  
 237 those with more than five night shifts, those without night shifts tended to fall into the  
 238 high perceived professional benefits. Nurses without a leadership role were more likely  
 239 to be in the moderate perceived professional benefits (*OR*: 1.489, 95% *CI*: 1.028-2.157).  
 240 Other variables were not statistically significant in the multivariate logistic regression.

241

242

243

244

245

**Table 3** Predictors of latent profile membership

| Variables               | Class 1 VS Class 3 |           |               | Class 2 VS Class 3 |           |               |
|-------------------------|--------------------|-----------|---------------|--------------------|-----------|---------------|
|                         | $\beta$            | <i>OR</i> | 95% <i>CI</i> | $\beta$            | <i>OR</i> | 95% <i>CI</i> |
| Age (SD)                | 0.004              | 1.004     | 0.941-1.070   | -0.005             | 0.995     | 0.957-1.034   |
| Marital status          |                    |           |               |                    |           |               |
| Single/divorced/widowed | 0.685              | 1.984*    | 1.028-3.828   | 0.115              | 1.122     | 0.716-1.760   |
| Married (Ref)           |                    |           |               |                    |           |               |
| Children                |                    |           |               |                    |           |               |
| No                      | 0.177              | 1.194     | 0.622-2.293   | 0.240              | 1.272     | 0.822-1.967   |
| Yes (Ref)               |                    |           |               |                    |           |               |
| Professional title      |                    |           |               |                    |           |               |
| Junior level            | 0.368              | 1.444     | 0.334-6.241   | 0.359              | 1.433     | 0.661-3.105   |
| Intermediate level      | 0.378              | 1.460     | 0.370-5.766   | 0.429              | 1.535     | 0.764-3.085   |
| Senior level (Ref)      |                    |           |               |                    |           |               |
| Leadership role         |                    |           |               |                    |           |               |
| No                      | 0.139              | 1.984     | 1.028-3.828   | 0.398              | 1.489*    | 1.028-2.157   |
| Yes (Ref)               |                    |           |               |                    |           |               |
| Working years (years)   |                    |           |               |                    |           |               |

|    |                            |        |        |             |        |       |             |
|----|----------------------------|--------|--------|-------------|--------|-------|-------------|
| 1  |                            |        |        |             |        |       |             |
| 2  |                            |        |        |             |        |       |             |
| 3  |                            |        |        |             |        |       |             |
| 4  | ≤5                         | 0.781  | 2.184  | 0.666-7.161 | 0.411  | 1.508 | 0.748-3.042 |
| 5  |                            |        |        |             |        |       |             |
| 6  | 6–15                       | 0.721  | 2.057  | 0.847-5.000 | 0.228  | 1.256 | 0.773-2.039 |
| 7  |                            |        |        |             |        |       |             |
| 8  | ≥16 (Ref)                  |        |        |             |        |       |             |
| 9  | Number of night shifts per |        |        |             |        |       |             |
| 10 | month                      |        |        |             |        |       |             |
| 11 |                            |        |        |             |        |       |             |
| 12 | 0                          | -0.458 | 0.633* | 0.405-0.988 | -0.223 | 0.800 | 0.601-1.064 |
| 13 |                            |        |        |             |        |       |             |
| 14 | 1–4                        | -0.354 | 0.702  | 0.400-1.231 | 0.089  | 1.094 | 0.768-1.558 |
| 15 |                            |        |        |             |        |       |             |
| 16 | ≥5 (Ref)                   |        |        |             |        |       |             |
| 17 |                            |        |        |             |        |       |             |

246 \* $p < 0.05$ ; *OR*, Odds ratio; 95% *CI*, 95% Confidence Interval; Ref, Reference.

## 247 **DISCUSSION**

248 The purpose of this research was to identify distinct profiles of nurses' perceived  
249 professional benefits. Furthermore, the current study employed multinomial logistic  
250 regression to investigate predictors of these profiles.

251 In this study, we investigated 1309 nurses who validly completed the questionnaire.  
252 As a result, three latent profiles were identified: low perceived professional benefits,  
253 moderate perceived professional benefits, and high perceived professional benefits. Our  
254 research revealed that the majority of nurses had a moderate or higher levels of  
255 perceived professional benefits, with just 11.8% of nurses belonging to the category of  
256 nurses with low perceived professional benefits. Most studies reported nurses had an  
257 upper-moderate level of perceived professional benefits [28, 29], and our findings are  
258 consistent with those of previous studies. Most importantly, our study clarified the  
259 heterogeneous subgroups of nurses' perceived professional benefits and their specific  
260 distribution.

261 In the last three years, nurses have been a key part of the fight against the COVID-  
262 19 outbreak. Despite heavy job pressure, nurses have had a feeling of professional  
263 calling and value [30], which has effectively enhanced their sense of professional  
264 benefit [1]. At the same time, the critical role of nurses in defending people's lives and  
265 health has earned the society's respect and recognition, as well as a positive social image  
266 [31, 32], which can further enhance nurses' sense of professional benefit. Our survey  
267 was conducted during the COVID-19 epidemic, and nurses' perceptions of professional  
268 benefit may be elevated.

269 Another finding of our study revealed that the membership of profiles can be  
270 predicted by some characteristics such as the number of night shifts, leadership role,  
271 and marriage status. Nursing is a continuous, 24-hour profession, and nurse's work  
272 normally takes the form of night shifts. It is widely proven that night shifts negatively  
273 impact the physical and emotional health of nurses [33-36]. Nurses working rotating  
274 night shifts were normally younger, and they had the lower scores of job satisfaction,  
275 quality of sleep, and quantity of sleep [37], these factors resulted in a low perceived

1  
2  
3  
4 276 professional benefits. Consistent with past research, our findings indicate that the  
5  
6 277 greater the frequency of night shifts, the lower the perceived professional benefit [29].

7  
8 278 According to our results, 57.1% of nurses perceived professional benefits as  
9  
10 279 moderate. The majority of nurses in the moderate perceived professional benefits  
11  
12 280 group lacked a work title, while the majority of nurses in the highly perceived  
13  
14 281 professional benefits group held a leadership role. This has been validated by other  
15  
16 282 research, and our work provides more support for this notion [29]. Holding a  
17  
18 283 managerial position at a hospital is a means of advancing one's career, and nurses  
19  
20 284 highly value this opportunity.

21 285 Our study found that nurses who were single/divorced/widowed were more likely  
22  
23 286 to belong to low perceived professional benefits, which is consistent with earlier  
24  
25 287 findings [29]. This may be because, unlike single/divorced/widowed nurses, married  
26  
27 288 nurses receive more social support from their spouses and other family members.

28  
29 289 We hypothesized that job fulfillment and social support are important influencing  
30  
31 290 mechanisms that affect nurses' perceived professional benefits. The number of night  
32  
33 291 shifts, leadership roles are important indicators of nurses' job fulfillment. Marital status  
34  
35 292 is an important factor in social support. Each of these factors can have varying degrees  
36  
37 293 of impact on the actual benefit or spiritual benefit [4]. Considering that nurses perceive  
38  
39 294 professional benefits as a result of personal, organizational, environmental, and social  
40  
41 295 factors, a well-developed theoretical framework is required to explain this phenomenon.

42 296 Unfortunately, our research failed to demonstrate that the profiles can be predicted  
43  
44 297 by other factors in the model variables. Our findings in the univariate analysis results  
45  
46 298 were consistent with earlier research. Nevertheless, because the bulk of prior research  
47  
48 299 did not employ multi-factor models, it was impossible to compare our findings could  
49  
50 300 not be compared to those of others. In addition, certain putative contributing elements  
51  
52 301 were not adequately proven, and further research is required to confirm them in the  
53  
54 302 future.

55  
56 303 Our research has theoretical and practical implications for the future study of  
57  
58 304 nurses' perceived professional benefits. First, the number of night shifts, leadership

1  
2  
3  
4 305 role, and marriage status are the most significant factors affecting nurses' perceived  
5  
6 306 professional benefits, and in the future, we should focus on the degree of influence of  
7  
8 307 these three factors and explore the mechanisms from the theoretical level. Second,  
9  
10 308 managers should pay active attention to the perceived professional benefits of clinical  
11  
12 309 nurses, create a favorable working environment and professional growth atmosphere,  
13  
14 310 and promote the professional success of nurses. Given that 11.8% of nurses still have  
15  
16 311 a low perceived sense of career benefit, more tailored intervention programs are still  
17  
18 312 needed in the future.

19 313

### 20 314 **Strengths and limitations**

21  
22  
23 315 To the best of our knowledge, this is the first study to use the LPA approach to explore  
24  
25 316 heterogeneous subgroups of nurses' perceived professional benefit with a large sample  
26  
27 317 size, and we presented a unique perspective and a basis for future research on the  
28  
29 318 perceived career benefits of nurses. The research was limited in some ways. First, this  
30  
31 319 was a web-based survey, and the sample process and self-reporting strategy may have  
32  
33 320 resulted in some bias. Second, we only polled nurses in mainland China, and our sample  
34  
35 321 only reflected the current situation in a single nation. Lastly, the constraints of the  
36  
37 322 study's design prohibited an in-depth assessment of the psychological factors behind  
38  
39 323 nurses' perceptions of their professional benefit. As a result, more rigorously designed  
40  
41 324 studies will be required in the future to investigate this issue in depth.

42 325

### 43 326 **CONCLUSION**

44  
45  
46 327 Our study identified three professional benefits profiles among nurses. The results of  
47  
48 328 our study indicated that nurses enjoy a high level of professional benefits.

49  
50 329 Notwithstanding the study's limitations of the study and the present condition of  
51  
52 330 nursing, it is vital that we engage on several levels to encourage a stable nursing  
53  
54 331 workforce, including policy, organisation, financial income, and career development,  
55  
56 332 so that nurses experience a sense of professional gain.

57  
58 333

1  
2  
3  
4 334 **Acknowledgements**

5 335 None.

6  
7 336 **AUTHOR CONTRIBUTIONS**

8  
9 337 Jiang Hu and Sun Changli were responsible for the conception and study design. Yao

10  
11 338 Qiangfang, Wang Xianwei and Liu Hanmei performed the data collection. Yao

12  
13 339 Qiangfang, Wang Xianwei and Wen Xueke contributed to the analysis of the data.

14  
15 340 Sun Changli and Jiang Hu were involved in drafting the manuscript and revising it.

16  
17 341 All authors have read and approved the final manuscript.

18  
19 342 **FUNDING**

20  
21 343 This study was funded by the Science and Technology Joint Funds of Zunyi Science

22  
23 344 and Technology Bureau (2023-73).

24  
25 345 **CONFLICT OF INTEREST**

26  
27 346 The authors have no conflicts of interest to declare.

28  
29 347 **Ethics approval**

30  
31 348 This study involves human participants and was approved by the Ethics Committee of

32  
33 349 the First People's Hospital of Zunyi (2022-016). Participants gave informed consent to

34  
35 350 participate in the study before taking part.

36  
37 351 **Data availability statement**

38  
39 352 Data are available upon reasonable request. Data are available from the corresponding

40  
41 353 author and the first author on reasonable request.

42  
43 354



355 **REFERENCES**

- 356 1. Wang X, Chen F, Dai P, Lin X, Qi L: **Perceived professional benefits and associated**  
357 **factors among nurses during the COVID-19 pandemic: A cross-sectional study.** *Nurs*  
358 *Open* 2023, **10**(3):1461-1470.
- 359 2. Jiang H, Huang N, Tian W, Shi S, Yang G, Pu H: **Factors Associated With Post-**  
360 **traumatic Stress Disorder Among Nurses During COVID-19.** *Front Psychol* 2022,  
361 **13**:745158.
- 362 3. Liu S, Duan X, Han P, Shao H, Jiang J, Zeng L: **Occupational benefit perception of**  
363 **acute and critical care nurses: A qualitative meta-synthesis.** *Front Public Health* 2022,  
364 **10**:976146.
- 365 4. Zhou H, Zhu Y, Zhang X, Peng J, Li Q, Wang X, Wang L, Cai X, Lan L: **Psychological**  
366 **Capital and Perceived Professional Benefits: Testing the Mediating Role of Perceived**  
367 **Nursing Work Environment Among Chinese Nurses.** *J Psychosoc Nurs Ment Health*  
368 *Serv* 2018, **56**(4):38-47.
- 369 5. Hu J, Liu X: **The preparation of nurses' occupational benefit questionnaire and its**  
370 **reliability and validity test [J].** *J Chin People's Liberation Army* 2013, **30**(22):1-5.
- 371 6. Malone B: **A Perspective on the State of the World's Nursing Report.** *Nurs Adm Q* 2021,  
372 **45**(1):6-12.
- 373 7. Ivziku D, de Maria M, Ferramosca FMP, Greco A, Tartaglini D, Gualandi R: **What**  
374 **determines physical, mental and emotional workloads on nurses? A cross-sectional**  
375 **study.** *J Nurs Manag* 2022, **30**(8):4387-4397.
- 376 8. Morgan B, Jordan L, Rivera LA: **Considerations for an aging nurse anesthetists**

- 1  
2  
3  
4 377 workforce. *Geriatr Nurs* 2020, **41**(6):1017-1019.
- 5  
6 378 9. Tamata AT, Mohammadnezhad M: **A systematic review study on the factors affecting**  
7  
8  
9 379 **shortage of nursing workforce in the hospitals.** *Nurs Open* 2023, **10**(3):1247-1257.
- 10  
11 380 10. van der Cingel M, Brouwer J: **What makes a nurse today? A debate on the nursing**  
12  
13 381 **professional identity and its need for change.** *Nurs Philos* 2021, **22**(2):e12343.
- 14  
15  
16  
17 382 11. Udod S: **A Call for Urgent Action: Innovations for Nurse Retention in Addressing the**  
18  
19 383 **Nursing Shortage.** *Nurs Rep* 2023, **13**(1):145-147.
- 20  
21  
22 384 12. **China Statistical Yearbook** [<http://www.stats.gov.cn/sj/ndsj/2022/indexch.htm>]
- 23  
24  
25 385 13. Zeng LN, Zhang JW, Zong QQ, Chan SW, Browne G, Ungvari GS, Chen LG, Xiang  
26  
27 386 **YT: Prevalence of burnout in mental health nurses in China: A meta-analysis of**  
28  
29 387 **observational studies.** *Arch Psychiatr Nurs* 2020, **34**(3):141-148.
- 30  
31  
32 388 14. Chen JP, Dai YM, Qin Y, Liang SP, Cheng G, Liu Y, Yang CZ, He HG, Shen Q: **Factors**  
33  
34 389 **influencing turnover intention among male nurses in China: A large-scale descriptive**  
35  
36 390 **correlational study.** *Int Nurs Rev* 2023.
- 37  
38  
39  
40 391 15. Yu JF, Ding YM, Jia RY, Liang DD, Wu Z, Lu GL, Chen CR: **Professional identity and**  
41  
42 392 **emotional labour affect the relationship between perceived organisational justice and**  
43  
44 393 **job performance among Chinese hospital nurses.** *J Nurs Manag* 2022, **30**(5):1252-  
45  
46 394 1262.
- 47  
48  
49  
50 395 16. Lin L, Liu X, He G: **Mindfulness and Job Satisfaction Among Hospital Nurses: The**  
51  
52 396 **Mediating Roles of Positive Affect and Resilience.** *J Psychosoc Nurs Ment Health Serv*  
53  
54 397 2020, **58**(6):46-55.
- 55  
56  
57  
58 398 17. Macey A, Green C, Jarden RJ: **ICU nurse preceptors' perceptions of benefits, rewards,**  
59  
60

- 1  
2  
3  
4 399 **supports and commitment to the preceptor role: A mixed-methods study.** *Nurse Educ*  
5  
6 400 *Pract* 2021, **51**:102995.  
7  
8  
9 401 18. Natan MB, Qeadan H, Egbaria W: **The commitment of Israeli nursing preceptors to the**  
10  
11 402 **role of preceptor.** *Nurse Educ Today* 2014, **34**(12):1425-1429.  
12  
13  
14 403 19. Zheng RS, Guo QH, Dong FQ, Owens RG: **Chinese oncology nurses' experience on**  
15  
16 404 **caring for dying patients who are on their final days: a qualitative study.** *Int J Nurs Stud*  
17  
18 405 2015, **52**(1):288-296.  
19  
20  
21 406 20. Christiansen A, Vernon V, Jinks A: **Perceptions of the benefits and challenges of the**  
22  
23 407 **role of advanced practice nurses in nurse-led out-of-hours care in Hong Kong: a**  
24  
25 408 **questionnaire study.** *J Clin Nurs* 2013, **22**(7-8):1173-1181.  
26  
27  
28 409 21. Wu B, Zhao Y, Xu D, Wang Y, Niu N, Zhang M, Zhi X, Zhu P, Meng A: **Factors**  
29  
30 410 **associated with nurses' willingness to participate in care of patients with COVID-19: A**  
31  
32 411 **survey in China.** *J Nurs Manag* 2020, **28**(7):1704-1712.  
33  
34  
35 412 22. Liu X, Ju X, Liu X: **The relationship between resilience and intent to stay among**  
36  
37 413 **Chinese nurses to support Wuhan in managing COVID-19: The serial mediation effect**  
38  
39 414 **of post-traumatic growth and perceived professional benefits.** *Nurs Open* 2021,  
40  
41 415 **8**(5):2866-2876.  
42  
43  
44 416 23. Dibert C, Goldenberg D: **Preceptors' perceptions of benefits, rewards, supports and**  
45  
46 417 **commitment to the preceptor role.** *J Adv Nurs* 1995, **21**(6):1144-1151.  
47  
48  
49 418 24. Hu Y, Hu J, Li L, Zhao B, Liu X, Li F: **Development and preliminary validation of a brief**  
50  
51 419 **nurses' perceived professional benefit questionnaire (NPPBQ).** *BMC Med Res*  
52  
53 420 *Methodol* 2020, **20**(1):18.  
54  
55  
56  
57  
58  
59  
60

- 1  
2  
3  
4 421 25. von Elm E, Altman DG, Egger M, Pocock SJ, Gøtzsche PC, Vandenbroucke JP: **The**  
5  
6 422 **Strengthening the Reporting of Observational Studies in Epidemiology (STROBE)**  
7  
8  
9 423 **Statement: guidelines for reporting observational studies.** *Int J Surg* 2014, **12**(12):1495-  
10  
11 424 1499.
- 12  
13  
14 425 26. Nylund KL, Asparouhov T, Muthén BO: **Deciding on the number of classes in latent**  
15  
16 426 **class analysis and growth mixture modeling: A Monte Carlo simulation study.** *Structural*  
17  
18 427 *equation modeling: A multidisciplinary Journal* 2007, **14**(4):535-569.
- 19  
20  
21  
22 428 27. Spurk D, Hirschi A, Wang M, Valero D, Kauffeld S: **Latent profile analysis: A review**  
23  
24 429 **and "how to" guide of its application within vocational behavior research.** *Journal of*  
25  
26 430 *vocational behavior* 2020, **120**:103445.
- 27  
28  
29  
30 431 28. Ma HW, Dan X, Xu SH, Hou RN, Zhao NM: **[Current status of nurses' perceived**  
31  
32 432 **professional benefits and influencing factors in 3A-level hospitals in Tianjin].** *Zhonghua*  
33  
34 433 *Lao Dong Wei Sheng Zhi Ye Bing Za Zhi* 2017, **35**(6):443-447.
- 35  
36  
37  
38 434 29. Zhan T, Li H, Ding X: **Can social support enhance sense of coherence and perceived**  
39  
40 435 **professional benefits among Chinese registered nurses? A mediation model.** *J Nurs*  
41  
42 436 *Manag* 2020, **28**(3):488-494.
- 43  
44  
45  
46 437 30. Savitsky B, Radomislensky I, Hendel T: **Nurses' occupational satisfaction during Covid-**  
47  
48 438 **19 pandemic.** *Appl Nurs Res* 2021, **59**:151416.
- 49  
50  
51 439 31. Mohammed S, Peter E, Killackey T, Maciver J: **The "nurse as hero" discourse in the**  
52  
53 440 **COVID-19 pandemic: A poststructural discourse analysis.** *Int J Nurs Stud* 2021,  
54  
55 441 **117**:103887.
- 56  
57  
58 442 32. Begnini D, Cicolella DA, Freitas KR, Maranhão T, Rocha CMF, Kruse MHL: **Heroines**  
59  
60

- 1  
2  
3  
4 443 in Covid-19 times: visibility of nursing in the pandemic. *Rev Gaucha Enferm* 2021,  
5  
6 444 42(spe):e20200373.  
7  
8  
9 445 33. James L, Elkins-Brown N, Wilson M, James SM, Dotson E, Edwards CD, Wintersteen-  
10  
11 446 Arleth L, Stevens K, Butterfield P: **The effects of three consecutive 12-hour shifts on**  
12  
13 447 **cognition, sleepiness, and domains of nursing performance in day and night shift**  
14  
15 448 **nurses: A quasi-experimental study.** *Int J Nurs Stud* 2021, 123:104041.  
16  
17  
18  
19 449 34. Weaver SH, de Cordova PB, Vitale TR, Hargwood P, Salmond S: **Experiences and**  
20  
21 450 **perceptions of nurses working night shift: a qualitative systematic review.** *JBI Evid*  
22  
23 451 *Synth* 2023, 21(1):33-97.  
24  
25  
26  
27 452 35. Borroni E, Frigerio G, Polledri E, Mercadante R, Maggioni C, Fedrizzi L, Pesatori AC,  
28  
29 453 Fustinoni S, Carugno M: **Metabolomic profiles in night shift workers: A cross-sectional**  
30  
31 454 **study on hospital female nurses.** *Front Public Health* 2023, 11:1082074.  
32  
33  
34  
35 455 36. Jørgensen JT, Rozing MP, Westendorp RGJ, Hansen J, Stayner LT, Simonsen MK,  
36  
37 456 Andersen ZJ: **Shift work and incidence of psychiatric disorders: The Danish Nurse**  
38  
39 457 **Cohort study.** *J Psychiatr Res* 2021, 139:132-138.  
40  
41  
42  
43 458 37. Ferri P, Guadi M, Marcheselli L, Balduzzi S, Magnani D, Di Lorenzo R: **The impact of**  
44  
45 459 **shift work on the psychological and physical health of nurses in a general hospital: a**  
46  
47 460 **comparison between rotating night shifts and day shifts.** *Risk Manag Healthc Policy*  
48  
49 461 2016, 9:203-211.  
50  
51  
52  
53 462  
54 463  
55  
56  
57  
58  
59  
60

1  
2  
3  
4 464 **Figure 1** Latent profiles of NPPBQ

5  
6 465

7  
8 466 **Figure 2** The scale and dimension scores of different profiles

9  
10 467

11  
12 468  
13  
14  
15  
16  
17  
18  
19  
20  
21  
22  
23  
24  
25  
26  
27  
28  
29  
30  
31  
32  
33  
34  
35  
36  
37  
38  
39  
40  
41  
42  
43  
44  
45  
46  
47  
48  
49  
50  
51  
52  
53  
54  
55  
56  
57  
58  
59  
60

For peer review only

1  
2  
3  
4  
5  
6  
7  
8  
9  
10  
11  
12  
13  
14  
15  
16  
17  
18  
19  
20  
21  
22  
23  
24  
25  
26  
27  
28  
29  
30  
31  
32  
33  
34  
35  
36  
37  
38  
39  
40  
41  
42  
43  
44  
45  
46  
47  
48  
49  
50  
51  
52  
53  
54  
55  
56  
57  
58  
59  
60



Latent profiles of NPPBQ  
145x76mm (300 x 300 DPI)

1  
2  
3  
4  
5  
6  
7  
8  
9  
10  
11  
12  
13  
14  
15  
16  
17  
18  
19  
20  
21  
22  
23  
24  
25  
26  
27  
28  
29  
30  
31  
32  
33  
34  
35  
36  
37  
38  
39  
40  
41  
42  
43  
44  
45  
46  
47  
48  
49  
50  
51  
52  
53  
54  
55  
56  
57  
58  
59  
60



The scale and dimension scores of different profiles

145x114mm (300 x 300 DPI)



STROBE Statement—Checklist of items that should be included in reports of *cross-sectional studies*

|                              | Item No | Recommendation                                                                                                                                                                                               | Page No |
|------------------------------|---------|--------------------------------------------------------------------------------------------------------------------------------------------------------------------------------------------------------------|---------|
| <b>Title and abstract</b>    | 1       | (a) Indicate the study's design with a commonly used term in the title or the abstract                                                                                                                       | 2       |
|                              |         | (b) Provide in the abstract an informative and balanced summary of what was done and what was found                                                                                                          | 2       |
| <b>Introduction</b>          |         |                                                                                                                                                                                                              |         |
| Background/rationale         | 2       | Explain the scientific background and rationale for the investigation being reported                                                                                                                         | 3-4     |
| Objectives                   | 3       | State specific objectives, including any prespecified hypotheses                                                                                                                                             | 4-5     |
| <b>Methods</b>               |         |                                                                                                                                                                                                              |         |
| Study design                 | 4       | Present key elements of study design early in the paper                                                                                                                                                      | 5       |
| Setting                      | 5       | Describe the setting, locations, and relevant dates, including periods of recruitment, exposure, follow-up, and data collection                                                                              | 5       |
| Participants                 | 6       | (a) Give the eligibility criteria, and the sources and methods of selection of participants                                                                                                                  | 5       |
| Variables                    | 7       | Clearly define all outcomes, exposures, predictors, potential confounders, and effect modifiers. Give diagnostic criteria, if applicable                                                                     | 5-6     |
| Data sources/<br>measurement | 8*      | For each variable of interest, give sources of data and details of methods of assessment (measurement). Describe comparability of assessment methods if there is more than one group                         | 5-6     |
| Bias                         | 9       | Describe any efforts to address potential sources of bias                                                                                                                                                    | 6       |
| Study size                   | 10      | Explain how the study size was arrived at                                                                                                                                                                    | 5       |
| Quantitative variables       | 11      | Explain how quantitative variables were handled in the analyses. If applicable, describe which groupings were chosen and why                                                                                 | 5-6     |
| Statistical methods          | 12      | (a) Describe all statistical methods, including those used to control for confounding                                                                                                                        | 6       |
|                              |         | (b) Describe any methods used to examine subgroups and interactions                                                                                                                                          | NA      |
|                              |         | (c) Explain how missing data were addressed                                                                                                                                                                  | NA      |
|                              |         | (d) If applicable, describe analytical methods taking account of sampling strategy                                                                                                                           | NA      |
|                              |         | (e) Describe any sensitivity analyses                                                                                                                                                                        | NA      |
| <b>Results</b>               |         |                                                                                                                                                                                                              |         |
| Participants                 | 13*     | (a) Report numbers of individuals at each stage of study—eg numbers potentially eligible, examined for eligibility, confirmed eligible, included in the study, completing follow-up, and analysed            | 7       |
|                              |         | (b) Give reasons for non-participation at each stage                                                                                                                                                         | 7       |
|                              |         | (c) Consider use of a flow diagram                                                                                                                                                                           | NA      |
| Descriptive data             | 14*     | (a) Give characteristics of study participants (eg demographic, clinical, social) and information on exposures and potential confounders                                                                     | 7       |
|                              |         | (b) Indicate number of participants with missing data for each variable of interest                                                                                                                          | NA      |
| Outcome data                 | 15*     | Report numbers of outcome events or summary measures                                                                                                                                                         | 8       |
| Main results                 | 16      | (a) Give unadjusted estimates and, if applicable, confounder-adjusted estimates and their precision (eg, 95% confidence interval). Make clear which confounders were adjusted for and why they were included | NA      |

|                          |    |                                                                                                                                                                            |      |
|--------------------------|----|----------------------------------------------------------------------------------------------------------------------------------------------------------------------------|------|
|                          |    | (b) Report category boundaries when continuous variables were categorized                                                                                                  | 8    |
|                          |    | (c) If relevant, consider translating estimates of relative risk into absolute risk for a meaningful time period                                                           | NA   |
| Other analyses           | 17 | Report other analyses done—eg analyses of subgroups and interactions, and sensitivity analyses                                                                             | NA   |
| <b>Discussion</b>        |    |                                                                                                                                                                            |      |
| Key results              | 18 | Summarise key results with reference to study objectives                                                                                                                   | 9-11 |
| Limitations              | 19 | Discuss limitations of the study, taking into account sources of potential bias or imprecision. Discuss both direction and magnitude of any potential bias                 | 11   |
| Interpretation           | 20 | Give a cautious overall interpretation of results considering objectives, limitations, multiplicity of analyses, results from similar studies, and other relevant evidence | 11   |
| Generalisability         | 21 | Discuss the generalisability (external validity) of the study results                                                                                                      | 11   |
| <b>Other information</b> |    |                                                                                                                                                                            |      |
| Funding                  | 22 | Give the source of funding and the role of the funders for the present study and, if applicable, for the original study on which the present article is based              | 12   |

\*Give information separately for exposed and unexposed groups.

**Note:** An Explanation and Elaboration article discusses each checklist item and gives methodological background and published examples of transparent reporting. The STROBE checklist is best used in conjunction with this article (freely available on the Web sites of PLoS Medicine at <http://www.plosmedicine.org/>, Annals of Internal Medicine at <http://www.annals.org/>, and Epidemiology at <http://www.epidem.com/>). Information on the STROBE Initiative is available at [www.strobe-statement.org](http://www.strobe-statement.org).
